# Supplementary material for: Copper-catalyzed asymmetric alkynylation of pyrazole-4,5-diones using chloramphenicol base-derived hydroxyl oxazoline ligands
Source: Royal Society of Chemistry journal article supplement (doi:10.1039/d2qo00213b), 2022-01-01
Supplement: d2qo00213b1.pdf [file d2qo00213b1.pdf]

## SUPPORTING INFORMATION

---

### Supporting Information

# Copper-catalyzed asymmetric alkynylation of pyrazole-4,5-diones with chloramphenicol base-derived hydroxyl oxazoline ligands

Zhao-Feng Li <sup>[a]</sup>, Hong-Jiao He <sup>[a]</sup>, Rong-Hui Wang <sup>[a]</sup>, Li-Yan Zhou <sup>[a]</sup>, You-Cai Xiao <sup>\*[a]</sup>, Fen-Er Chen <sup>\*[a, b, c]</sup>

<sup>a</sup> Key Laboratory of Drug-Targeting and Drug Delivery System of the Ministry of Education and Sichuan Research Center for Drug Precision Industrial Technology, West China School of Pharmacy, Sichuan University, Chengdu 610041, China

<sup>b</sup> Engineering Center of Catalysis and Synthesis for Chiral Molecules, Department of Chemistry, Fudan University, Shanghai 200433, China

<sup>c</sup> Shanghai Engineering Center of Industrial Asymmetric Catalysis for Chiral Drugs, Shanghai 200433, China, Shanghai, 200433, China

E-mail: xiaoliguo1987@scu.edu.cn; rfchen@fudan.edu.cn

## SUPPORTING INFORMATION

---

### Table of Contents

|                                 |    |
|---------------------------------|----|
| 1. General Information.....     | 3  |
| 2. Experimental Procedures..... | 3  |
| 3. Reference .....              | 11 |
| 4. Spectral Data .....          | 12 |
| 5. HPLC Spectra.....            | 51 |

## 1. General Information

All commercially available reagents were used without further purification. Chromatography was conducted by using 300–400 mesh silica gel.  $^1\text{H}$  and  $^{13}\text{C}$  spectra of known compounds were in accordance with those described in the literatures.  $^1\text{H}$  (400 MHz or 600 MHz),  $^{13}\text{C}$  (100 MHz or 150 MHz) NMR and  $^{19}\text{F}$  (376 MHz) were recorded on a Bruker Avance 400 spectrometer in  $\text{CDCl}_3$  or DMSO using tetramethylsilane (TMS) as internal standards. Coupling constants ( $J$ ) are given in Hz and are uncorrected and multiplicities for coupled signals were denoted as: s = singlet, d = doublet, t = triplet, q = quartet, m = multiplet, br. = broad, apt. = apparent and dd = double doublet etc. High-resolution mass spectra (HRMS) were recorded on a Bruker TOF Premier, by the ESI method. Melting points (m.p.) were recorded on an SRS-optic melting point apparatus. Optical rotation was obtained from Rudolph Research Analytical Autopol VI automatic polarimeter. Chiral HPLC was performed using Daicel Chiralcel analytical column. Unless otherwise noted, all products are isolated yields.

## 2. Experimental Procedures

### 2.1 Preparation of chloramphenicol base (ANP)-derived ligands (L1–L7)

ANP-derived amino alcohol ligand **L1** was prepared by the reported literature.<sup>1</sup> The product matched the known  $^1\text{H}$  NMR spectra. Typical procedure for the preparation of ANP-derived hydroxyl oxazolines ligands **L2–L7**.<sup>2</sup>

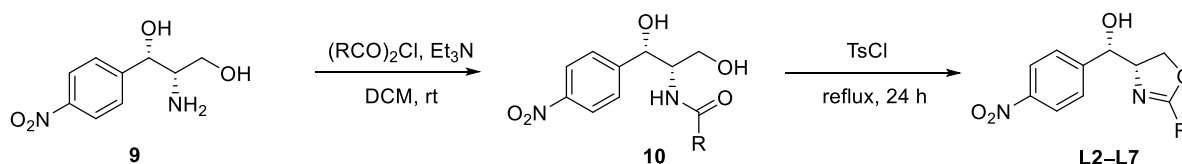

To a solution of (1*S*,2*S*)-2-amino-1-(*p*-nitrophenyl) propane 1, 3-diol **9** (4.24 g, 20 mmol) in 40 mL  $\text{CH}_2\text{Cl}_2$  was added triethylamine (10.1 g, 0.1 mol). Then the mixture was cooled to  $0^\circ\text{C}$ , alkyl or aryl anhydride (20 mmol) was added dropwise. The reaction was allowed to warm to room temperature until the consumption of starting material was observed by TLC. The reaction was quenched by water (200 mL), and organic materials were extracted with dichloromethane (30 mL x 3). The combined extracts were washed with brine, and dried over anhydrous  $\text{Na}_2\text{SO}_4$ . The solvent was removed under reduced pressure and the residue was purified by flash chromatography on silica gel ( $\text{DCM}/\text{CH}_3\text{OH}=100:1$ ) to afford **10**.

TsCl was added to a solution of **10** in  $\text{CH}_2\text{Cl}_2$ , the resulting mixture was brought to reflux for 24 h. The reaction was quenched by water (150 mL), and organic materials were extracted with dichloromethane (30 mL x 3). The combined extracts were washed with brine, and dried over anhydrous  $\text{Na}_2\text{SO}_4$ . The solvent was removed under reduced pressure and the residue was purified by flash chromatography on silica gel followed by recrystallization from EtOAc/Hexane to afford **L2–L7**. The compounds (**L2–L5**) matched the known  $^1\text{H}$  NMR spectra.

### (*S*)-((*S*)-2-benzhydryl-4,5-dihydrooxazol-4-yl) (4-nitrophenyl) methanol (**L6**)

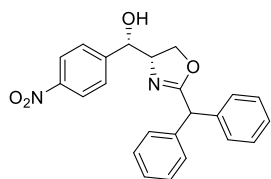

Prepared by the general procedure from anhydride diphenylacetic acid, and **L6** was isolated as a white solid,  $^1\text{H}$  NMR (400 MHz,  $\text{DMSO}-d_6$ )  $\delta$  8.14 – 8.09 (m, 2H), 7.59 – 7.57 (m, 2H), 7.28 – 7.14 (m, 10H), 5.93 (d,  $J = 4.4$  Hz, 1H), 5.02 (s, 1H), 4.95 – 4.93 (m, 1H), 4.51 (td,  $J = 8.4, 3.9$  Hz, 1H), 4.25 – 4.23 (m, 2H).  $^{13}\text{C}$  NMR (100 MHz,  $\text{DMSO}-d_6$ )  $\delta$  167.7, 150.4, 147.0, 140.4, 140.2, 129.0, 128.9, 128.7, 128.6, 128.5, 127.2, 127.1, 123.0, 72.2, 71.2, 68.7, 50.4. HRMS (ESI)  $m/z$  calcd for  $\text{C}_{23}\text{H}_{21}\text{N}_2\text{O}_4$  [ $\text{M} + \text{H}$ ] $^+$ : 389.1496,

found: 389.1492.

## SUPPORTING INFORMATION

### (S)-((S)-2-cyclohexyl-4,5-dihydrooxazol-4-yl) (4-nitrophenyl) methanol (L7)

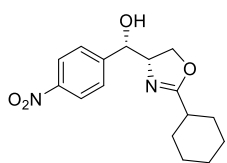

Prepared by the general procedure from cyclohexanecarbonyl, and **L7** was isolated as a white solid,  $^1\text{H NMR}$  (400 MHz,  $\text{DMSO-}d_6$ )  $\delta$  8.18 – 8.15 (m, 2H), 7.61 – 7.59 (m, 2H), 5.75 (d,  $J = 4.8$  Hz, 1H), 4.86 – 4.83 (m, 1H), 4.42 – 4.36 (m, 1H), 4.13 – 4.05 (m, 2H), 2.11 – 2.05 (m, 1H), 1.70 – 1.47 (m, 5H), 1.26 – 1.10 (m, 5H).  $^{13}\text{C NMR}$  (100 MHz,  $\text{DMSO-}d_6$ )  $\delta$  170.8, 150.5, 146.9, 128.6, 122.9, 72.4, 71.1, 68.0, 36.8, 29.8, 29.7, 25.9, 25.3. **HRMS (ESI)**  $m/z$  calcd for  $\text{C}_{16}\text{H}_{21}\text{N}_2\text{O}_4$  [ $\text{M} + \text{H}$ ] $^+$ : 305.1496, found: 305.1491.

### 2.2 General synthesis of pyrazole-4,5-dione (5a-m)<sup>3</sup>

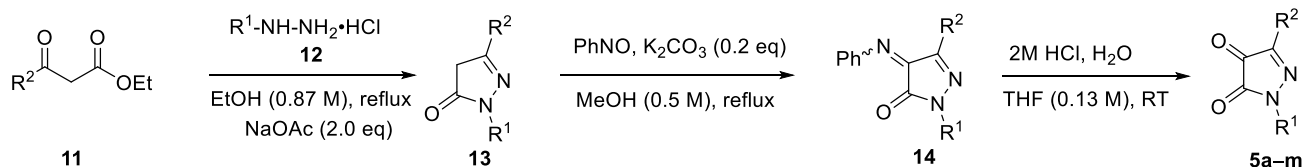

To a solution of **11** (20 mmol, 1.0 equiv.) in ethanol (30 mL, 0.87 M) was added **12** (40 mmol, 2.0 equiv.) and sodium acetate (3.29 g, 40 mmol, 2.0 equiv.). A reflux condenser was then fitted to the reaction flask, and the reaction mixture was refluxed overnight with stirring and under an atmosphere of nitrogen. After cooling to room temperature, the mixture was diluted with water, transferred to a separatory funnel, and extracted with  $\text{CH}_2\text{Cl}_2$ . The combined organic layers were washed with brine, dried over  $\text{Na}_2\text{SO}_4$ , then vacuo and the residue were chromatographed giving compound pyrazolon derivative **13**.

Add PhNO (1.0 equiv.) to a solution of pyrazolon derivative **13** (1.0 equiv.) in MeOH (0.6 M) and the  $\text{K}_2\text{CO}_3$  (0.2 equiv.) was added at once, the mixture was refluxed for 3 hours. The solvent was removed under reduced pressure and the crude product was directly purified by flash column chromatography (silica, *n*-pentane / diethyl ether) to afford the desired product **14**.

To a solution of pyrazolon-derived phenyl-ketimine **14** in THF (0.13 M), 2 M HCl was added and stirring at room temperature in 10 minutes–5.5 hours. The reaction mixture was neutralized with a saturated solution of  $\text{H}_2\text{O}$  and extracted with  $\text{CH}_2\text{Cl}_2$ . The organic layer was dried over  $\text{Na}_2\text{SO}_4$ , evaporated in vacuo and the compound **5** was purified by flash chromatography. The products matched the known  $^1\text{H NMR}$  spectra.

### 2.3 General procedure for the asymmetric alkylation of pyrazole-4,5-dione

To a mixture of CuI (3.8 mg, 0.02 mmol), **L5** (6.1 mg, 0.022 mmol), 4Å MS (50 mg), 2-methyltetrahydrofuran (0.25 mL) was added under an atmosphere of nitrogen and the mixture was stirred at room temperature for 2 hours. Then phenylacetylene (**6a-t**) (14  $\mu\text{L}$ , 0.12 mmol) was added to the mixture. After stirred for 30 minutes at the same temperature, pyrazole-4,5-dione (**5a-m**) (18.8 mg, 0.1 mmol) and 2-methyltetrahydrofuran (0.25 mL) were added in one portion. The mixture was stirred at  $-10$  °C until the starting material was completely consumed (TLC monitoring). After completion, the crude product was concentrated under reduced pressure to dryness, purification by column chromatography on silica gel (PE/EA=10:1) afforded the alkylation products (**7a-t** and **8a-m**).

### (S)-4-hydroxy-5-methyl-2-phenyl-4-(phenylethynyl)-2,4-dihydro-3H-pyrazol-3-one (7a)

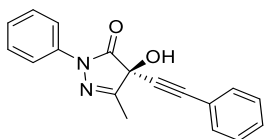

White solid, 27.6 mg, 95% yield. mp = 130.2–132.7 °C.  $[\alpha]_{\text{D}}^{25} = -380.4$  ( $c = 0.27$  in  $\text{CH}_2\text{Cl}_2$ ). 98% ee. **HPLC** (CHIRALCEL AD-H), *n*-hexane/2-propanol = 90/10, flow rate 0.8 mL/min, detection at 254 nm,  $t_{\text{R}} = 12.0$  min (minor), 15.0 min (major). {Lit.<sup>4</sup>  $[\alpha]_{\text{D}}^{25} = -380.4$  ( $c = 0.27$ ,  $\text{CH}_2\text{Cl}_2$ ) for (S)-enantiomer}.  $^1\text{H NMR}$  (400 MHz, Chloroform-*d*)  $\delta$  7.82 – 7.80 (m, 2H), 7.37 – 7.31 (m, 4H), 7.29 – 7.24 (m, 1H), 7.21 – 7.17 (m, 2H), 7.16 – 7.11 (m, 1H), 4.20 (s, 1H), 2.26 (s, 3H).  $^{13}\text{C NMR}$  (100 MHz, Chloroform-*d*)  $\delta$  168.8, 158.0, 136.4, 131.1, 128.4, 127.9, 127.3, 124.6, 119.8, 118.0, 87.8, 80.7, 72.1, 12.0. **HRMS (ESI)**  $m/z$  calcd for  $\text{C}_{18}\text{H}_{13}\text{N}_2\text{NaO}_2$  [ $\text{M} + \text{Na}$ ] $^+$ : 312.0875, found: 312.0874.

## SUPPORTING INFORMATION

### (S)-4-hydroxy-4-((4-methoxyphenyl) ethynyl)-5-methyl-2-phenyl-2,4-dihydro-3H-pyrazol-3-one (7b)

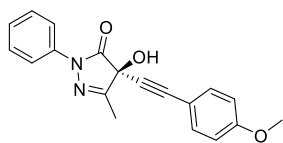

White solid, 28.8 mg, 90% yield. mp = 204.3–206.8 °C.  $[\alpha]_D^{25} = -325.6$  ( $c = 0.12$  in  $\text{CH}_2\text{Cl}_2$ ). 93% ee.

**HPLC** (CHIRALCEL AD-H), *n*-hexane/2-propanol = 90/10, flow rate 0.8 mL/min, detection at 254 nm,  $t_R = 21.9$  min (minor), 19.0 min (major).  **$^1\text{H NMR}$**  (400 MHz, Chloroform-*d*)  $\delta$  7.90 – 7.87 (m, 2H), 7.43 – 7.26 (m, 4H), 7.23 – 7.20 (m, 1H), 6.83 – 6.75 (m, 2H), 4.36 (s, 1H), 3.80 (s, 3H), 2.34 (s, 3H).  **$^{13}\text{C NMR}$**

(100 MHz, Chloroform-*d*)  $\delta$  168.7, 159.5, 157.7, 136.5, 132.8, 127.9, 124.5, 117.9, 113.0, 111.7, 88.1, 79.5, 72.0, 54.3, 12.0.

**HRMS (ESI)**  $m/z$  calcd for  $\text{C}_{19}\text{H}_{16}\text{N}_2\text{NaO}_3$  [ $\text{M} + \text{Na}$ ] $^+$ : 343.1053, found: 343.1057.

### (S)-4-hydroxy-5-methyl-2-phenyl-4-(*p*-tolylethynyl)-2,4-dihydro-3H-pyrazol-3-one (7c)

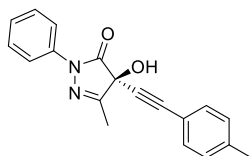

White solid, 28.3 mg, 93% yield. mp = 138.2–140.5 °C.  $[\alpha]_D^{25} = -278.5$  ( $c = 0.27$  in  $\text{CH}_2\text{Cl}_2$ ). 90% ee. **HPLC**

(CHIRALCEL AD-H), *n*-hexane/2-propanol = 90/10, flow rate 0.8 mL/min, detection at 254 nm,  $t_R = 14.9$  min (minor), 13.5 min (major).  **$^1\text{H NMR}$**  (400 MHz, Chloroform-*d*)  $\delta$  7.90 – 7.88 (m, 2H), 7.43 – 7.39 (m, 2H), 7.33 (d,  $J = 7.8$  Hz, 2H), 7.23 – 7.19 (m, 1H), 7.08 (d,  $J = 7.8$  Hz, 2H), 4.29 (s, 1H), 2.34 (s, 6H).  **$^{13}\text{C NMR}$**

(100 MHz, Chloroform-*d*)  $\delta$  168.5, 157.5, 138.9, 136.5, 131.1, 128.1, 127.9, 124.5, 117.9, 116.6, 88.2, 80.0, 71.9, 20.6, 12.0. **HRMS (ESI)**  $m/z$  calcd for  $\text{C}_{19}\text{H}_{16}\text{N}_2\text{NaO}_2$  [ $\text{M} + \text{Na}$ ] $^+$ : 327.1104, found: 327.1102.

### (S)-4-((4-(*tert*-butyl)phenyl) ethynyl)-4-hydroxy-5-methyl-2-phenyl-2,4-dihydro-3H-pyrazol-3-one (7d)

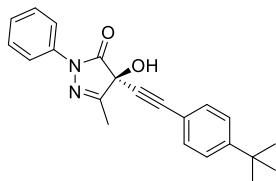

White solid, 31.1 mg, 90% yield. mp = 124.6–126.4 °C.  $[\alpha]_D^{25} = -288.9$  ( $c = 0.24$  in  $\text{CH}_2\text{Cl}_2$ ). 93% ee.

**HPLC** (CHIRALCEL AD-H), *n*-hexane/2-propanol = 90/10, flow rate 0.8 mL/min, detection at 254 nm,  $t_R = 15.6$  min (minor), 10.7 min (major).  **$^1\text{H NMR}$**  (400 MHz, Chloroform-*d*)  $\delta$  7.90 – 7.88 (m, 2H), 7.43 – 7.37 (m, 4H), 7.30 – 7.28 (m, 2H), 7.23 – 7.19 (m, 1H), 4.56 (s, 1H), 2.34 (s, 3H), 1.29 (s, 9H).  **$^{13}\text{C NMR}$**

(100 MHz, Chloroform-*d*)  $\delta$  168.7, 157.8, 151.9, 136.4, 130.9, 127.9, 124.5, 124.3, 117.9, 116.7, 88.2, 80.1, 72.0, 33.8, 30.1, 12.0. **HRMS (ESI)**  $m/z$  calcd for  $\text{C}_{22}\text{H}_{22}\text{N}_2\text{NaO}_2$  [ $\text{M} + \text{Na}$ ] $^+$ : 369.1573, found: 369.1572.

### (S)-4-((4-fluorophenyl)ethynyl)-4-hydroxy-5-methyl-2-phenyl-2,4-dihydro-3H-pyrazol-3-one (7e)

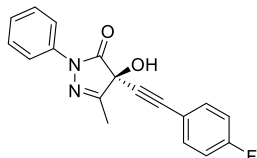

White solid, 28.3 mg, 92% yield. mp = 140.2–142.3 °C.  $[\alpha]_D^{25} = -282.9$  ( $c = 0.23$  in  $\text{CH}_2\text{Cl}_2$ ). 97% ee. **HPLC**

(CHIRALCEL AD-H), *n*-hexane/2-propanol = 90/10, flow rate 0.8 mL/min, detection at 254 nm,  $t_R = 13.8$  min (minor), 16.2 min (major).  **$^1\text{H NMR}$**  (400 MHz, Chloroform-*d*)  $\delta$  7.82 – 7.79 (m, 2H), 7.39 – 7.31 (m, 3H), 7.18 – 7.12 (m, 2H), 6.94 – 6.89 (m, 2H), 4.25 – 4.23 (m, 1H), 2.26 (s, 3H).  **$^{13}\text{C NMR}$**  (100 MHz, Chloroform-*d*)  $\delta$  168.5, 162.2 (d,  $J = 251.7$  Hz), 157.4, 136.4, 133.3 (d,  $J = 8.7$  Hz), 127.9, 124.6, 117.9,

115.9 (d,  $J = 3.6$  Hz), 114.8 (d,  $J = 22.3$  Hz), 86.8, 80.5, 71.9, 12.0.  **$^{19}\text{F NMR}$**  (376 MHz, Chloroform-*d*)  $\delta$  -108.4. **HRMS (ESI)**  $m/z$  calcd for  $\text{C}_{18}\text{H}_{13}\text{N}_2\text{NaO}_2\text{F}$  [ $\text{M} + \text{Na}$ ] $^+$ : 331.0853, found: 331.0854.

### (S)-4-((4-chlorophenyl) ethynyl)-4-hydroxy-5-methyl-2-phenyl-2,4-dihydro-3H-pyrazol-3-one (7f)

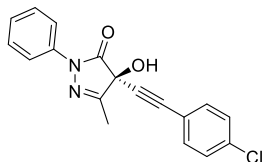

White solid, 28.2 mg, 87% yield. mp = 154.2–156.3 °C.  $[\alpha]_D^{25} = -295.2$  ( $c = 0.18$  in  $\text{CH}_2\text{Cl}_2$ ). 92% ee. **HPLC**

(CHIRALCEL AD-H), *n*-hexane/2-propanol = 90/10, flow rate 0.8 mL/min, detection at 254 nm,  $t_R = 16.3$  min (minor), 17.7 min (major).  **$^1\text{H NMR}$**  (400 MHz, Chloroform-*d*)  $\delta$  7.89 – 7.86 (m, 2H), 7.44 – 7.36 (m, 3H), 7.30 – 7.27 (m, 3H), 7.24 – 7.20 (m, 1H), 4.09 (s, 1H), 2.33 (s, 3H).  **$^{13}\text{C NMR}$**  (100 MHz, Chloroform-*d*)  $\delta$  168.3, 157.2, 136.4, 134.9, 132.4, 127.9, 127.8, 124.6, 118.2, 117.9, 86.7, 81.6, 71.8, 12.1. **HRMS**

(ESI)  $m/z$  calcd for  $\text{C}_{18}\text{H}_{13}\text{N}_2\text{NaO}_2\text{Cl}$  [ $\text{M} + \text{Na}$ ] $^+$ : 347.0558, found: 347.0551.

### (S)-4-((4-bromophenyl) ethynyl)-4-hydroxy-5-methyl-2-phenyl-2,4-dihydro-3H-pyrazol-3-one (7g)

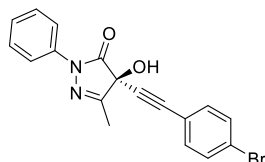

White solid, 31.3 mg, 86% yield. mp = 151.2–153.7 °C.  $[\alpha]_D^{25} = -229.0$  ( $c = 0.24$  in  $\text{CH}_2\text{Cl}_2$ ). 95% ee.

**HPLC** (CHIRALCEL AD-H), *n*-hexane/2-propanol = 90/10, flow rate 0.8 mL/min, detection at 254 nm,  $t_R = 8.4$  min (minor), 10.1 min (major).  **$^1\text{H NMR}$**  (400 MHz, Chloroform-*d*)  $\delta$  7.89 – 7.86 (m, 2H), 7.46 – 7.39 (m, 4H), 7.33 – 7.29 (m, 2H), 7.24 – 7.20 (m, 1H), 3.88 (s, 1H), 2.33 (s, 3H).  **$^{13}\text{C NMR}$**  (100 MHz, Chloroform-*d*)  $\delta$  168.2, 157.1, 136.4, 132.5, 130.7, 127.9, 124.6, 123.2, 118.6, 117.9, 86.7, 81.8, 71.8,

## SUPPORTING INFORMATION

12.1. **HRMS (ESI)**  $m/z$  calcd for  $C_{19}H_{16}N_2NaO_2$  [ $M + Na$ ] $^+$ : 389.9975, found: 389.9980.

### (S)-4-hydroxy-5-methyl-2-phenyl-4-((4-(trifluoromethyl)phenyl)ethynyl)-2,4-dihydro-3H-pyrazol-3-one (7h)

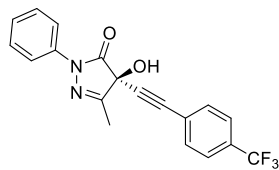

White solid, 32.2 mg, 90% yield. mp = 153.2–155.3 °C.  $[\alpha]_D^{25} = -252.4$  ( $c = 0.30$  in  $CH_2Cl_2$ ). 89% ee.

**HPLC** (CHIRALCEL AD-H), *n*-hexane/2-propanol = 90/10, flow rate 0.8 mL/min, detection at 254 nm,  $t_R = 15.5$  min (minor), 17.1 min (major).  **$^1H$  NMR** (400 MHz, Chloroform-*d*)  $\delta$  7.90 – 7.87 (m, 2H), 7.54 – 7.53(m, 4H), 7.43 – 7.39 (m, 2H), 7.24 (d,  $J = 7.4$  Hz, 1H), 4.75 (s, 1H), 2.35 (s, 3H).  **$^{13}C$  NMR** (100 MHz, Chloroform-*d*)  $\delta$  168.5, 157.4, 136.3, 131.4, 130.2 (d,  $J = 32.9$  Hz), 128.0, 124.8, 124.3 (q,  $J = 3.8$  Hz),

123.5, 122.6 (d,  $J = 272.5$  Hz), 117.9, 86.3, 82.9, 71.9, 12.1.  **$^{19}F$  NMR** (376 MHz, Chloroform-*d*)  $\delta$  -63.1. **HRMS (ESI)**  $m/z$  calcd for  $C_{19}H_{13}N_2NaO_2F_3$ [ $M + Na$ ] $^+$ : 381.0821, found: 381.0810.

### (S)-4-((4-aminophenyl) ethynyl)-4-hydroxy-5-methyl-2-phenyl-2,4-dihydro-3H-pyrazol-3-one (7i)

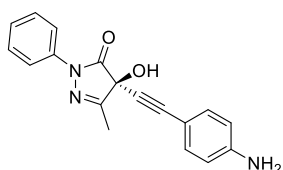

Brown oil, 25.6 mg, 84% yield.  $[\alpha]_D^{25} = -87.7$  ( $c = 0.16$  in  $CH_2Cl_2$ ). 88% ee. **HPLC** (CHIRALCEL OD-H), *n*-hexane/2-propanol = 70/30, flow rate 0.8 mL/min, detection at 254 nm,  $t_R = 31.8$  min (minor), 14.5 min (major).  **$^1H$  NMR** (400 MHz, DMSO-*d*<sub>6</sub>)  $\delta$  7.81 – 7.78 (m, 2H), 7.49 – 7.46 (m, 1H), 7.45 – 7.42 (m, 1H), 7.25 – 7.20 (m, 1H), 7.16 – 7.11 (m, 2H), 6.53 – 6.49 (m, 2H), 5.67 (s, 2H), 2.21 (s, 3H).  **$^{13}C$  NMR** (150 MHz, DMSO-*d*<sub>6</sub>)  $\delta$  169.4, 159.9, 150.2, 137.3, 133.1, 129.0, 125.0, 118.1, 113.4, 105.7, 89.1, 79.8, 72.3,

12.5. **HRMS (ESI)**  $m/z$  calcd for  $C_{18}H_{15}N_3NaO_2$  [ $M + Na$ ] $^+$ : 328.1056, found: 328.1059.

### (S)-4-hydroxy-4-((3-methoxyphenyl) ethynyl)-5-methyl-2-phenyl-2,4-dihydro-3H-pyrazol-3-one (7j)

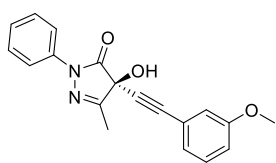

White solid, 27.2 mg, 85% yield. mp = 107.7–109.3 °C.  $[\alpha]_D^{25} = -294.1$  ( $c = 0.3$  in  $CH_2Cl_2$ ). 91% ee. **HPLC** (CHIRALCEL AD-H), *n*-hexane/2-propanol = 90/10, flow rate 0.8 mL/min, detection at 254 nm,  $t_R = 15.4$  min (minor), 20.3 min (major).  **$^1H$  NMR** (400 MHz, Chloroform-*d*)  $\delta$  7.90 – 7.88 (m, 2H), 7.43 – 7.39 (m, 2H), 7.24 – 7.17 (m, 2H), 7.05 – 7.03 (m, 1H), 6.97 – 6.96 (m, 1H), 6.92 – 6.89 (m, 1H), 4.07 (s, 1H), 3.77 (s, 3H), 2.34 (s, 3H).  **$^{13}C$  NMR** (100 MHz, Chloroform-*d*)  $\delta$  168.4, 158.2, 157.4, 136.4, 128.4, 127.9, 124.6,

123.7, 120.7, 117.9, 115.7, 115.4, 87.8, 80.4, 71.9, 54.3, 12.0. **HRMS (ESI)**  $m/z$  calcd for  $C_{19}H_{16}N_2NaO_3$  [ $M + Na$ ] $^+$ : 343.1053, found: 343.1049.

### (S)-4-hydroxy-5-methyl-2-phenyl-4-(*m*-tolylethynyl)-2,4-dihydro-3H-pyrazol-3-one (7k)

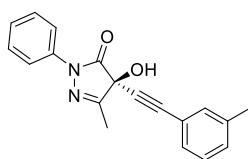

White solid, 28.6 mg, 94% yield. mp = 138.2–140.5 °C.  $[\alpha]_D^{25} = -297.2$  ( $c = 0.20$  in  $CH_2Cl_2$ ). 96% ee. **HPLC** (CHIRALCEL AD-H), *n*-hexane/2-propanol = 90/10, flow rate 0.8 mL/min, detection at 254 nm,  $t_R = 9.9$  min (minor), 12.9 min (major).  **$^1H$  NMR** (400 MHz, Chloroform-*d*)  $\delta$  7.81 – 7.79 (m, 2H), 7.34 – 7.30 (m, 2H), 7.17 – 7.10 (m, 3H), 7.07 – 7.05 (m, 2H), 4.54 (s, 1H), 2.25 – 2.19 (m, 6H).  **$^{13}C$  NMR** (100 MHz, Chloroform-*d*)  $\delta$  168.7, 157.7, 137.1, 136.5, 131.7, 129.4, 128.3, 127.9, 127.2, 124.5, 119.6, 118.0, 88.1, 80.4, 72.0,

20.1, 12.0. **HRMS (ESI)**  $m/z$  calcd for  $C_{19}H_{16}N_2NaO_2$  [ $M + Na$ ] $^+$ : 327.1104, found: 327.1095.

### (S)-4-((3-chlorophenyl) ethynyl)-4-hydroxy-5-methyl-2-phenyl-2,4-dihydro-3H-pyrazol-3-one (7l)

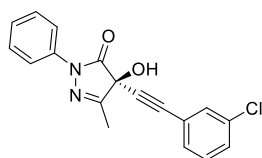

White solid, 29.2 mg, 90% yield. mp = 154.2–157.3 °C.  $[\alpha]_D^{25} = -254.2$  ( $c = 0.16$  in  $CH_2Cl_2$ ). 95% ee. **HPLC** (CHIRALCEL AD-H), *n*-hexane/2-propanol = 90/10, flow rate 0.8 mL/min, detection at 254 nm,  $t_R = 9.4$  min (minor), 13.1 min (major).  **$^1H$  NMR** (400 MHz, DMSO-*d*<sub>6</sub>)  $\delta$  7.82 – 7.77 (m, 3H), 7.63 – 7.62(m, 1H), 7.55 – 7.42(m, 4H), 7.26 – 7.22 (m, 1H), 2.25 (s, 3H).  **$^{13}C$  NMR** (100 MHz, DMSO-*d*<sub>6</sub>)  $\delta$  169.4, 160.0, 137.8, 133.9, 131.8, 131.2, 131.1, 130.5, 129.6, 125.8, 122.8, 118.7, 85.9, 84.6, 72.7, 13.2. **HRMS (ESI)**

$m/z$  calcd for  $C_{18}H_{13}N_2NaO_2Cl$  [ $M + Na$ ] $^+$ : 347.0558, found: 347.0568.

### 4-hydroxy-4-((3-hydroxyphenyl) ethynyl)-5-methyl-2-phenyl-2,4-dihydro-3H-pyrazol-3-one (7m)

## SUPPORTING INFORMATION

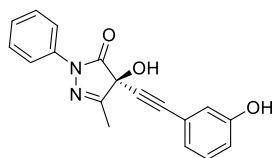

Brown oil, 24.1 mg, 79% yield.  $[\alpha]_{\text{D}}^{25} = -60.3$  ( $c = 0.16$  in  $\text{CH}_2\text{Cl}_2$ ). 81% ee. **HPLC** (CHIRALCEL AD-H),  $n$ -hexane/2-propanol = 90/10, flow rate 0.8 mL/min, detection at 254 nm,  $t_{\text{R}} = 15.9$  min (minor), 17.6 min (major).  **$^1\text{H NMR}$**  (400 MHz,  $\text{DMSO-}d_6$ )  $\delta$  9.77 (s, 1H), 7.82 – 7.78 (m, 2H), 7.72 – 7.69 (m, 1H), 7.48 – 7.44 (m, 2H), 7.25 – 7.18 (m, 2H), 6.95 – 6.92 (m, 1H), 6.86 – 6.84 (m, 2H), 2.23 (s, 3H).  **$^{13}\text{C NMR}$**  (150 MHz,  $\text{DMSO-}d_6$ )  $\delta$  169.1, 159.6, 157.3, 137.2, 129.9, 129.0, 125.2, 122.5, 121.0, 118.2, 118.1, 117.2, 87.1, 82.1, 72.2, 12.5. **HRMS (ESI)**  $m/z$  calcd for  $\text{C}_{18}\text{H}_{14}\text{N}_2\text{NaO}_3$   $[\text{M} + \text{Na}]^+$ : 329.0897, found: 329.0897.

### (S)-4-((2-fluorophenyl)ethynyl)-4-hydroxy-5-methyl-2-phenyl-2,4-dihydro-3H-pyrazol-3-one (7n)

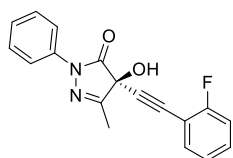

White solid, 28.6 mg, 93% yield. mp = 140.2–143.3 °C.  $[\alpha]_{\text{D}}^{25} = -302.1$  ( $c = 0.16$  in  $\text{CH}_2\text{Cl}_2$ ). 90% ee. **HPLC** (CHIRALCEL AD-H),  $n$ -hexane/2-propanol = 90/10, flow rate 0.8 mL/min, detection at 254 nm,  $t_{\text{R}} = 12.3$  min (minor), 17.0 min (major).  **$^1\text{H NMR}$**  (400 MHz,  $\text{DMSO-}d_6$ )  $\delta$  7.81 – 7.79 (m, 2H), 7.61 – 7.59 (m, 1H), 7.54 – 7.45 (m, 3H), 7.36 – 7.33 (m, 1H), 7.27 – 7.23 (m, 2H), 2.25 (s, 3H).  **$^{13}\text{C NMR}$**  (100 MHz,  $\text{DMSO-}d_6$ )  $\delta$  169.4, 162.8 (d,  $J = 250.8$  Hz), 159.9, 137.8, 134.4, 132.7 (d,  $J = 8.2$  Hz), 129.6, 125.8, 125.4 (d,  $J = 3.6$  Hz), 118.8, 116.3 (d,  $J = 20.3$  Hz), 109.2 (d,  $J = 15.1$  Hz), 88.4 (d,  $J = 3.4$  Hz), 80.9, 72.8, 13.1.  **$^{19}\text{F NMR}$**  (376 MHz, Chloroform- $d$ )  $\delta$  -108.7. **HRMS (ESI)**  $m/z$  calcd for  $\text{C}_{18}\text{H}_{13}\text{N}_2\text{NaO}_2\text{F}$   $[\text{M} + \text{Na}]^+$ : 331.0853, found: 331.0844.

### (S)-4-hydroxy-5-methyl-4-(naphthalen-2-ylethynyl)-2-phenyl-2,4-dihydro-3H-pyrazol-3-one (7o)

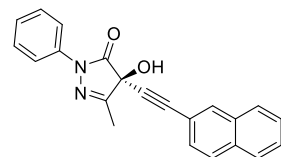

White solid, 32.6 mg, 96% yield. mp = 134.2–136.5 °C.  $[\alpha]_{\text{D}}^{25} = -312.4$  ( $c = 0.22$  in  $\text{CH}_2\text{Cl}_2$ ). 94% ee. **HPLC** (CHIRALCEL AD-H),  $n$ -hexane/2-propanol = 90/10, flow rate 0.8 mL/min, detection at 254 nm,  $t_{\text{R}} = 16.8$  min (minor), 19.8 min (major).  **$^1\text{H NMR}$**  (400 MHz, Chloroform- $d$ )  $\delta$  7.99 (s, 1H), 7.93 – 7.90 (m, 2H), 7.80 – 7.77 (m, 1H), 7.74 – 7.72 (m, 2H), 7.51 – 7.39 (m, 5H), 7.23 (d,  $J = 7.4$  Hz, 1H), 4.33 (s, 1H), 2.38 (s, 3H).  **$^{13}\text{C NMR}$**  (100 MHz, Chloroform- $d$ )  $\delta$  168.6, 157.5, 136.4, 132.3, 131.8, 131.6, 127.9, 127.1, 126.9, 126.8, 126.3, 125.7, 124.6, 117.9, 117.0, 88.3, 80.9, 72.0, 12.1. **HRMS (ESI)**  $m/z$  calcd for  $\text{C}_{22}\text{H}_{16}\text{N}_2\text{NaO}_2$   $[\text{M} + \text{Na}]^+$ : 363.1104, found: 363.1101.

### (S)-4-hydroxy-5-methyl-2-phenyl-4-(thiophen-3-ylethynyl)-2,4-dihydro-3H-pyrazol-3-one (7p)

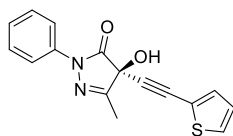

White solid, 27.5 mg, 93% yield. mp = 153.2–155.3 °C.  $[\alpha]_{\text{D}}^{25} = -252.4$  ( $c = 0.30$  in  $\text{CH}_2\text{Cl}_2$ ). 97% ee. **HPLC** (CHIRALCEL AD-H),  $n$ -hexane/2-propanol = 90/10, flow rate 0.8 mL/min, detection at 254 nm,  $t_{\text{R}} = 12.4$  min (minor), 16.3 min (major).  **$^1\text{H NMR}$**  (400 MHz, Chloroform- $d$ )  $\delta$  7.89 – 7.86 (m, 2H), 7.43 – 7.38 (m, 2H), 7.32 – 7.30 (m, 1H), 7.28 – 7.27 (m, 1H), 7.23 – 7.19 (m, 1H), 6.97 – 6.95 (m, 1H), 4.48 (s, 1H), 2.34 (s, 3H).  **$^{13}\text{C NMR}$**  (100 MHz, Chloroform- $d$ )  $\delta$  168.4, 157.4, 136.3, 133.2, 128.0, 127.9, 126.1, 124.6, 119.5, 118.0, 84.4, 81.4, 72.1, 12.1. **HRMS (ESI)**  $m/z$  calcd for  $\text{C}_{16}\text{H}_{12}\text{N}_2\text{NaO}_2\text{S}$   $[\text{M} + \text{Na}]^+$ : 319.0502, found: 319.0496.

### (S)-4-(cyclopropylethynyl)-4-hydroxy-5-methyl-2-phenyl-2,4-dihydro-3H-pyrazol-3-one (7q)

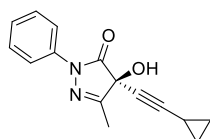

White solid, 18.3 mg, 72% yield. mp = 126.3–128.2 °C.  $[\alpha]_{\text{D}}^{25} = -224.6$  ( $c = 0.21$  in  $\text{CH}_2\text{Cl}_2$ ). 79% ee. **HPLC** (CHIRALCEL AD-H),  $n$ -hexane/2-propanol = 90/10, flow rate 0.8 mL/min, detection at 254 nm,  $t_{\text{R}} = 8.8$  min (minor), 11.7 min (major).  **$^1\text{H NMR}$**  (400 MHz, Chloroform- $d$ )  $\delta$  7.88 – 7.85 (m, 2H), 7.42 – 7.38 (m, 2H), 7.22 – 7.18 (m, 1H), 4.17 (s, 1H), 2.24 (s, 3H), 1.29 – 1.25 (m, 1H), 0.84 – 0.73 (m, 4H).  **$^{13}\text{C NMR}$**  (100 MHz, Chloroform- $d$ )  $\delta$  170.3, 159.3, 138.0, 129.3, 125.9, 119.3, 94.4, 73.0, 68.9, 13.3, 9.2, 9.1, 1.5. **HRMS (ESI)**  $m/z$  calcd for  $\text{C}_{15}\text{H}_{14}\text{N}_2\text{NaO}_2$   $[\text{M} + \text{Na}]^+$ : 277.0947, found: 277.0933.

### (S)-4-hydroxy-5-methyl-2-phenyl-4-(4-phenylbut-1-yn-1-yl)-2,4-dihydro-3H-pyrazol-3-one (7r)

## SUPPORTING INFORMATION

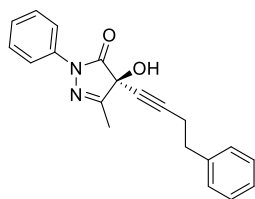

Yellow oil, 21.3 mg, 67% yield.  $[\alpha]_D^{25} = -101.7$  ( $c = 0.06$  in  $\text{CH}_2\text{Cl}_2$ ). 90% ee. **HPLC** (CHIRALCEL AD-H), *n*-hexane/2-propanol = 90/10, flow rate 0.8 mL/min, detection at 254 nm,  $t_R = 12.2$  min (minor), 16.4 min (major).  **$^1\text{H NMR}$**  (400 MHz, Chloroform-*d*)  $\delta$  7.80 – 7.77 (m, 2H), 7.35 – 7.30 (m, 2H), 7.21 – 7.17 (m, 2H), 7.15 – 7.07 (m, 4H), 4.01 (s, 1H), 2.73 (t,  $J = 7.4$  Hz, 2H), 2.46 (t,  $J = 7.4$  Hz, 2H), 2.09 (s, 3H).  **$^{13}\text{C NMR}$**  (100 MHz, Chloroform-*d*)  $\delta$  168.8, 157.8, 138.8, 136.5, 128.3, 127.9, 127.4, 125.5, 124.5, 117.9, 88.8, 73.3, 71.5, 33.2, 20.0, 11.8. **HRMS (ESI)**  $m/z$  calcd for  $\text{C}_{20}\text{H}_{18}\text{N}_2\text{NaO}_2$  [ $\text{M} + \text{Na}$ ] $^+$ : 341.1260, found: 341.1253.

### (S)-4-hydroxy-5-methyl-2-phenyl-4-(5-phenylpent-1-yn-1-yl)-2,4-dihydro-3H-pyrazol-3-one (7s)

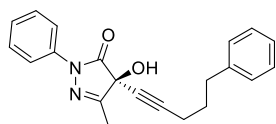

Yellow oil, 21.6 mg, 65% yield.  $[\alpha]_D^{25} = -3.87$  ( $c = 0.31$  in  $\text{CH}_2\text{Cl}_2$ ). 83% ee. **HPLC** (CHIRALCEL AD-H), *n*-hexane/2-propanol = 90/10, flow rate 0.8 mL/min, detection at 254 nm,  $t_R = 9.1$  min (minor), 10.4 min (major).  **$^1\text{H NMR}$**  (400 MHz, Chloroform-*d*)  $\delta$  7.80 – 7.78 (m, 2H), 7.33 – 7.29 (m, 2H), 7.20 – 7.16 (m, 2H), 7.14 – 7.10 (m, 2H), 7.07 – 7.05 (m, 2H), 4.18 (s, 1H), 2.60 (t,  $J = 7.3$  Hz, 2H), 2.19 (s, 3H), 2.15 (t,  $J = 7.3$  Hz, 2H), 1.79 – 1.72 (m, 2H).  **$^{13}\text{C NMR}$**  (100 MHz, Chloroform-*d*)  $\delta$  168.9, 157.9, 140.0, 136.5, 127.9, 127.5, 127.4, 125.0, 124.5, 117.9, 89.4, 73.0, 71.6, 33.7, 28.5, 17.2, 11.9. **HRMS (ESI)**  $m/z$  calcd for  $\text{C}_{21}\text{H}_{20}\text{N}_2\text{NaO}_2$  [ $\text{M} + \text{Na}$ ] $^+$ : 355.1417, found: 355.1407.

### (S)-4-(hex-1-yn-1-yl)-4-hydroxy-5-methyl-2-phenyl-2,4-dihydro-3H-pyrazol-3-one (7t)

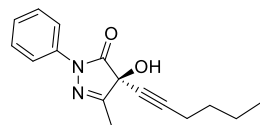

Yellow oil, 19.4 mg, 72% yield.  $[\alpha]_D^{25} = -177.7$  ( $c = 0.10$  in  $\text{CH}_2\text{Cl}_2$ ). 89% ee. **HPLC** (CHIRALCEL AD-H), *n*-hexane/2-propanol = 90/10, flow rate 0.8 mL/min, detection at 254 nm,  $t_R = 7.6$  min (minor), 9.7 min (major).  **$^1\text{H NMR}$**  (400 MHz, Chloroform-*d*)  $\delta$  7.89 – 7.86 (m, 2H), 7.42 – 7.38 (m, 2H), 7.22 – 7.18 (m, 1H), 4.48 (s, 1H), 2.26 (s, 3H), 2.23 (t,  $J = 7.1$  Hz, 2H), 1.52 – 1.45 (m, 2H), 1.40 – 1.32 (m, 2H), 0.87 (t,  $J = 7.1$  Hz, 3H).  **$^{13}\text{C NMR}$**  (100 MHz, Chloroform-*d*)  $\delta$  169.1, 158.1, 136.5, 127.9, 124.4, 117.9, 89.9, 72.3, 71.6, 29.0, 20.9, 17.5, 12.5, 11.8. **HRMS (ESI)**  $m/z$  calcd for  $\text{C}_{16}\text{H}_{18}\text{N}_2\text{NaO}_2$  [ $\text{M} + \text{Na}$ ] $^+$ : 293.1260, found: 293.1250.

### (S)-4-hydroxy-5-methyl-4-(phenylethynyl)-2-(p-tolyl)-2,4-dihydro-3H-pyrazol-3-one (8a)

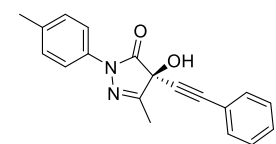

White solid, 27.4 mg, 90% yield. mp = 132.5–134.7 °C.  $[\alpha]_D^{25} = -242.1$  ( $c = 0.31$  in  $\text{CH}_2\text{Cl}_2$ ). 98% ee. **HPLC** (CHIRALCEL AD-H), *n*-hexane/2-propanol = 90/10, flow rate 0.8 mL/min, detection at 254 nm,  $t_R = 13.3$  min (minor), 24.5 min (major).  **$^1\text{H NMR}$**  (400 MHz, Chloroform-*d*)  $\delta$  7.90 – 7.87 (m, 2H), 7.43 – 7.36 (m, 2H), 7.28 – 7.25 (m, 2H), 7.21 – 7.14 (m, 3H), 4.31 (s, 1H), 2.34 – 2.29 (m, 6H).  **$^{13}\text{C NMR}$**  (100 MHz, Chloroform-*d*)  $\delta$  168.5, 157.6, 134.3, 134.0, 131.2, 128.4, 128.4, 119.8, 118.1, 118.0, 87.7, 80.8, 71.9, 20.0, 12.0. **HRMS (ESI)**  $m/z$  calcd for  $\text{C}_{19}\text{H}_{16}\text{N}_2\text{NaO}_2$  [ $\text{M} + \text{Na}$ ] $^+$ : 327.1108, found: 327.1105.

### (S)-2-(3,5-dimethylphenyl)-4-hydroxy-5-methyl-4-(phenylethynyl)-2,4-dihydro-3H-pyrazol-3-one (8b)

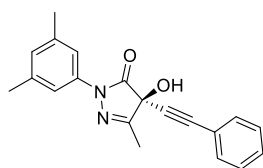

White solid, 27.0 mg, 85% yield. mp = 83.5–84.2 °C.  $[\alpha]_D^{25} = -297.0$  ( $c = 0.23$  in  $\text{CH}_2\text{Cl}_2$ ). 92% ee. **HPLC** (CHIRALCEL OD-H), *n*-hexane/2-propanol = 90/10, flow rate 0.8 mL/min, detection at 254 nm,  $t_R = 7.1$  min (minor), 12.7 min (major).  **$^1\text{H NMR}$**  (400 MHz, Chloroform-*d*)  $\delta$  7.42 (s, 2H), 7.36 – 7.34 (m, 2H), 7.28 – 7.24 (m, 1H), 7.21 – 7.17 (m, 2H), 6.78 (s, 1H), 4.27 (s, 1H), 2.29 – 2.26 (m, 9H).  **$^{13}\text{C NMR}$**  (100 MHz, Chloroform-*d*)  $\delta$  168.5, 157.4, 137.7, 136.2, 131.2, 128.5, 127.3, 126.4, 119.8, 115.8, 87.7, 80.8, 71.9, 20.4, 12.0. **HRMS (ESI)**  $m/z$  calcd for  $\text{C}_{20}\text{H}_{18}\text{N}_2\text{NaO}_2$  [ $\text{M} + \text{Na}$ ] $^+$ : 341.1260, found: 341.1257.

### (S)-4-hydroxy-5-methyl-4-(phenylethynyl)-2-(o-tolyl)-2,4-dihydro-3H-pyrazol-3-one (8c)

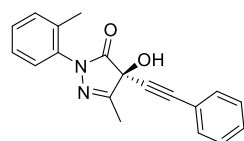

White solid, 27.1 mg, 89% yield. mp = 98.4–100.5 °C.  $[\alpha]_D^{25} = -227.8$  ( $c = 0.27$  in  $\text{CH}_2\text{Cl}_2$ ). 90% ee. **HPLC** (CHIRALCEL AD-H), *n*-hexane/2-propanol = 90/10, flow rate 0.8 mL/min, detection at 254 nm,  $t_R = 9.5$  min (minor), 11.1 min (major).  **$^1\text{H NMR}$**  (400 MHz, Chloroform-*d*)  $\delta$  7.70 – 7.67 (m, 2H), 7.46 – 7.43 (m, 2H), 7.35 – 7.33 (m, 1H), 7.31 – 7.29 (m, 3H), 7.04 – 7.02 (m, 1H), 4.49 (s, 1H), 2.39 (s, 3H), 2.34 (s, 3H).  **$^{13}\text{C NMR}$**  (100 MHz, Chloroform-*d*)  $\delta$  168.7, 157.6, 137.9, 136.3, 131.2, 128.5, 127.7, 127.3, 125.4, 119.8, 118.6, 115.2, 87.9, 80.7, 71.9, 20.5, 12.0. **HRMS (ESI)**  $m/z$  calcd for  $\text{C}_{19}\text{H}_{16}\text{N}_2\text{NaO}_2$  [ $\text{M} + \text{Na}$ ] $^+$ : 327.1104, found: 327.1095.



## SUPPORTING INFORMATION

### (S)-4-hydroxy-2-(4-methoxyphenyl)-5-methyl-4-(phenylethynyl)-2,4-dihydro-3H-pyrazol-3-one (8d)

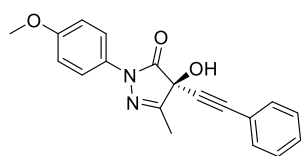

White solid, 28.8 mg, 90% yield. mp = 156.8–158.5 °C.  $[\alpha]_D^{25} = -51.49$  ( $c = 0.16$  in  $\text{CH}_2\text{Cl}_2$ ). 76% ee.

**HPLC** (CHIRALCEL OD-H), *n*-hexane/2-propanol = 90/10, flow rate 0.8 mL/min, detection at 254 nm,  $t_R = 19.5$  min (minor), 10.5 min (major).  **$^1\text{H NMR}$**  (600 MHz, Chloroform-*d*)  $\delta$  7.78 – 7.76 (m, 2H), 7.46 – 7.44 (m, 2H), 7.37 – 7.27 (m, 3H), 6.94 – 6.92 (m, 2H), 4.73 (s, 1H), 3.83 (s, 3H), 2.34 (s, 3H).  **$^{13}\text{C NMR}$**  (150 MHz, Chloroform-*d*)  $\delta$  169.4, 158.6, 157.3, 132.2, 130.7, 129.5, 128.3, 120.9, 114.1, 88.8,

81.8, 72.8, 55.5, 13.0. **HRMS (ESI)**  $m/z$  calcd for  $\text{C}_{19}\text{H}_{16}\text{N}_2\text{NaO}_3$   $[\text{M} + \text{Na}]^+$ : 343.1053, found: 343.1052.

### (S)-2-(4-fluorophenyl)-4-hydroxy-5-methyl-4-(phenylethynyl)-2,4-dihydro-3H-pyrazol-3-one (8e)

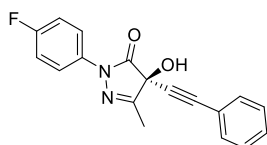

White solid, 28.3 mg, 92% yield. mp = 126.5–128.8 °C.  $[\alpha]_D^{25} = -268.3$  ( $c = 0.22$  in  $\text{CH}_2\text{Cl}_2$ ). 88% ee.

**HPLC** (CHIRALCEL AD-H), *n*-hexane/2-propanol = 90/10, flow rate 0.8 mL/min, detection at 254 nm,  $t_R = 9.3$  min (minor), 10.6 min (major).  **$^1\text{H NMR}$**  (400 MHz, Chloroform-*d*)  $\delta$  7.75 – 7.67 (m, 2H), 7.47 – 7.44 (m, 2H), 7.38 – 7.28 (m, 4H), 6.93 – 6.88 (m, 1H), 4.25 (s, 1H), 2.34 (s, 3H).  **$^{13}\text{C NMR}$**  (100 MHz, Chloroform-*d*)  $\delta$  168.5, 161.8 (d,  $J = 245.1$  Hz), 157.7, 137.8 (d,  $J = 10.8$  Hz), 131.2, 129.2 (d,  $J = 9.1$  Hz), 128.7, 127.4, 119.6, 113.0 (d,  $J = 3.1$  Hz), 111.2 (d,  $J = 21.2$  Hz), 105.2 (d,  $J = 27.2$  Hz), 88.2, 80.3, 71.9, 12.0.  **$^{19}\text{F NMR}$**  (376 MHz, Chloroform-*d*)  $\delta$  -111.1. **HRMS (ESI)**  $m/z$  calcd for  $\text{C}_{18}\text{H}_{13}\text{N}_2\text{NaO}_2\text{F}$   $[\text{M} + \text{Na}]^+$ : 331.0853, found: 331.0859.

### (S)-2-(4-bromophenyl)-4-hydroxy-5-methyl-4-(phenylethynyl)-2,4-dihydro-3H-pyrazol-3-one (8f)

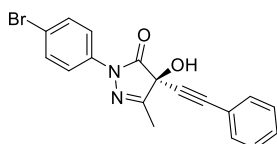

White solid, 24.4 mg, 91% yield. mp = 115.3–117.5 °C.  $[\alpha]_D^{25} = -220.6$  ( $c = 0.25$  in  $\text{CH}_2\text{Cl}_2$ ). 89% ee.

**HPLC** (CHIRALCEL AD-H), *n*-hexane/2-propanol = 90/10, flow rate 0.8 mL/min, detection at 254 nm,  $t_R = 11.7$  min (minor), 18.3 min (major).  **$^1\text{H NMR}$**  (400 MHz, Chloroform-*d*)  $\delta$  7.73 – 7.70 (m, 2H), 7.43 – 7.40 (m, 2H), 7.37 – 7.34 (m, 2H), 7.30 – 7.26 (m, 1H), 7.23 – 7.18 (m, 2H), 4.70 (s, 1H), 2.26 (s, 3H).  **$^{13}\text{C NMR}$**  (100 MHz, Chloroform-*d*)  $\delta$  168.7, 158.0, 135.5, 131.2, 130.9, 128.6, 127.4, 119.6, 119.3, 117.5,

88.1, 80.4, 71.9, 12.0. **HRMS (ESI)**  $m/z$  calcd for  $\text{C}_{18}\text{H}_{12}\text{N}_2\text{NaO}_2\text{Br}$   $[\text{M} + \text{Na}]^+$ : 389.9985, found: 389.9980.

### (S)-4-hydroxy-5-methyl-4-(phenylethynyl)-2-(4-(trifluoromethyl)phenyl)-2,4-dihydro-3H-pyrazol-3-one (8g)

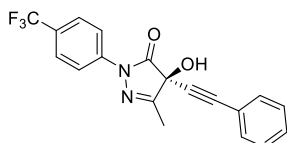

White solid, 32.2 mg, 90% yield. mp = 172.5–173.5 °C.  $[\alpha]_D^{25} = -232.5$  ( $c = 0.27$  in  $\text{CH}_2\text{Cl}_2$ ). 79% ee.

**HPLC** (CHIRALCEL AD-H), *n*-hexane/2-propanol = 90/10, flow rate 0.8 mL/min, detection at 254 nm,  $t_R = 11.0$  min (minor), 16.5 min (major).  **$^1\text{H NMR}$**  (400 MHz, Chloroform-*d*)  $\delta$  8.06 (d,  $J = 8.5$  Hz, 2H), 7.65 (d,  $J = 8.5$  Hz, 2H), 7.46 – 7.44 (m, 2H), 7.39 – 7.28 (m, 3H), 4.37 (s, 1H), 2.36 (s, 3H).  **$^{13}\text{C NMR}$**  (100 MHz, Chloroform-*d*)  $\delta$  168.9, 158.1, 139.2, 131.2, 128.8, 127.4, 126.1 (d,  $J = 32.9$  Hz), 125.1 (q,  $J = 3.8$  Hz), 123.0 (d,  $J = 271.7$  Hz), 119.5, 117.4, 88.4, 80.2, 71.9, 12.1.  **$^{19}\text{F NMR}$**  (376 MHz, Chloroform-*d*)  $\delta$  -62.2. **HRMS (ESI)**  $m/z$  calcd for  $\text{C}_{19}\text{H}_{13}\text{N}_2\text{NaO}_2\text{F}_3$   $[\text{M} + \text{Na}]^+$ : 381.0821, found: 381.0812.

### (S)-2-(4-benzylphenyl)-4-hydroxy-5-methyl-4-(phenylethynyl)-2,4-dihydro-3H-pyrazol-3-one (8h)

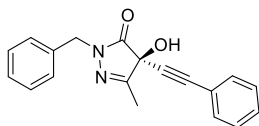

White solid, 24.3 mg, 80% yield. mp = 95.3–96.3 °C.  $[\alpha]_D^{25} = -157.9$  ( $c = 0.11$  in  $\text{CH}_2\text{Cl}_2$ ). 78% ee. **HPLC**

(CHIRALCEL AD-H), *n*-hexane/2-propanol = 90/10, flow rate 0.8 mL/min, detection at 254 nm,  $t_R = 16.9$  min (minor), 20.3 min (major).  **$^1\text{H NMR}$**  (400 MHz, Chloroform-*d*)  $\delta$  7.45 – 7.43 (m, 2H), 7.36 – 7.34 (m, 1H), 7.33 – 7.28 (m, 7H), 4.82 (s, 2H), 4.42 (s, 1H), 2.21 (s, 3H).  **$^{13}\text{C NMR}$**  (100 MHz, Chloroform-*d*)  $\delta$

170.4, 157.4, 134.7, 131.2, 128.4, 127.7, 127.3, 127.0, 126.8, 119.9, 87.5, 80.7, 70.8, 47.2, 11.9. **HRMS (ESI)**  $m/z$  calcd for  $\text{C}_{19}\text{H}_{16}\text{N}_2\text{NaO}_2$   $[\text{M} + \text{Na}]^+$ : 327.1104, found: 327.1088.

### (S)-5-ethyl-4-hydroxy-4-(phenylethynyl)-2-(o-tolyl)-2,4-dihydro-3H-pyrazol-3-one (8i)

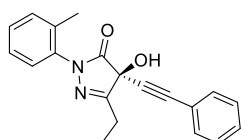

White solid, 27.3 mg, 88% yield. mp = 85.2–87.2 °C.  $[\alpha]_D^{25} = -251.6$  ( $c = 0.15$  in  $\text{CH}_2\text{Cl}_2$ ). 86% ee. **HPLC**

(CHIRALCEL AD-H), *n*-hexane/2-propanol = 90/10, flow rate 0.8 mL/min, detection at 254 nm,  $t_R = 8.6$  min (minor), 10.5 min (major).  **$^1\text{H NMR}$**  (400 MHz, Chloroform-*d*)  $\delta$  7.64 – 7.61 (m, 2H), 7.38 – 7.36 (m, 2H), 7.29 – 7.18 (m, 4H), 6.95 (d,  $J = 7.6$  Hz, 1H), 3.96 (s, 1H), 2.67 (q,  $J = 7.4$  Hz, 2H), 2.32 (s, 3H), 1.32 (t,  $J$

## SUPPORTING INFORMATION

= 7.4 Hz, 3H). **<sup>13</sup>C NMR** (100 MHz, Chloroform-*d*) δ 168.6, 161.0, 137.9, 136.5, 131.1, 128.5, 127.7, 127.3, 125.4, 119.8, 118.5, 115.2, 87.7, 81.1, 71.9, 20.6, 20.1, 8.7. **HRMS (ESI)** *m/z* calcd for C<sub>20</sub>H<sub>18</sub>N<sub>2</sub>NaO<sub>2</sub> [M + Na]<sup>+</sup>: 341.1260, found: 341.1257.

### (S)-2-(4-bromophenyl)-5-ethyl-4-hydroxy-4-(phenylethynyl)-2,4-dihydro-3H-pyrazol-3-one (8j)

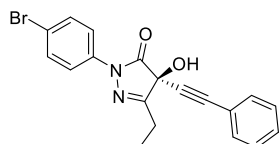

White solid, 34.8 mg, 91% yield. mp = 169.8–171.3 °C. [α]<sub>D</sub><sup>25</sup> = -236.1 (*c* = 0.23 in CH<sub>2</sub>Cl<sub>2</sub>). 98% ee.

**HPLC** (CHIRALCEL AD-H), *n*-hexane/2-propanol = 90/10, flow rate 0.8 mL/min, detection at 254 nm, *t<sub>R</sub>* = 12.9 min (minor), 23.1 min (major). **<sup>1</sup>H NMR** (400 MHz, Chloroform-*d*) δ 7.82 (d, *J* = 8.5 Hz, 2H), 7.50 (d, *J* = 8.5 Hz, 2H), 7.44 – 7.42 (m, 2H), 7.38 – 7.34 (m, 1H), 7.31 – 7.26 (m, 2H), 4.43 (s, 1H), 2.75 (q, *J* = 7.4 Hz, 2H), 1.39 (t, *J* = 7.4 Hz, 3H). **<sup>13</sup>C NMR** (150 MHz, Chloroform-*d*) δ 169.7, 162.7,

136.6, 132.1, 131.9, 129.6, 128.4, 120.7, 120.3, 118.4, 89.0, 81.8, 72.9, 21.1, 9.6. **HRMS (ESI)** *m/z* calcd for C<sub>19</sub>H<sub>15</sub>N<sub>2</sub>NaO<sub>2</sub>Br [M + Na]<sup>+</sup>: 405.0209, found: 405.0211.

### (S)-4-hydroxy-5-isopropyl-2-phenyl-4-(phenylethynyl)-2,4-dihydro-3H-pyrazol-3-one (8k)

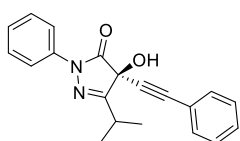

White solid, 28.6 mg, 90% yield. mp = 130.9–133.2 °C. [α]<sub>D</sub><sup>25</sup> = -186.7 (*c* = 0.21 in CH<sub>2</sub>Cl<sub>2</sub>). 93% ee. **HPLC**

(CHIRALCEL AD-H), *n*-hexane/2-propanol = 90/10, flow rate 0.8 mL/min, detection at 254 nm, *t<sub>R</sub>* = 10.3 min (minor), 15.3 min (major). **<sup>1</sup>H NMR** (400 MHz, Chloroform-*d*) δ 7.83 – 7.81 (m, 2H), 7.37 – 7.29 (m, 4H), 7.27

– 7.22 (m, 1H), 7.20 – 7.16 (m, 2H), 7.13 – 7.09 (m, 1H), 4.65 (d, *J* = 20.4 Hz, 1H), 3.02 – 3.00 (m, 1H), 1.39 – 1.31 (m, 6H). **<sup>13</sup>C NMR** (100 MHz, Chloroform-*d*) δ 168.7, 164.0, 136.6, 131.1, 128.4, 127.9, 127.3, 124.5, 120.0, 117.9, 87.9, 81.4, 72.1, 28.0, 19.7, 19.1. **HRMS (ESI)** *m/z* calcd for C<sub>20</sub>H<sub>18</sub>N<sub>2</sub>NaO<sub>2</sub> [M + Na]<sup>+</sup>: 341.1260, found: 341.1254.

### (S)-5-(tert-butyl)-4-hydroxy-2-phenyl-4-(phenylethynyl)-2,4-dihydro-3H-pyrazol-3-one (8l)

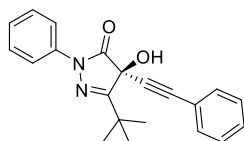

White solid, 27.2 mg, 82% yield. mp = 135.2–138.7 °C. [α]<sub>D</sub><sup>25</sup> = -104.1 (*c* = 0.17 in CH<sub>2</sub>Cl<sub>2</sub>). 75% ee. **HPLC**

(CHIRALCEL AD-H), *n*-hexane/2-propanol = 90/10, flow rate 0.8 mL/min, detection at 254 nm, *t<sub>R</sub>* = 10.2 min (minor), 17.2 min (major). **<sup>1</sup>H NMR** (400 MHz, Chloroform-*d*) δ 7.84 – 7.82 (m, 2H), 7.35 – 7.29 (m, 4H),

7.25 – 7.09 (m, 4H), 4.38 (s, 1H), 1.42 (s, 9H). **<sup>13</sup>C NMR** (100 MHz, Chloroform-*d*) δ 169.0, 165.5, 136.6, 131.0, 128.3, 127.8, 127.3, 124.4, 120.1, 117.9, 88.1, 82.0, 72.3, 35.4, 27.9. **HRMS (ESI)** *m/z* calcd for C<sub>21</sub>H<sub>20</sub>N<sub>2</sub>NaO<sub>2</sub> [M + Na]<sup>+</sup>: 355.1417, found: 355.1412.

### (S)-4-hydroxy-2,5-diphenyl-4-(phenylethynyl)-2,4-dihydro-3H-pyrazol-3-one (8m)

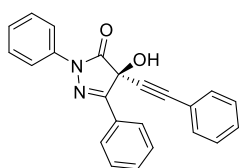

White solid, 31.7 mg, 90% yield. mp = 204.3–207.8 °C. [α]<sub>D</sub><sup>25</sup> = -51.1 (*c* = 0.16 in CH<sub>2</sub>Cl<sub>2</sub>). 80% ee. **HPLC**

(CHIRALCEL OD-H), *n*-hexane/2-propanol = 90/10, flow rate 0.8 mL/min, detection at 254 nm, *t<sub>R</sub>* = 8.5 min (minor), 10.6 min (major). **<sup>1</sup>H NMR** (400 MHz, DMSO-*d*<sub>6</sub>) δ 8.19 – 8.16 (m, 2H), 7.96 – 7.94 (m, 2H), 7.59 –

7.51 (m, 5H), 7.45 – 7.37 (m, 5H), 7.33 – 7.31 (m, 1H). **<sup>13</sup>C NMR** (100 MHz, DMSO-*d*<sub>6</sub>) δ 169.9, 156.5, 137.8, 132.2, 131.7, 130.3, 129.7, 129.5, 129.4, 128.8, 127.4, 126.2, 120.7, 119.1, 88.4, 84.3, 72.0. **HRMS (ESI)** *m/z* calcd for C<sub>23</sub>H<sub>16</sub>N<sub>2</sub>NaO<sub>2</sub> [M + Na]<sup>+</sup>: 375.1104, found: 375.1091.

### 3. Reference

- (1) Jiang, B. Chen, Z. Xiong, W., *Chem. Commun.*, **2002**, 1524–1525.
- (2) Chen, L. Huang, G. Liu, M. Huang, Z. Chen, F.-E. *Adv. Syn. Catal.*, **2018**, 360, 3497–3501.
- (3) Wang, R. H. Li, Y. L. He, H. J. Xiao, Y. C.; Chen, F. E. *Chem. Eur. J.*, **2021**, 27, 4302–4306.
- (4) Lu, J. Luo, L. S. Sha, F. Li, Q. Wu, X. Y. *Chem. Commun.*, **2019**, 55, 11603–11606.

# SUPPORTING INFORMATION

## 4. Spectral Data

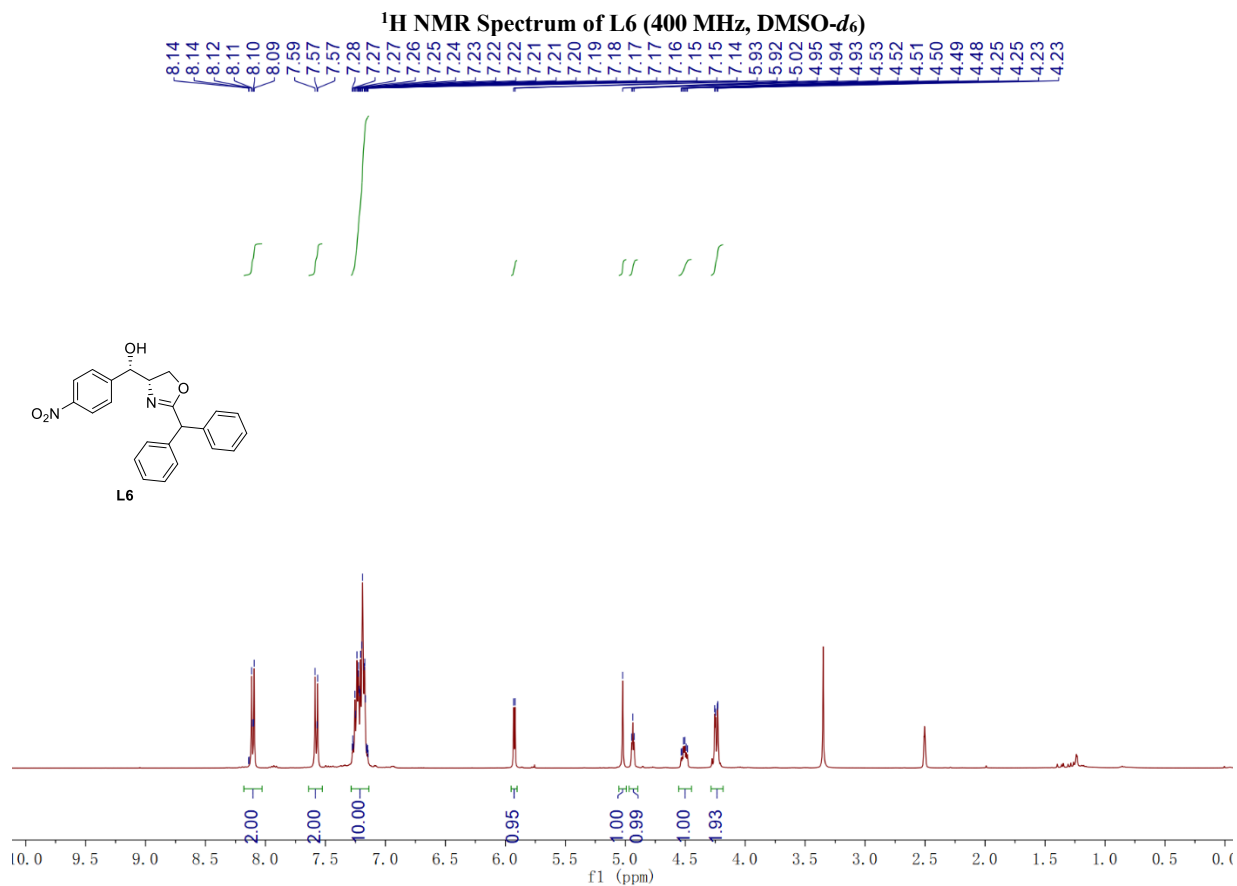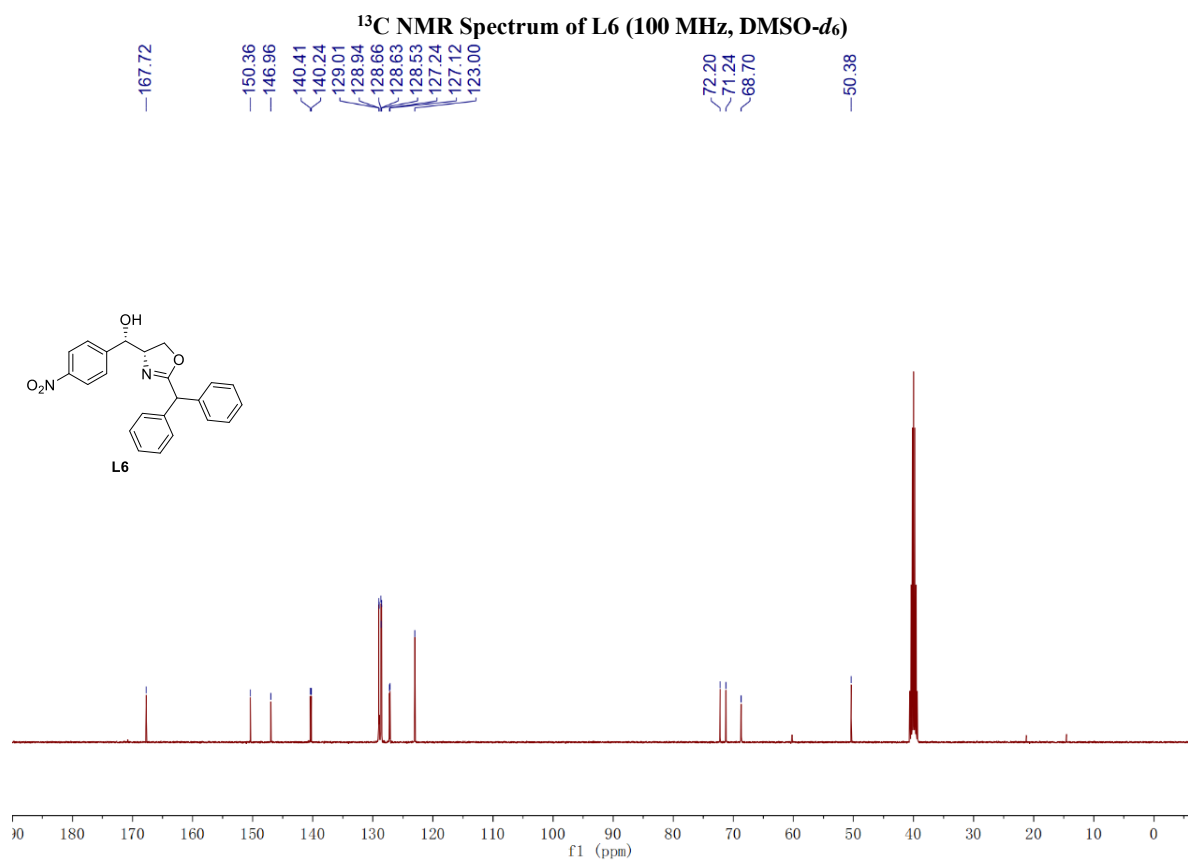

# SUPPORTING INFORMATION

**<sup>1</sup>H NMR Spectrum of L7 (400 MHz, DMSO-*d*<sub>6</sub>)**

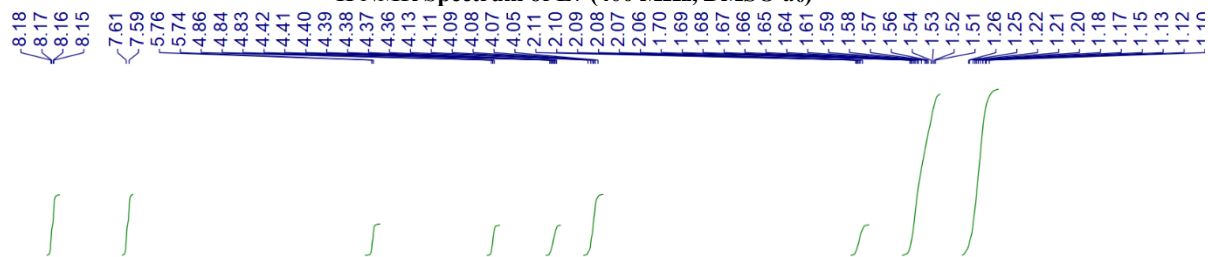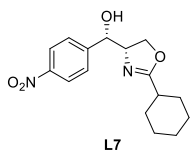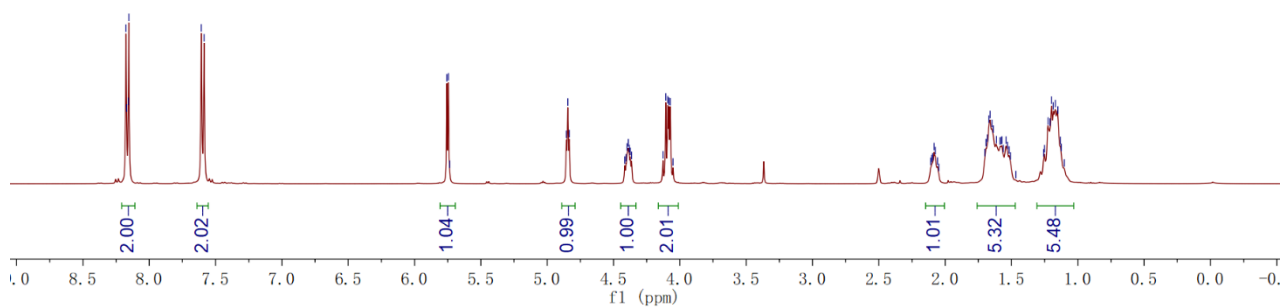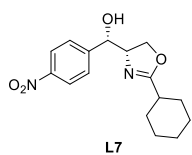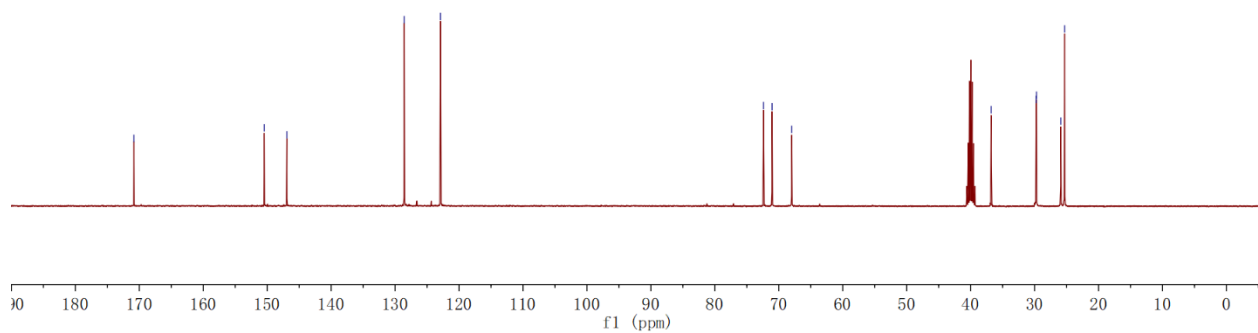

# SUPPORTING INFORMATION

**<sup>1</sup>H NMR Spectrum of Compound 7a (400 MHz, CDCl<sub>3</sub>)**

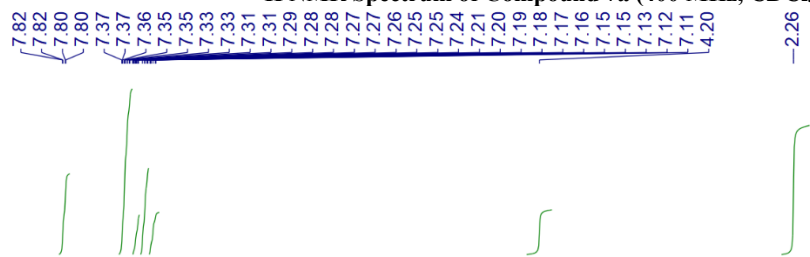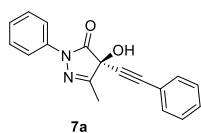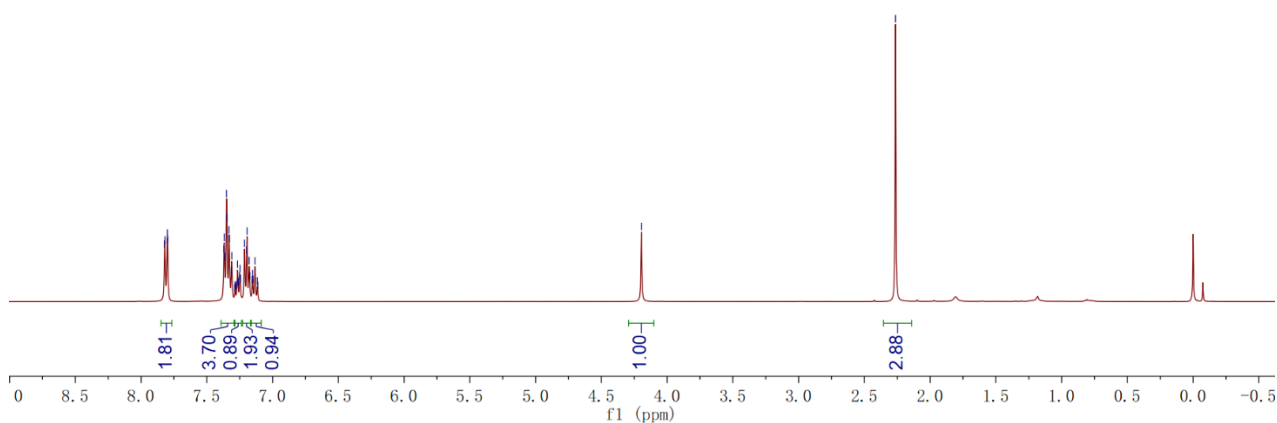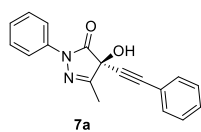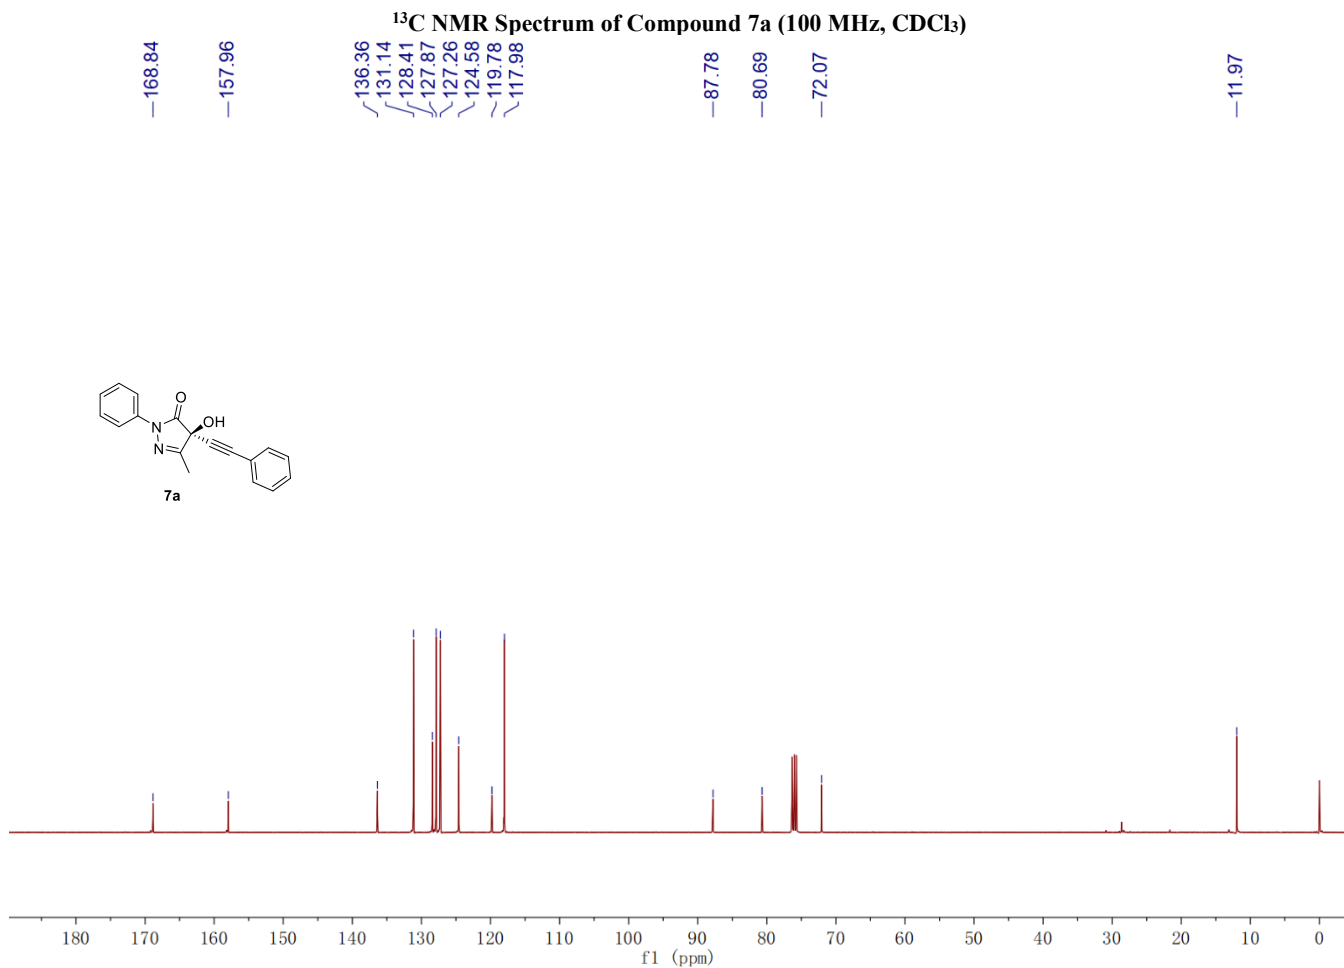

# SUPPORTING INFORMATION

**<sup>1</sup>H NMR Spectrum of Compound 7b (400 MHz, CDCl<sub>3</sub>)**

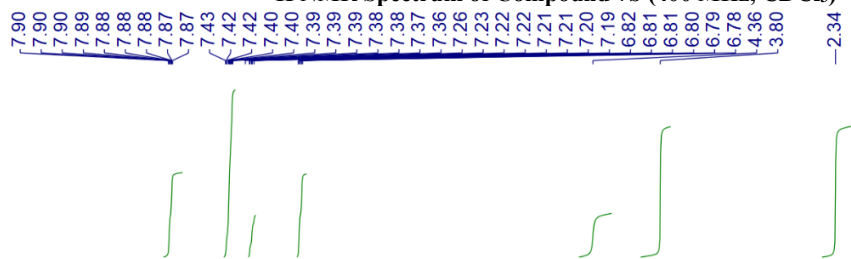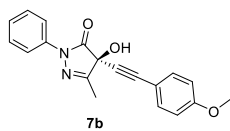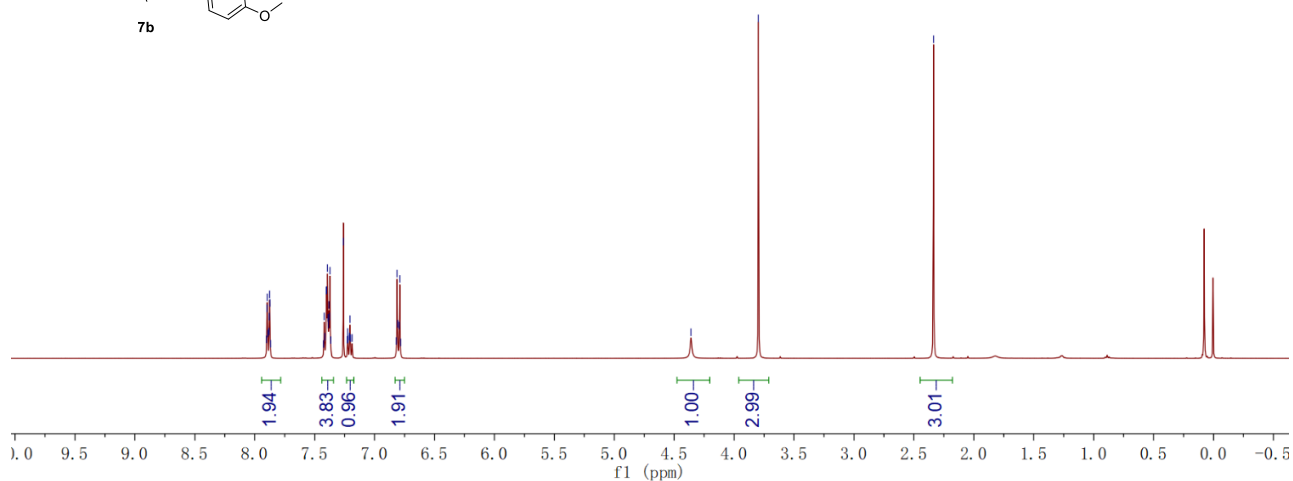

**<sup>13</sup>C NMR Spectrum of Compound 7b (100 MHz, CDCl<sub>3</sub>)**

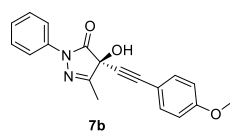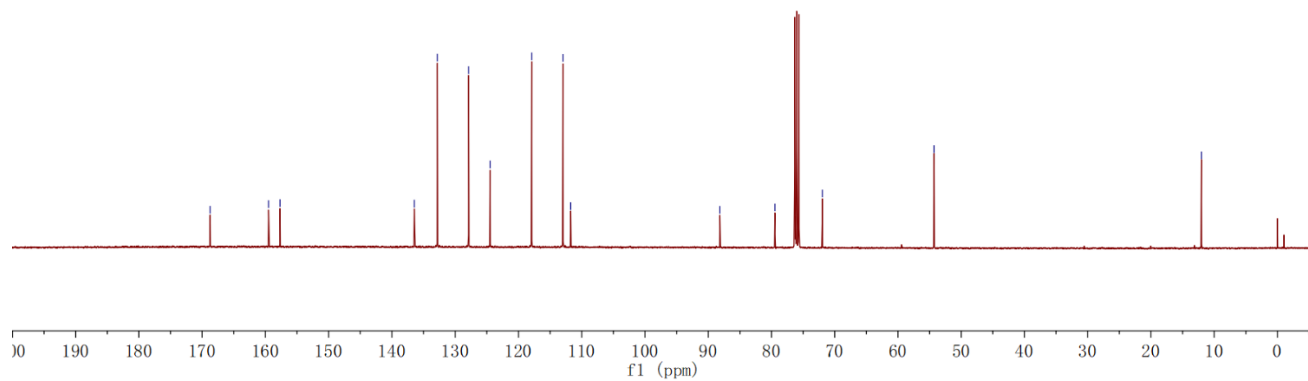

# SUPPORTING INFORMATION

**<sup>1</sup>H NMR Spectrum of Compound 7c (400 MHz, CDCl<sub>3</sub>)**

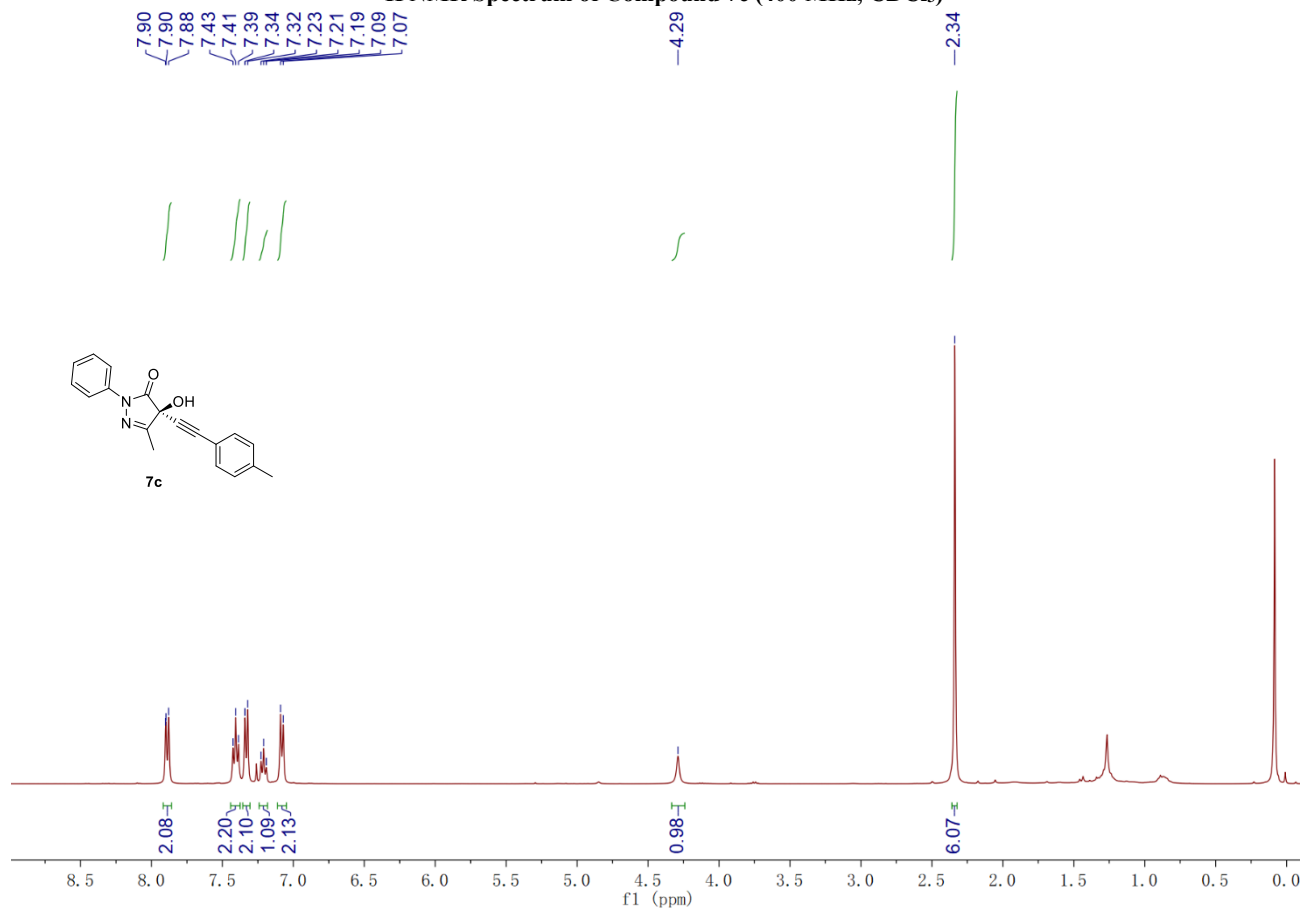

**<sup>13</sup>C NMR Spectrum of Compound 7c (100 MHz, CDCl<sub>3</sub>)**

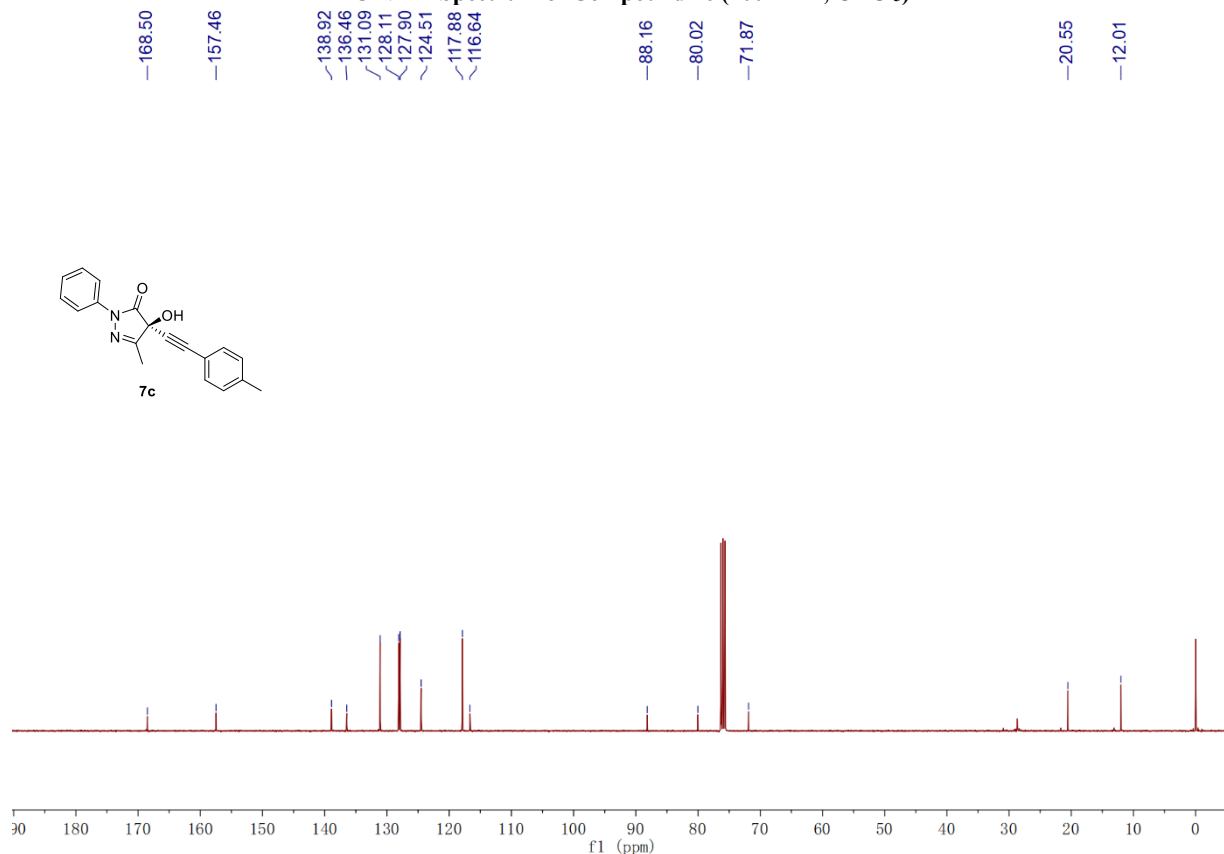



# SUPPORTING INFORMATION

<sup>1</sup>H NMR Spectrum of Compound 7d (400 MHz, CDCl<sub>3</sub>)

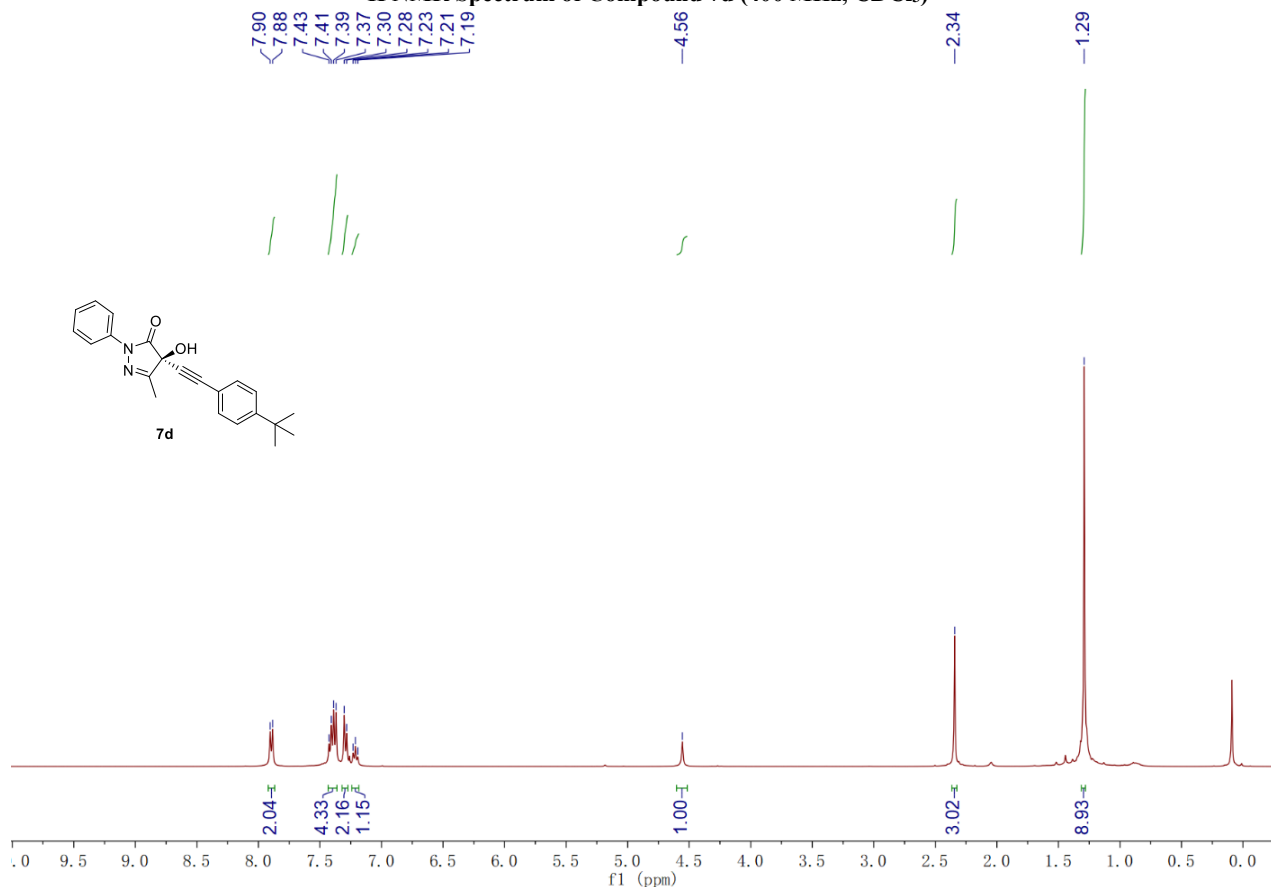

<sup>13</sup>C NMR Spectrum of Compound 7d (100 MHz, CDCl<sub>3</sub>)

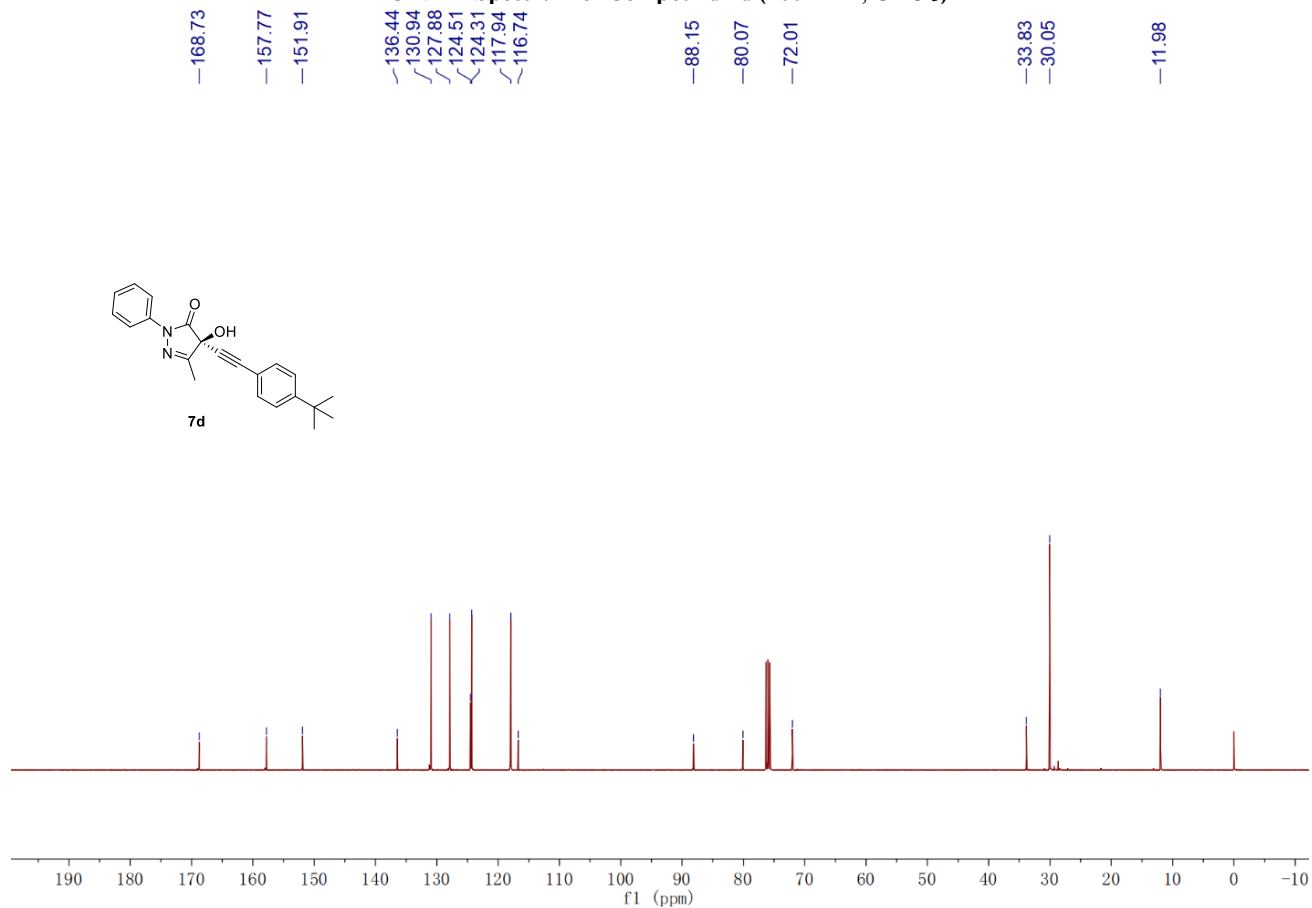

# SUPPORTING INFORMATION

**<sup>1</sup>H NMR Spectrum of Compound 7e (400 MHz, CDCl<sub>3</sub>)**

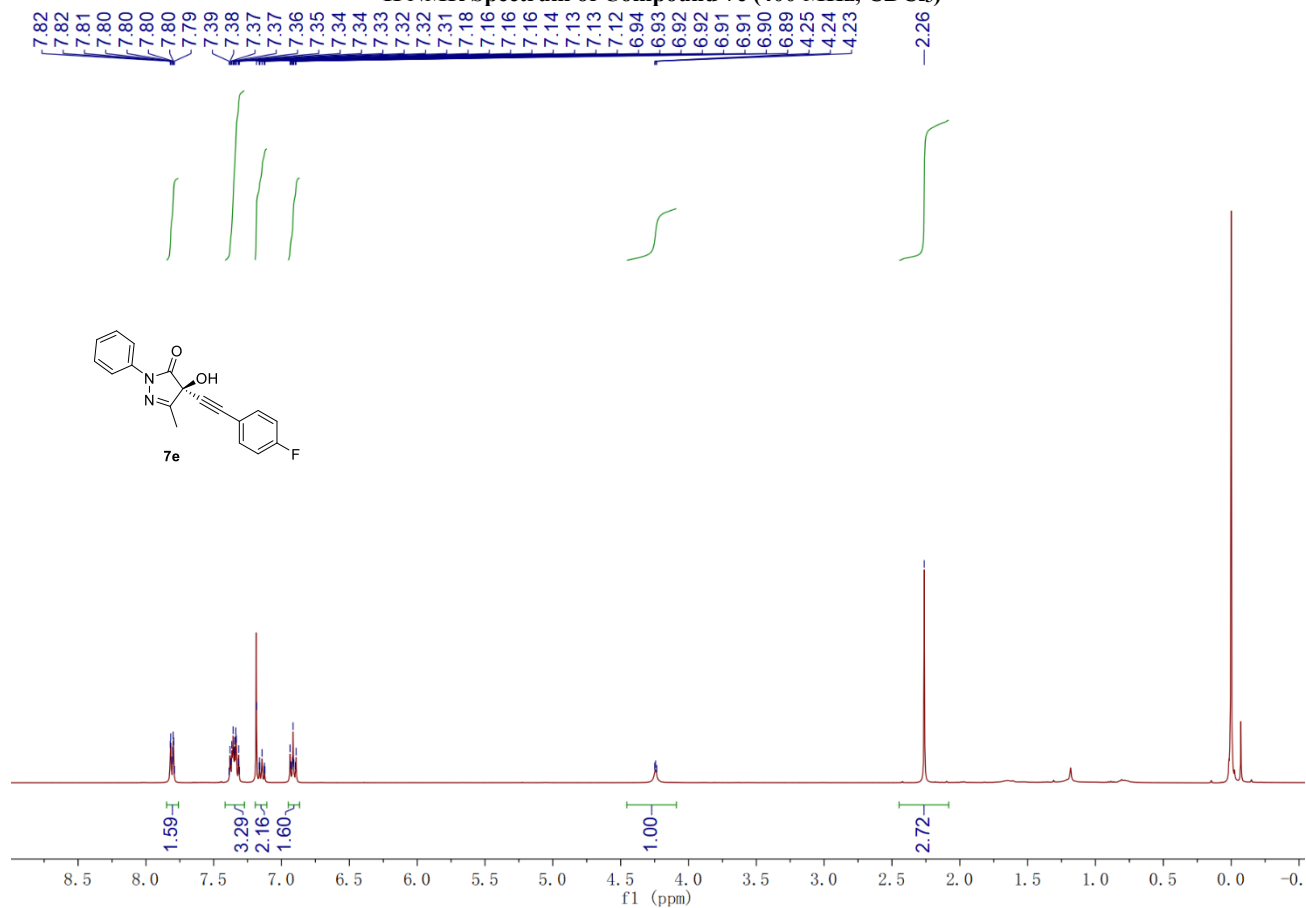

**<sup>13</sup>C NMR Spectrum of Compound 7e (100 MHz, CDCl<sub>3</sub>)**

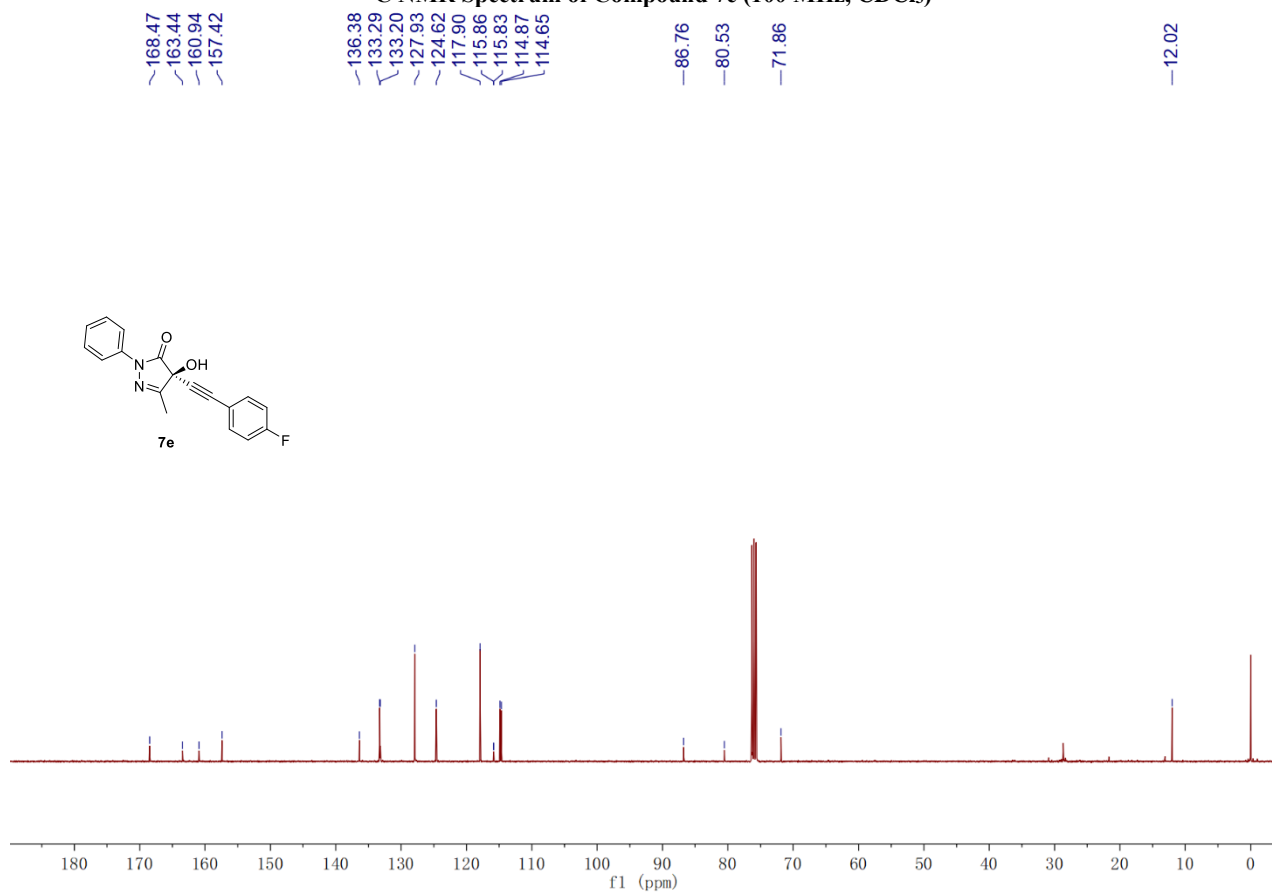

# SUPPORTING INFORMATION

## $^{19}\text{F}$ NMR Spectrum of Compound 7e (376 MHz, $\text{CDCl}_3$ )

---108.39

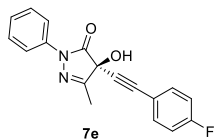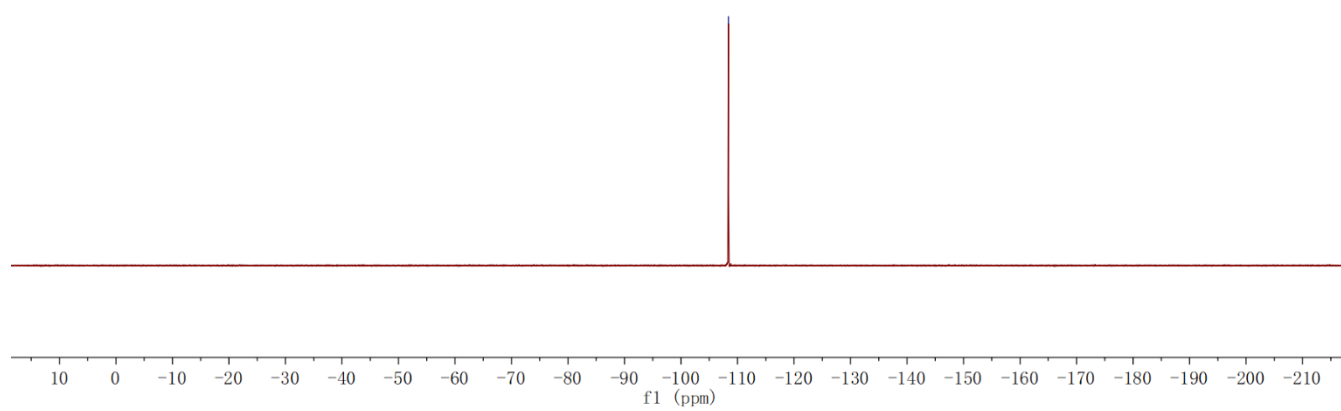

# SUPPORTING INFORMATION

**<sup>1</sup>H NMR Spectrum of Compound 7f (400 MHz, CDCl<sub>3</sub>)**

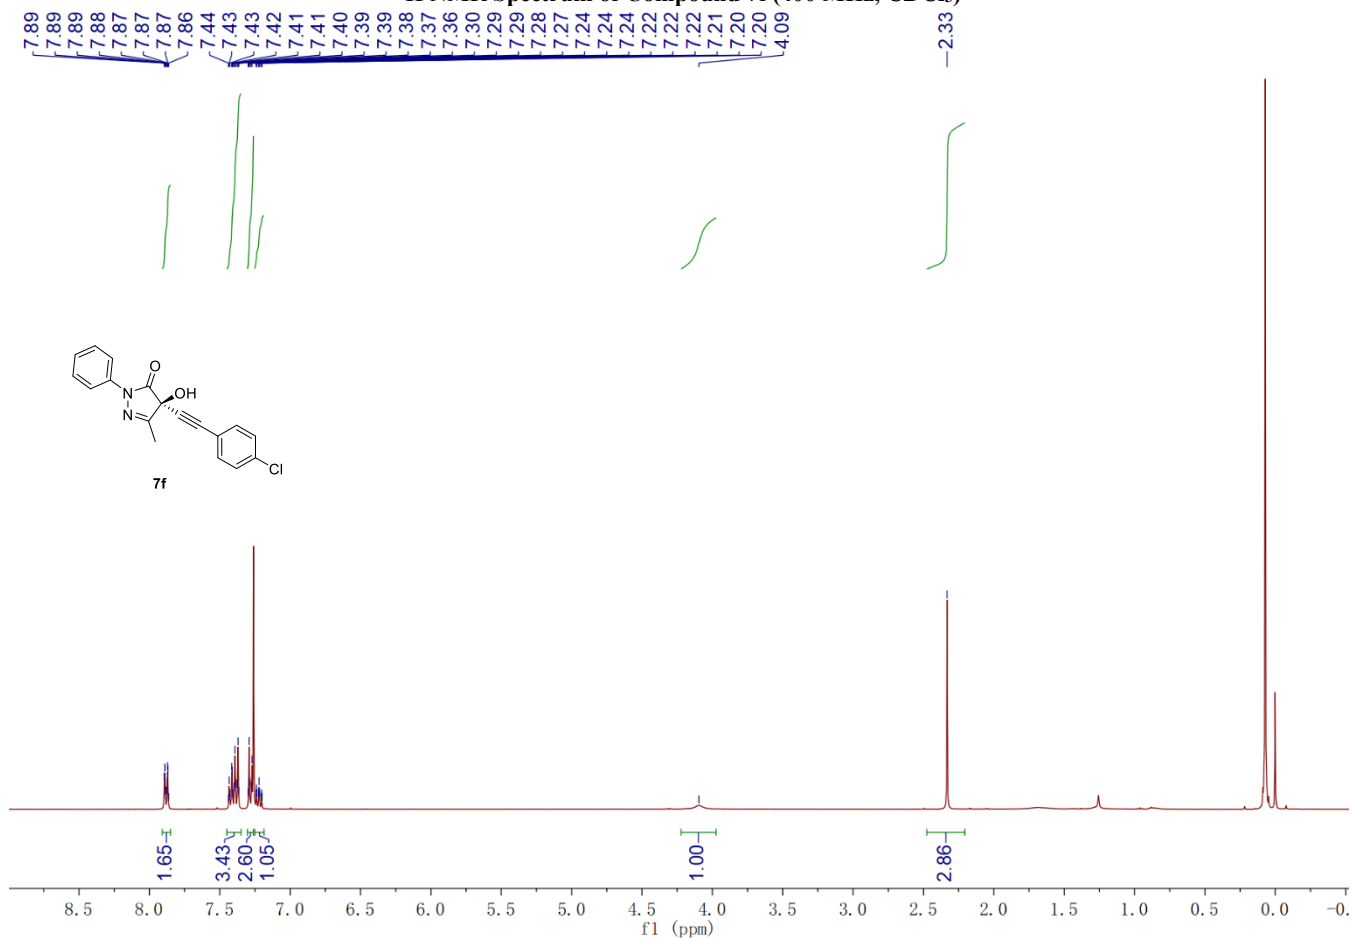

**<sup>13</sup>C NMR Spectrum of Compound 7f (100 MHz, CDCl<sub>3</sub>)**

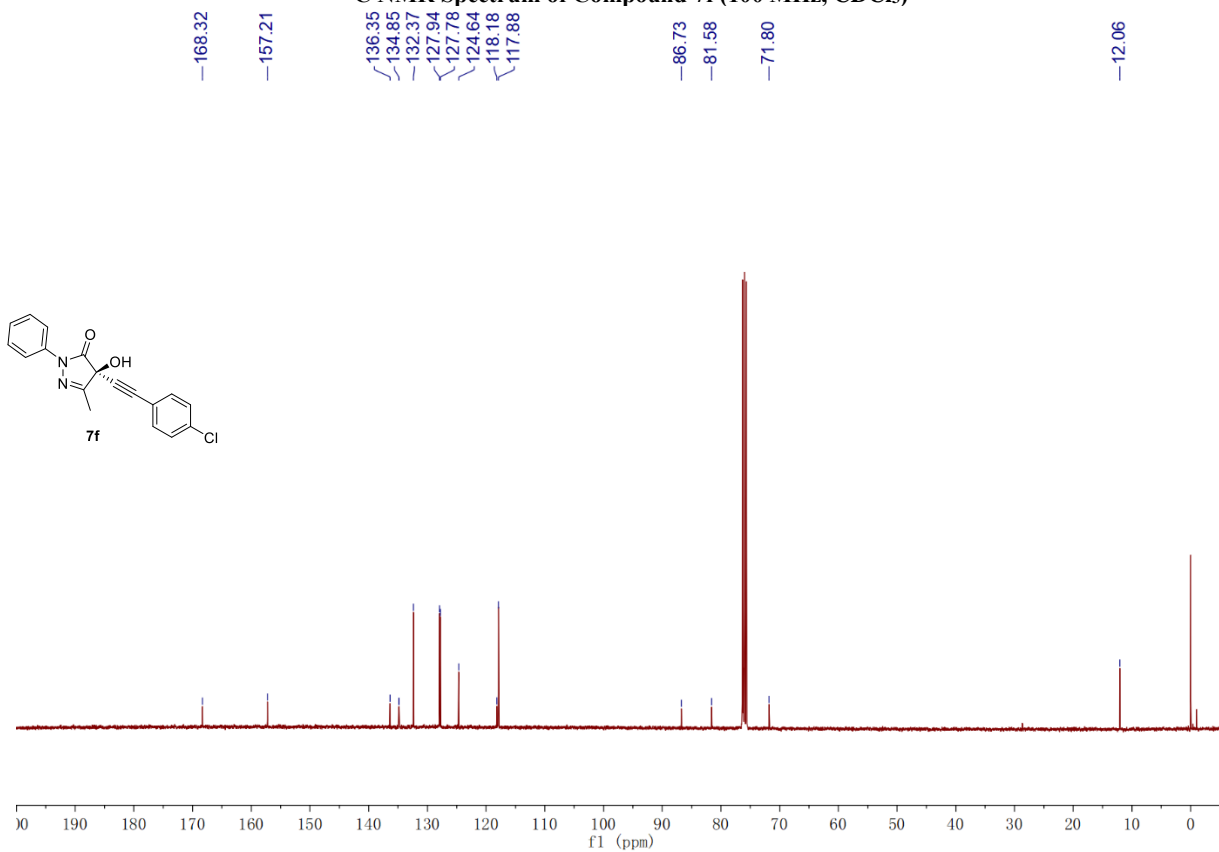

# SUPPORTING INFORMATION

<sup>1</sup>H NMR Spectrum of Compound 7g (400 MHz, CDCl<sub>3</sub>)

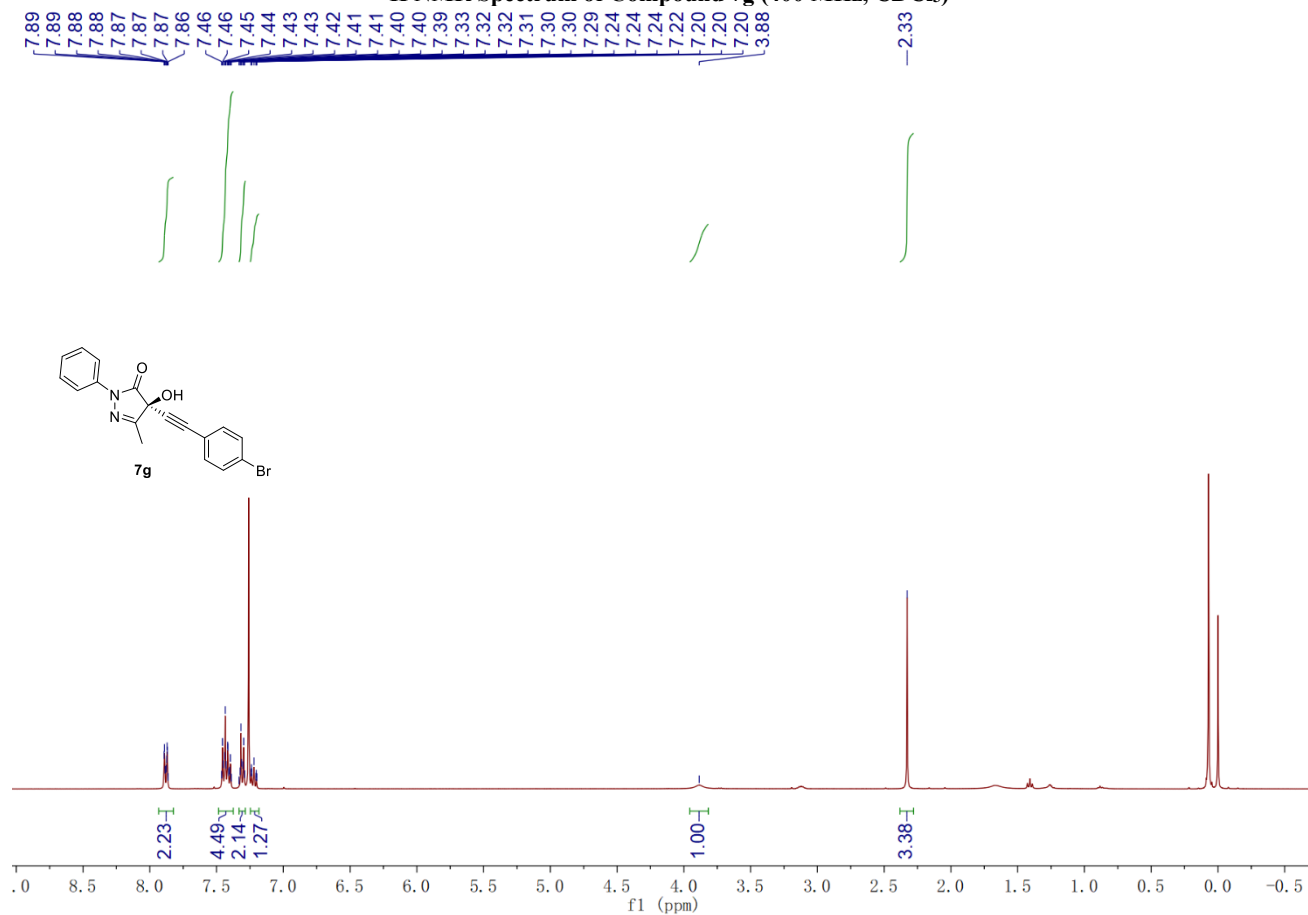

<sup>13</sup>C NMR Spectrum of Compound 7g (100 MHz, CDCl<sub>3</sub>)

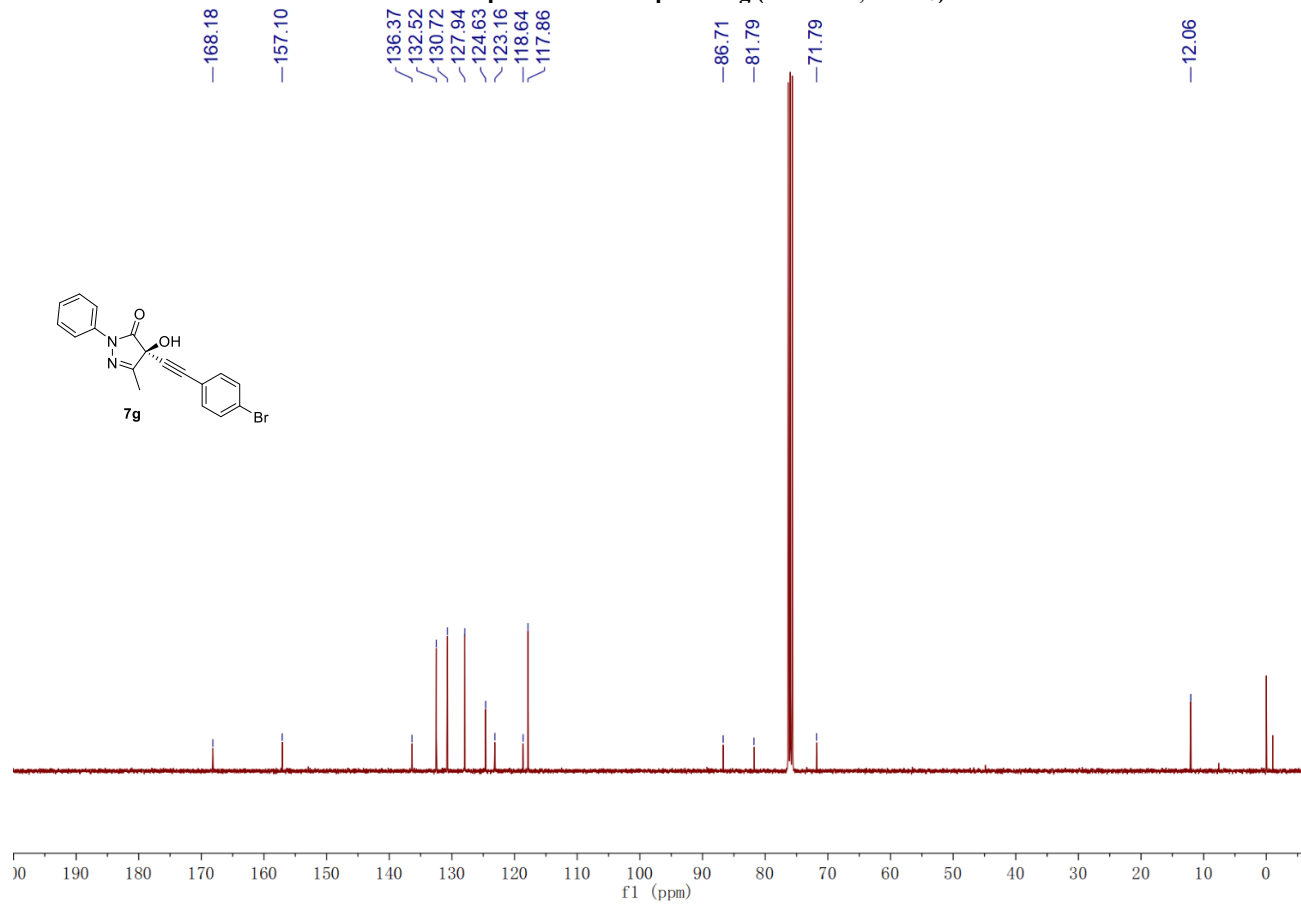

# SUPPORTING INFORMATION

**<sup>1</sup>H NMR Spectrum of Compound 7h (400 MHz, CDCl<sub>3</sub>)**

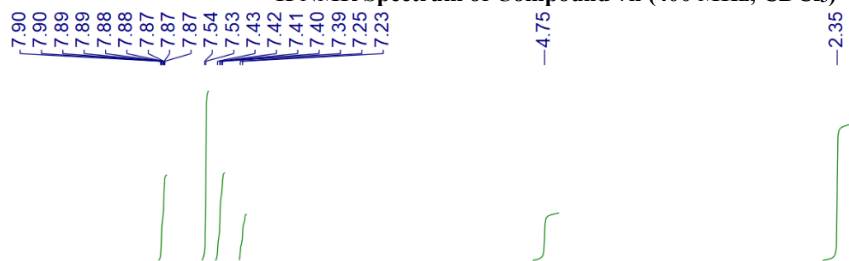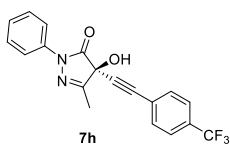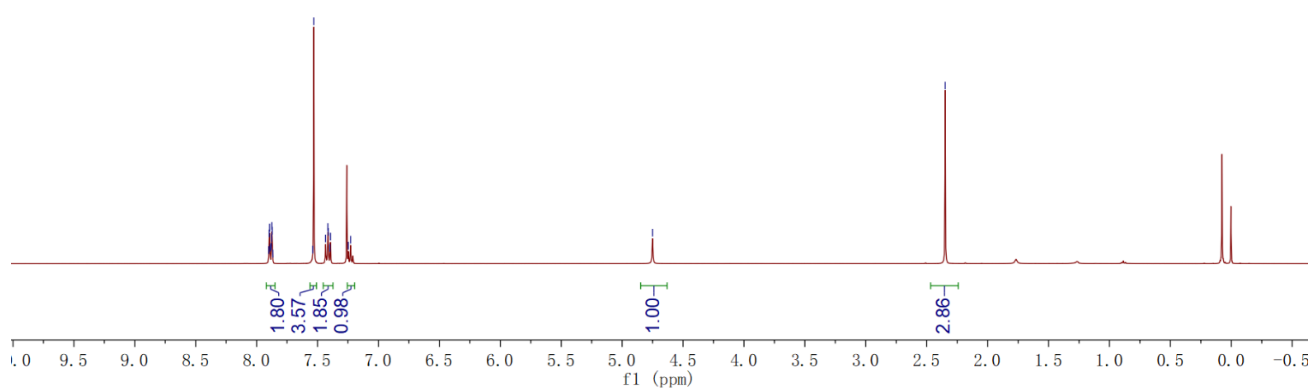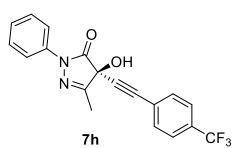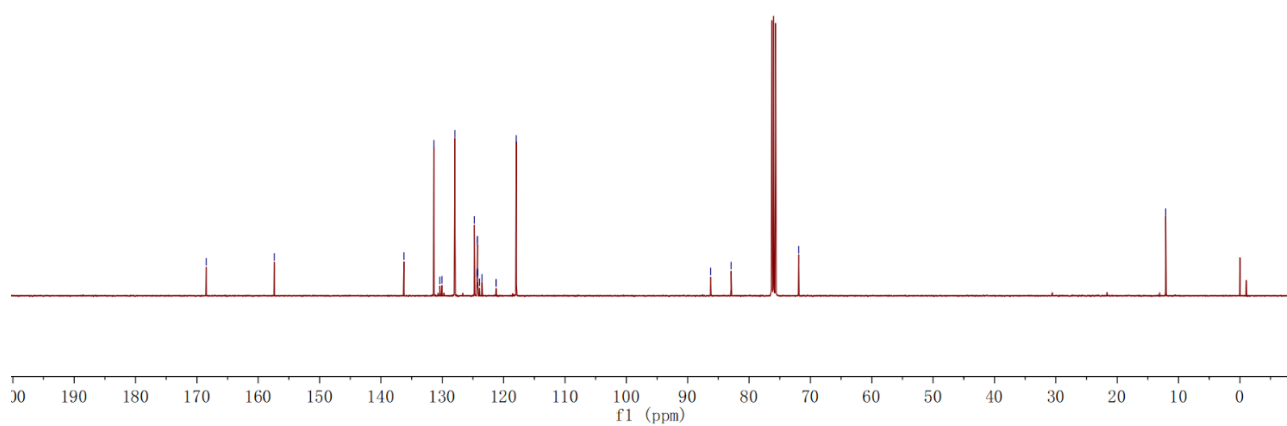

# SUPPORTING INFORMATION

## <sup>19</sup>F NMR Spectrum of Compound 7h (376 MHz, CDCl<sub>3</sub>)

---63.06

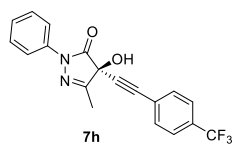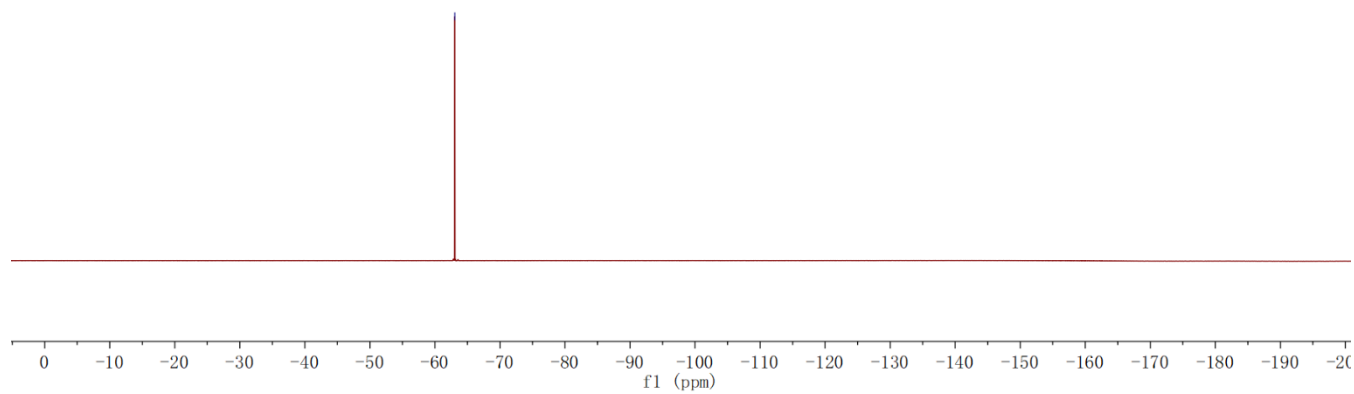

# SUPPORTING INFORMATION

**<sup>1</sup>H NMR Spectrum of Compound 7i (400 MHz, DMSO-d<sub>6</sub>)**

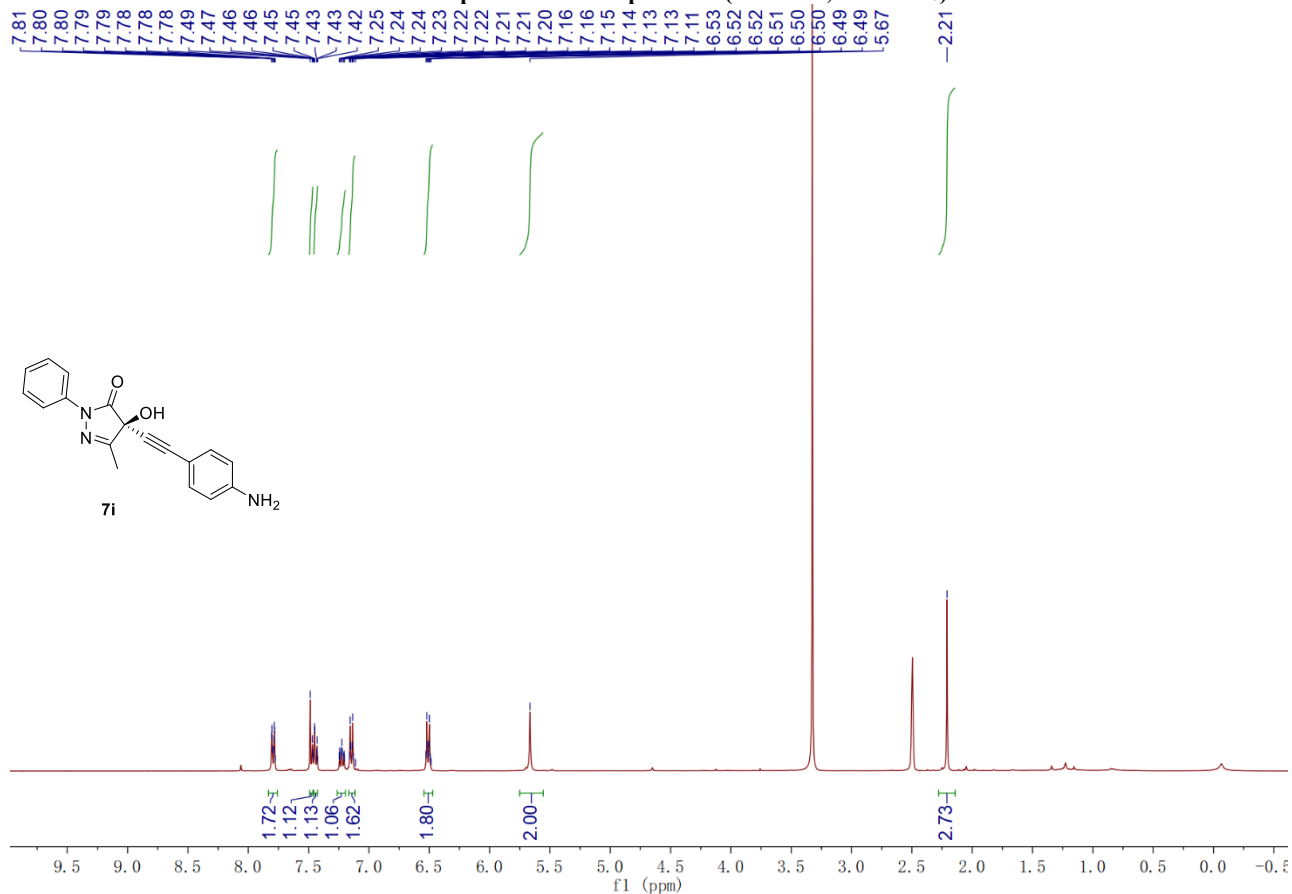

**<sup>13</sup>C NMR Spectrum of Compound 7i (150 MHz, DMSO-d<sub>6</sub>)**

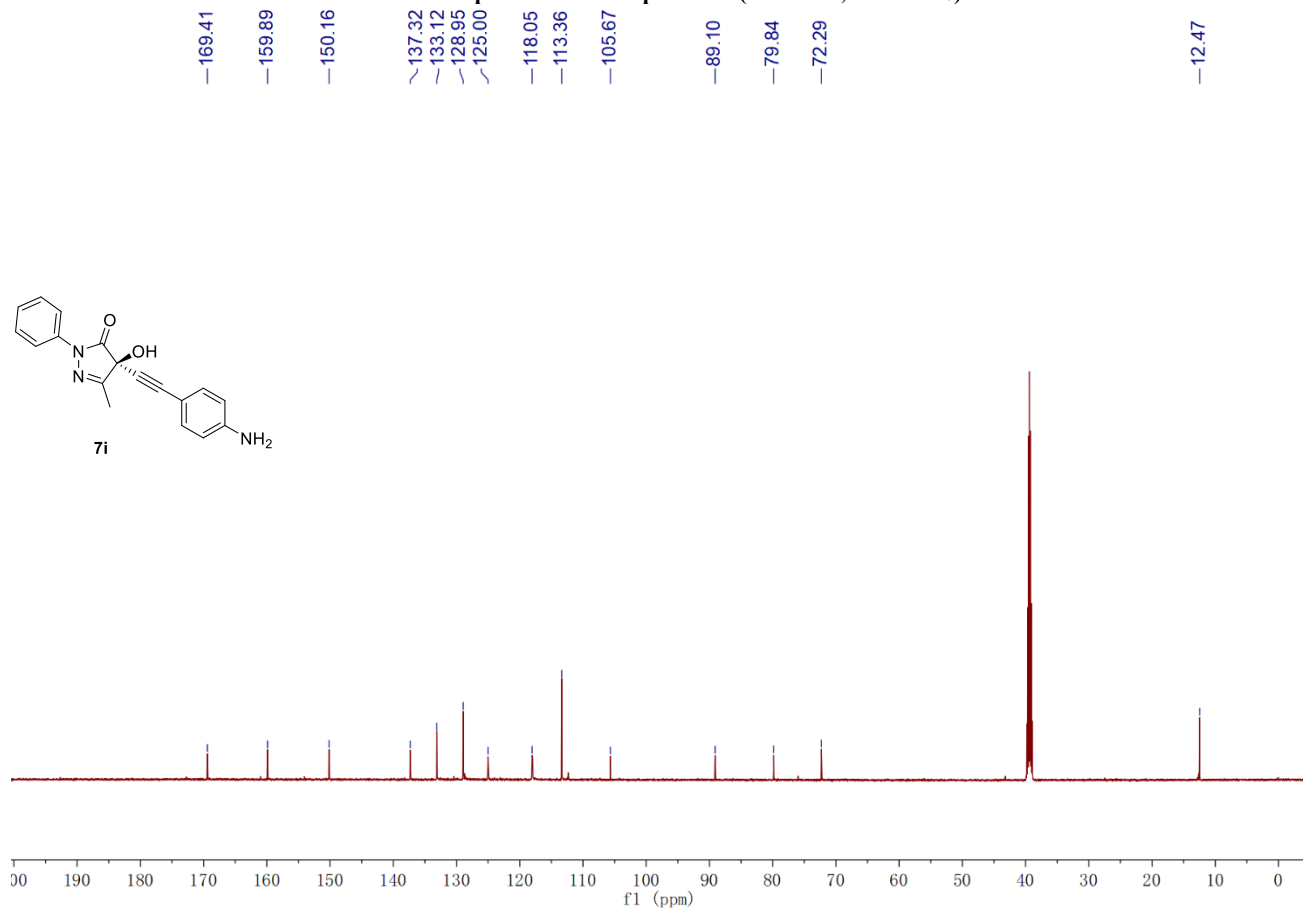



# SUPPORTING INFORMATION

**<sup>1</sup>H NMR Spectrum of Compound 7j (400 MHz, CDCl<sub>3</sub>)**

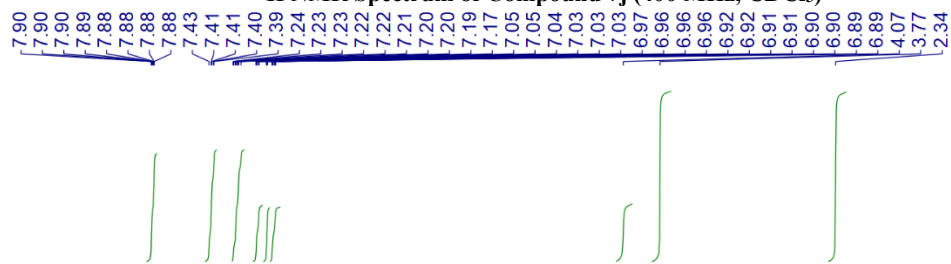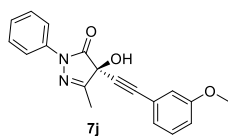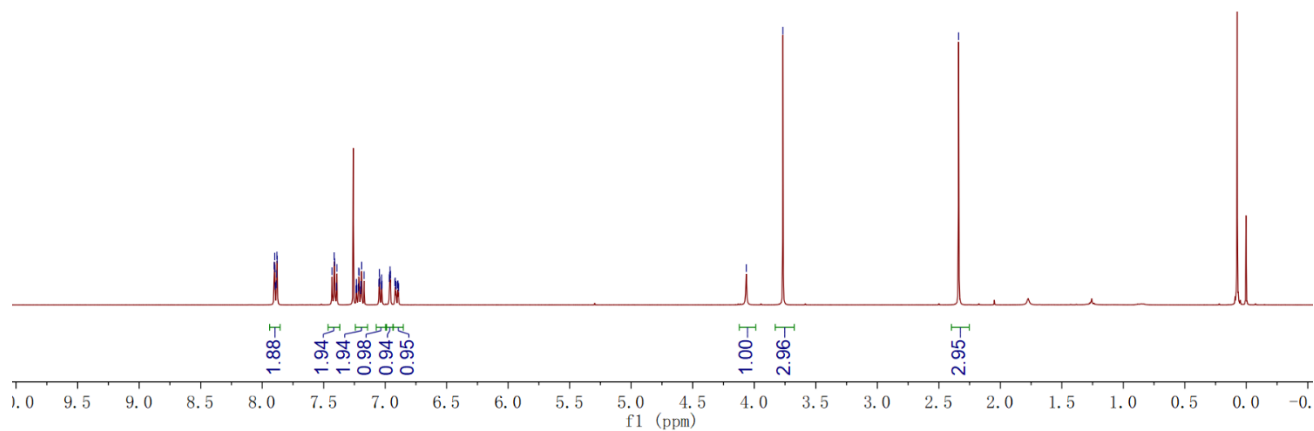

**<sup>13</sup>C NMR Spectrum of Compound 7j (100 MHz, CDCl<sub>3</sub>)**

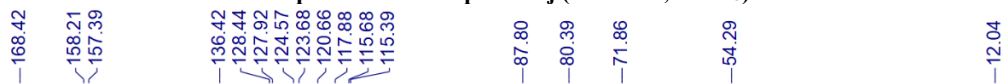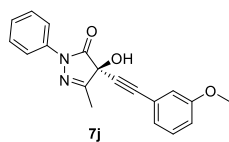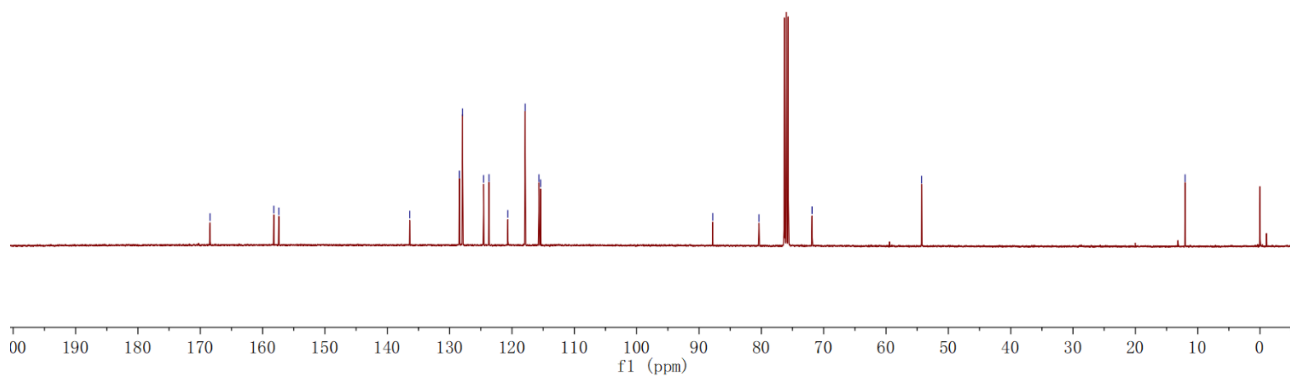

# SUPPORTING INFORMATION

<sup>1</sup>H NMR Spectrum of Compound 7k (400 MHz, CDCl<sub>3</sub>)

7.81, 7.81, 7.81, 7.79, 7.79, 7.34, 7.33, 7.32, 7.32, 7.30, 7.30, 7.17, 7.16, 7.14, 7.14, 7.14, 7.12, 7.11, 7.10, 7.10, 7.07, 7.07, 7.06, 7.05, 4.54, 2.25, 2.19

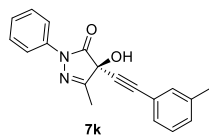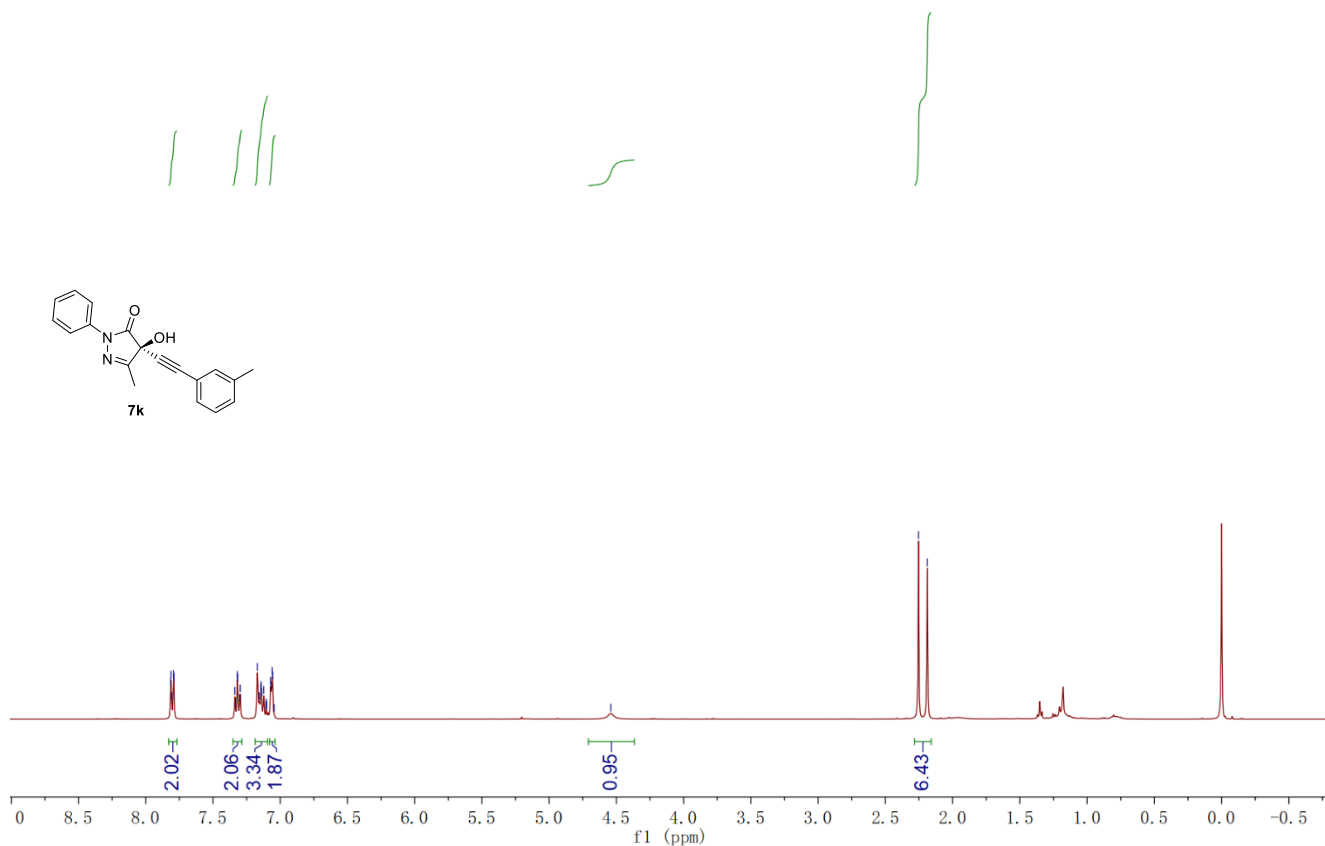

<sup>13</sup>C NMR Spectrum of Compound 7k (100 MHz, CDCl<sub>3</sub>)

168.69, 157.69, 137.06, 136.47, 131.71, 129.38, 128.25, 127.88, 127.20, 124.53, 119.60, 117.95, 88.09, 80.36, 71.98, 20.07, 11.97

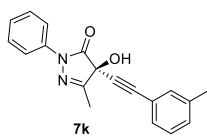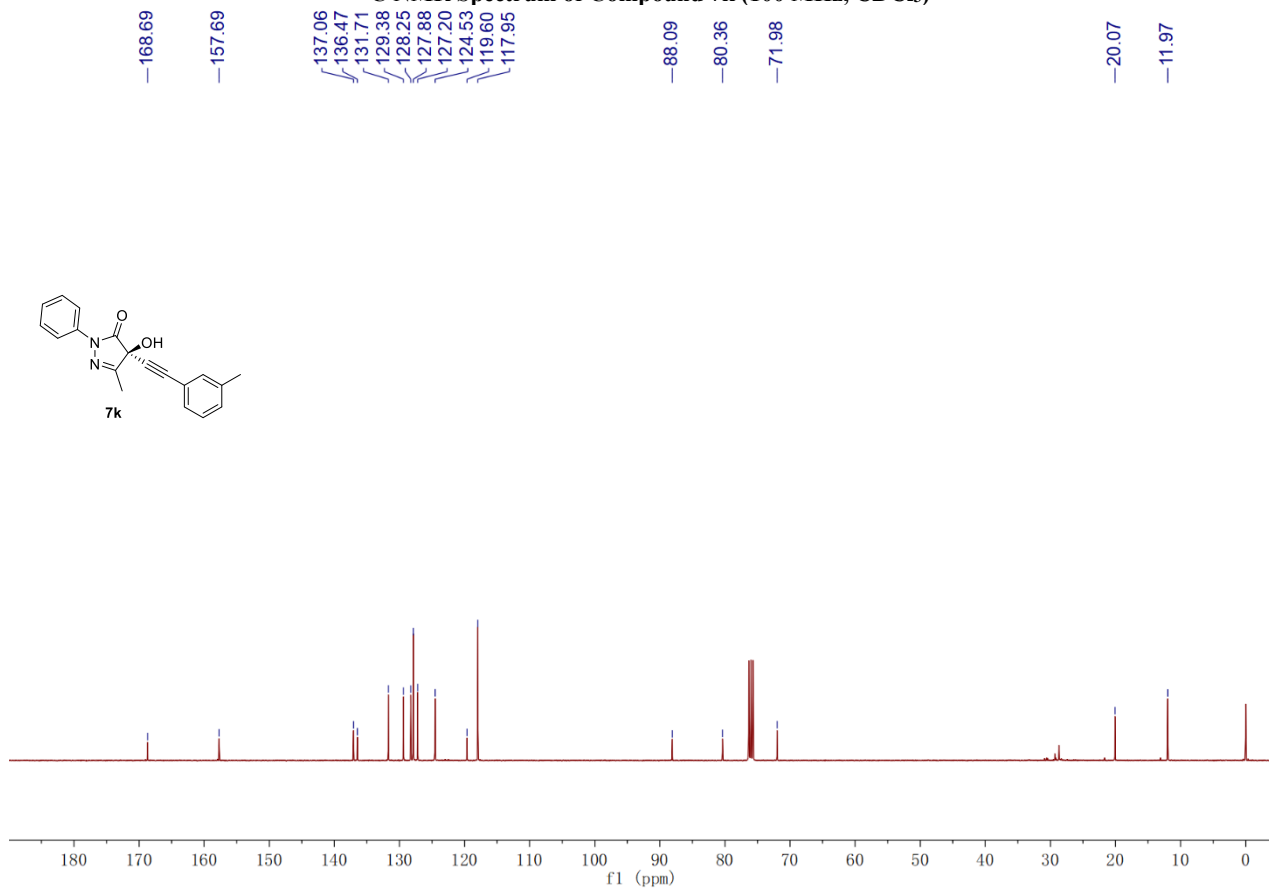

# SUPPORTING INFORMATION

<sup>1</sup>H NMR Spectrum of Compound 71 (400 MHz, DMSO-d<sub>6</sub>)

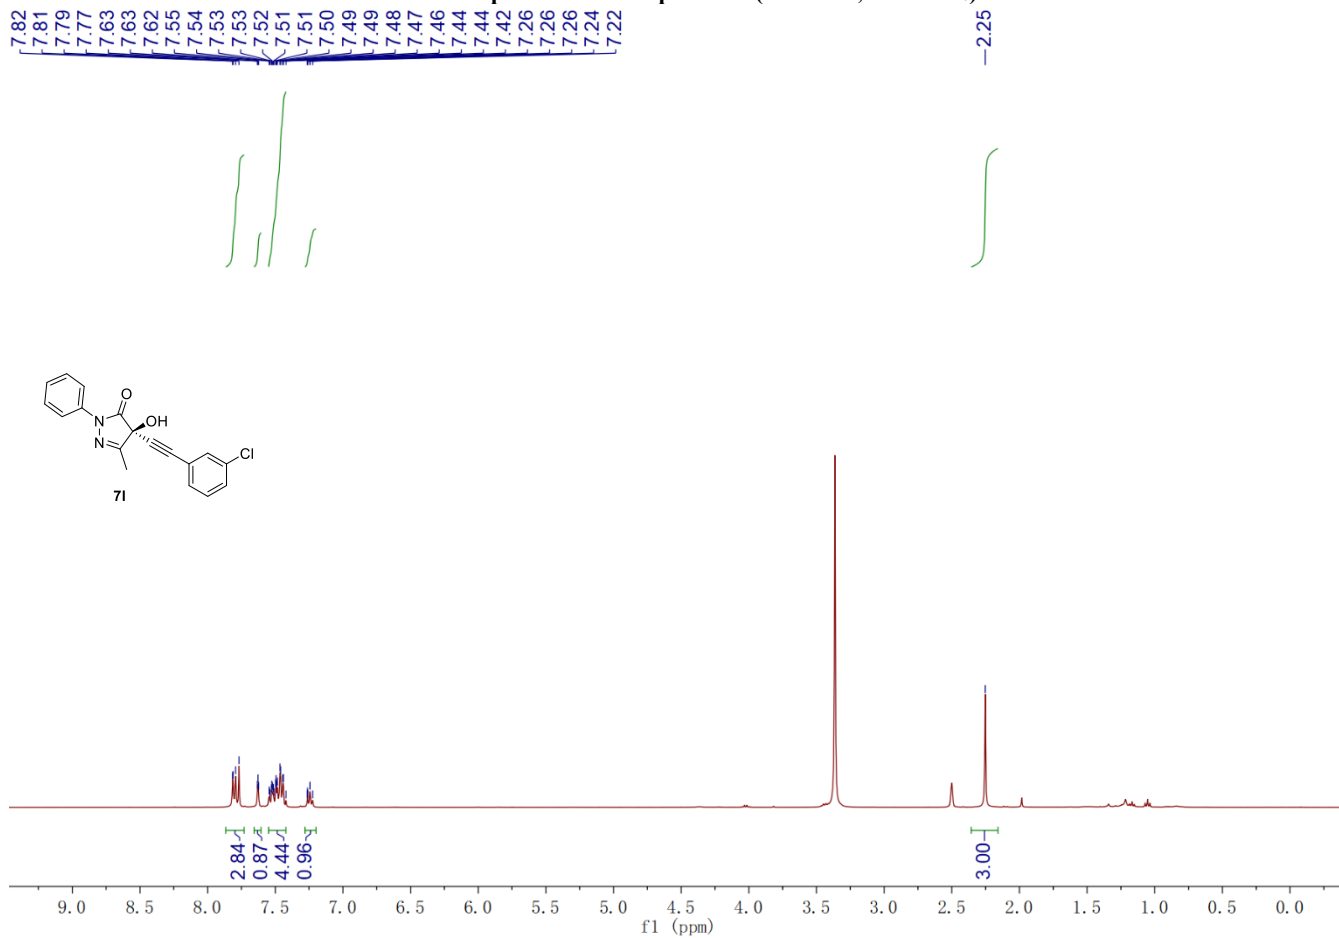

<sup>13</sup>C NMR Spectrum of Compound 71 (100 MHz, DMSO-d<sub>6</sub>)

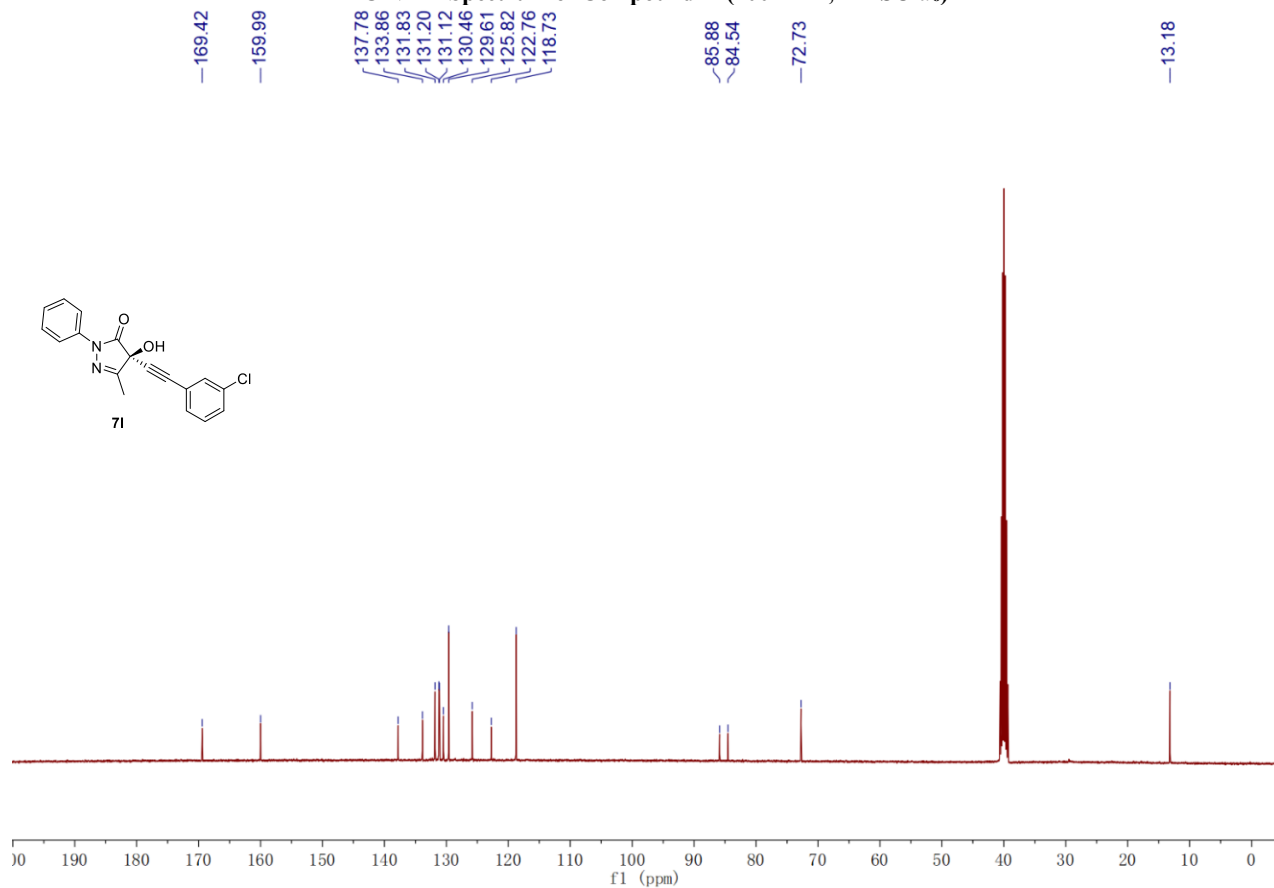

# SUPPORTING INFORMATION

**<sup>1</sup>H NMR Spectrum of Compound 7m (400 MHz, DMSO-*d*<sub>6</sub>)**

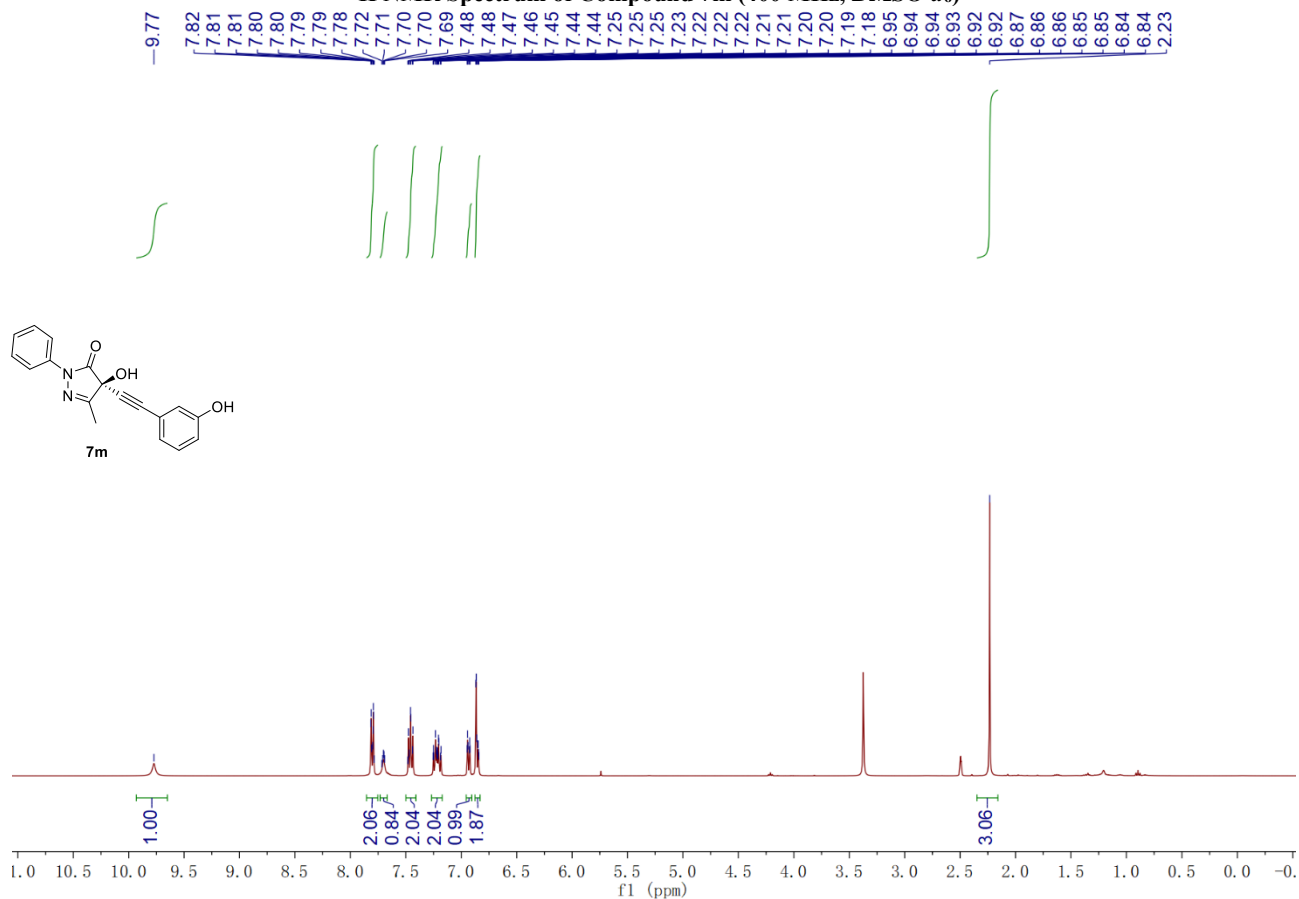

**<sup>13</sup>C NMR Spectrum of Compound 7m (150 MHz, DMSO-*d*<sub>6</sub>)**

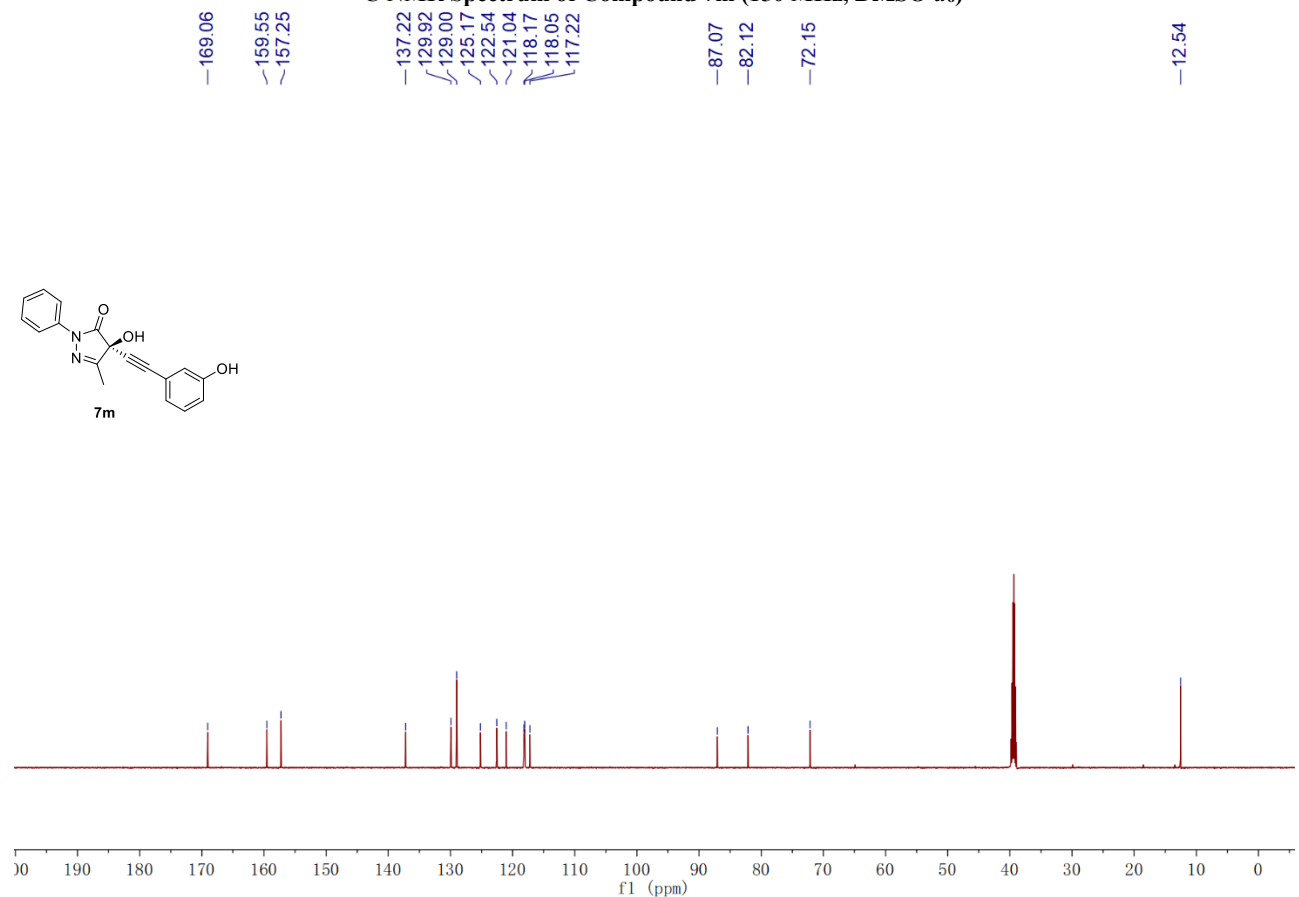

# SUPPORTING INFORMATION

**<sup>1</sup>H NMR Spectrum of Compound 7n (400 MHz, DMSO-*d*<sub>6</sub>)**

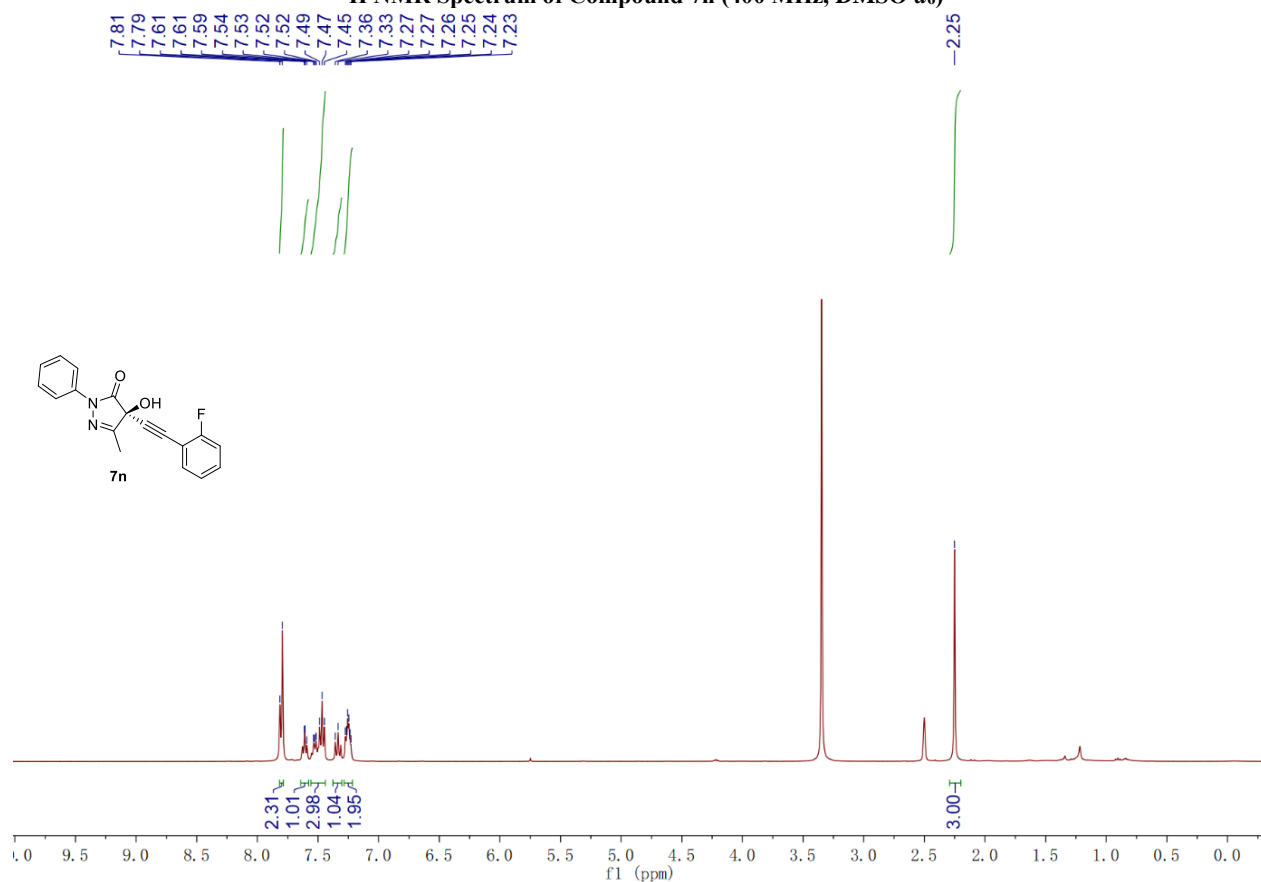

**<sup>13</sup>C NMR Spectrum of Compound 7n (100 MHz, DMSO-*d*<sub>6</sub>)**

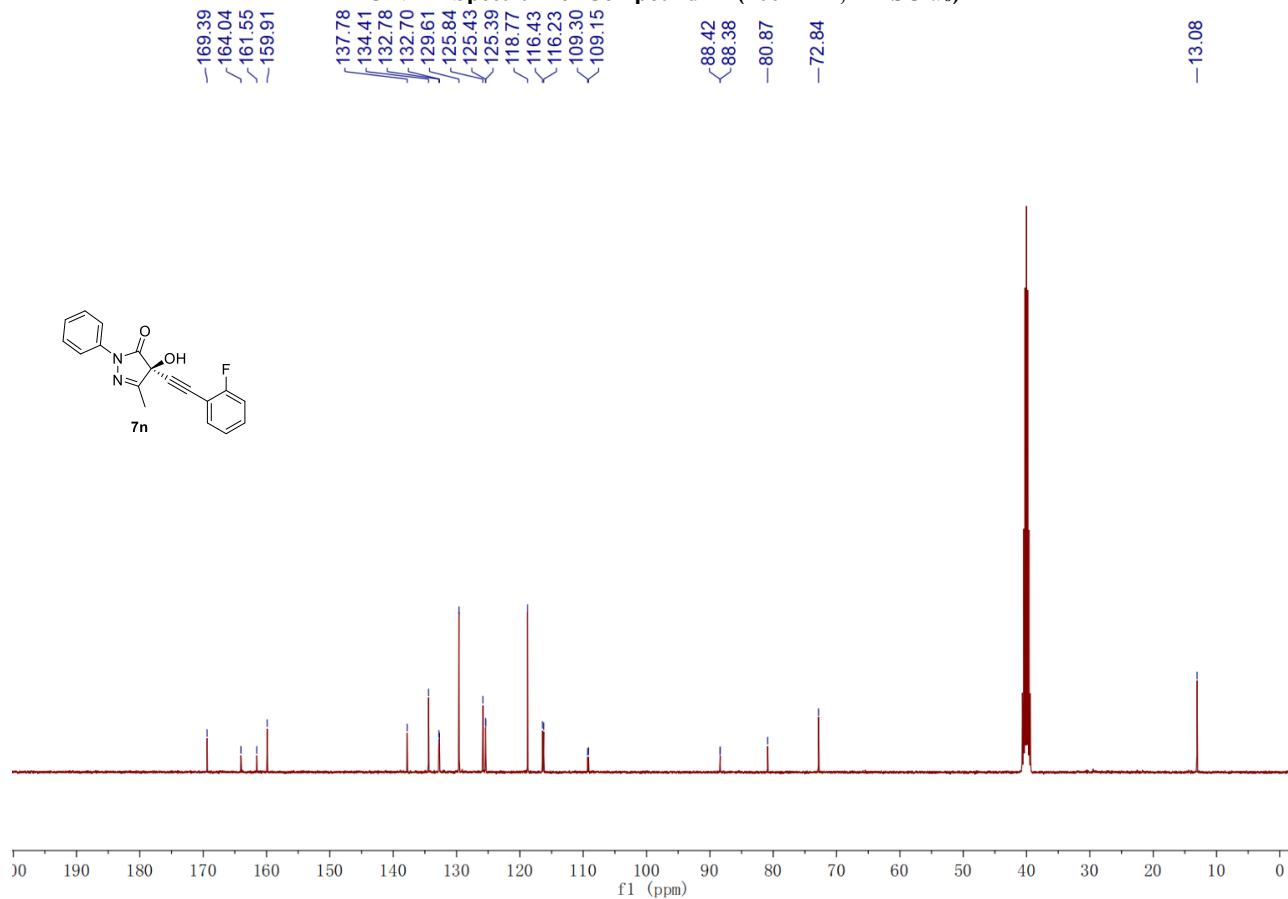

# SUPPORTING INFORMATION

## <sup>19</sup>F NMR Spectrum of Compound 7n (376 MHz, CDCl<sub>3</sub>)

--108.67

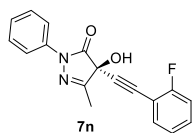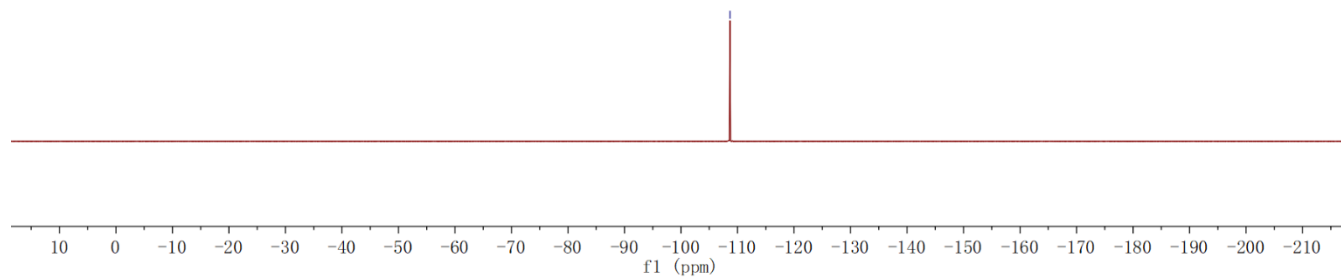

# SUPPORTING INFORMATION

**<sup>1</sup>H NMR Spectrum of Compound 7o (400 MHz, CDCl<sub>3</sub>)**

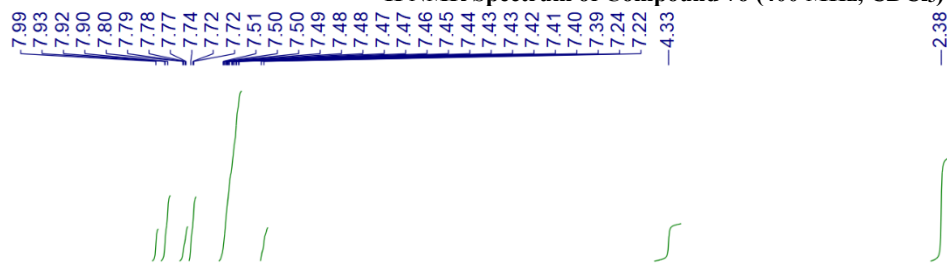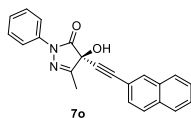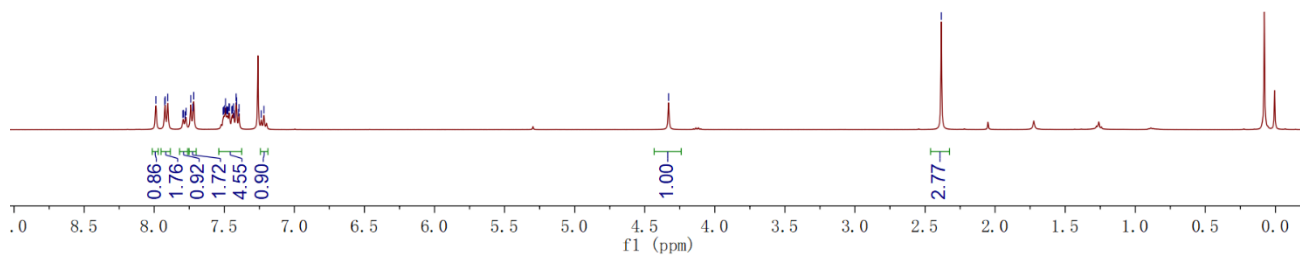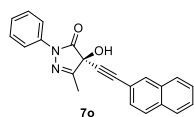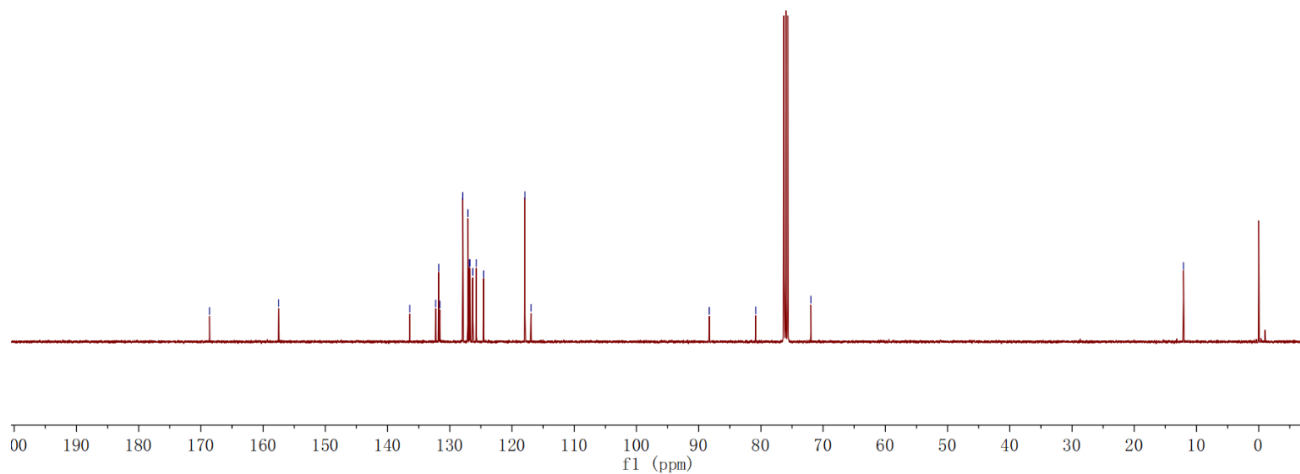

# SUPPORTING INFORMATION

**<sup>1</sup>H NMR Spectrum of Compound 7p (400 MHz, CDCl<sub>3</sub>)**

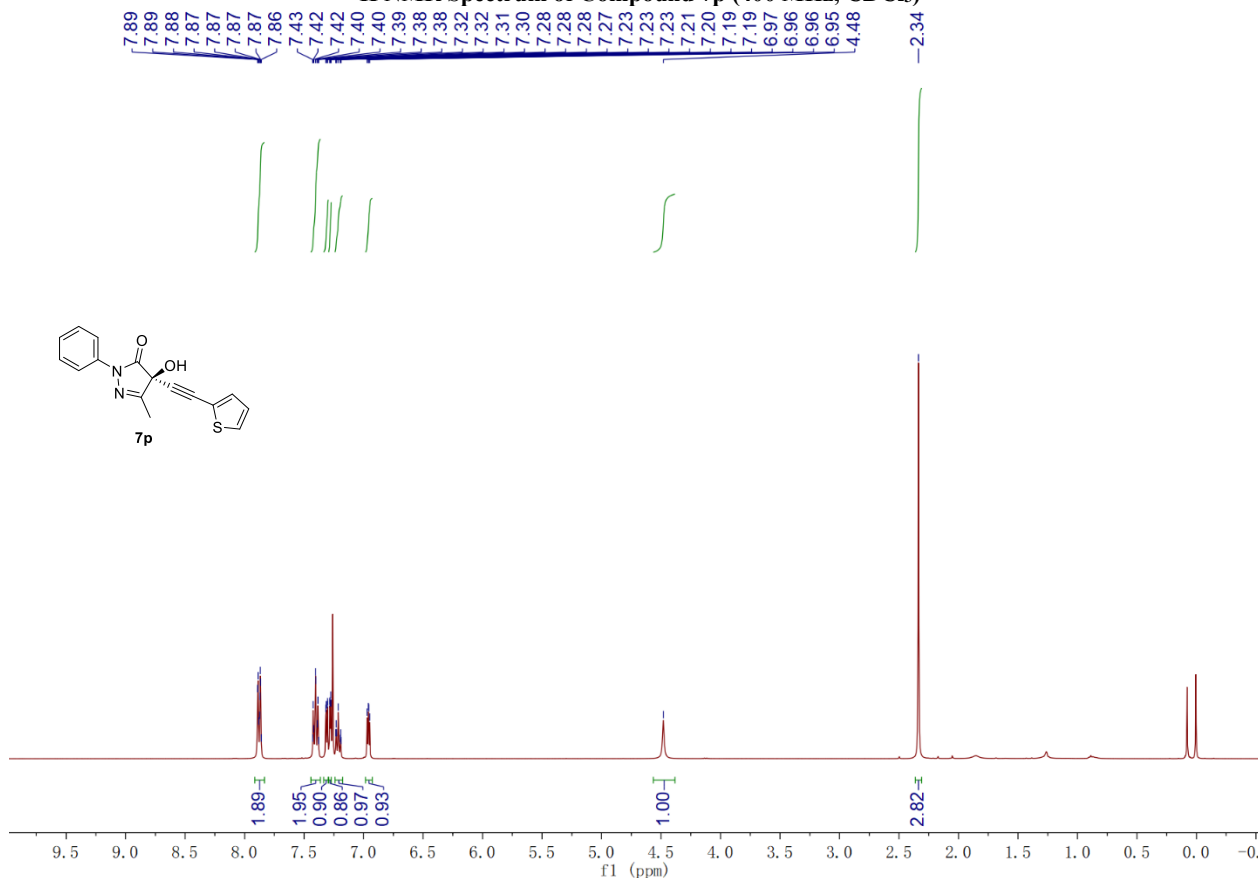

**<sup>13</sup>C NMR Spectrum of Compound 7p (100 MHz, CDCl<sub>3</sub>)**

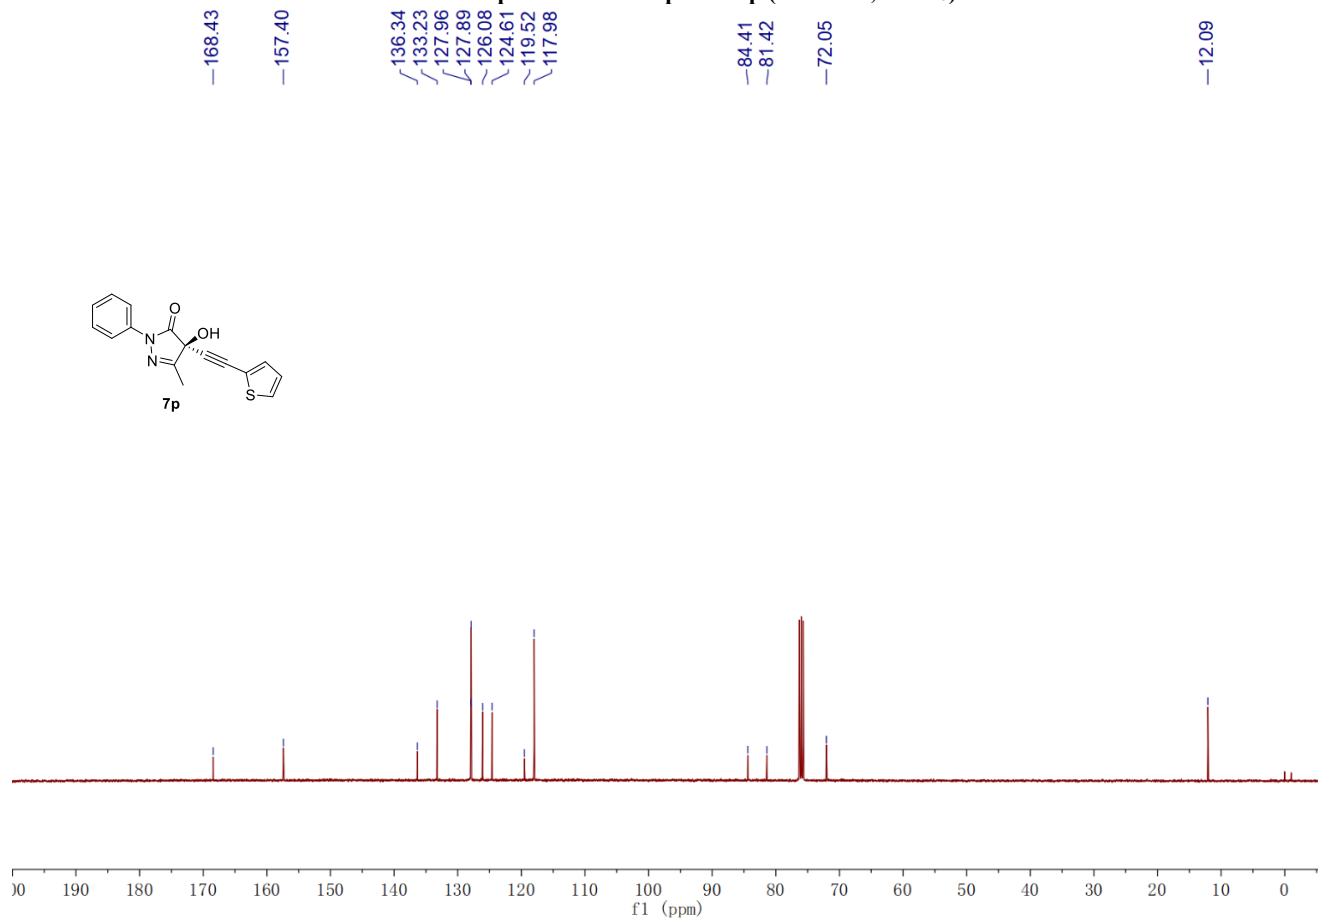



# SUPPORTING INFORMATION

<sup>1</sup>H NMR Spectrum of Compound 7q (400 MHz, CDCl<sub>3</sub>)

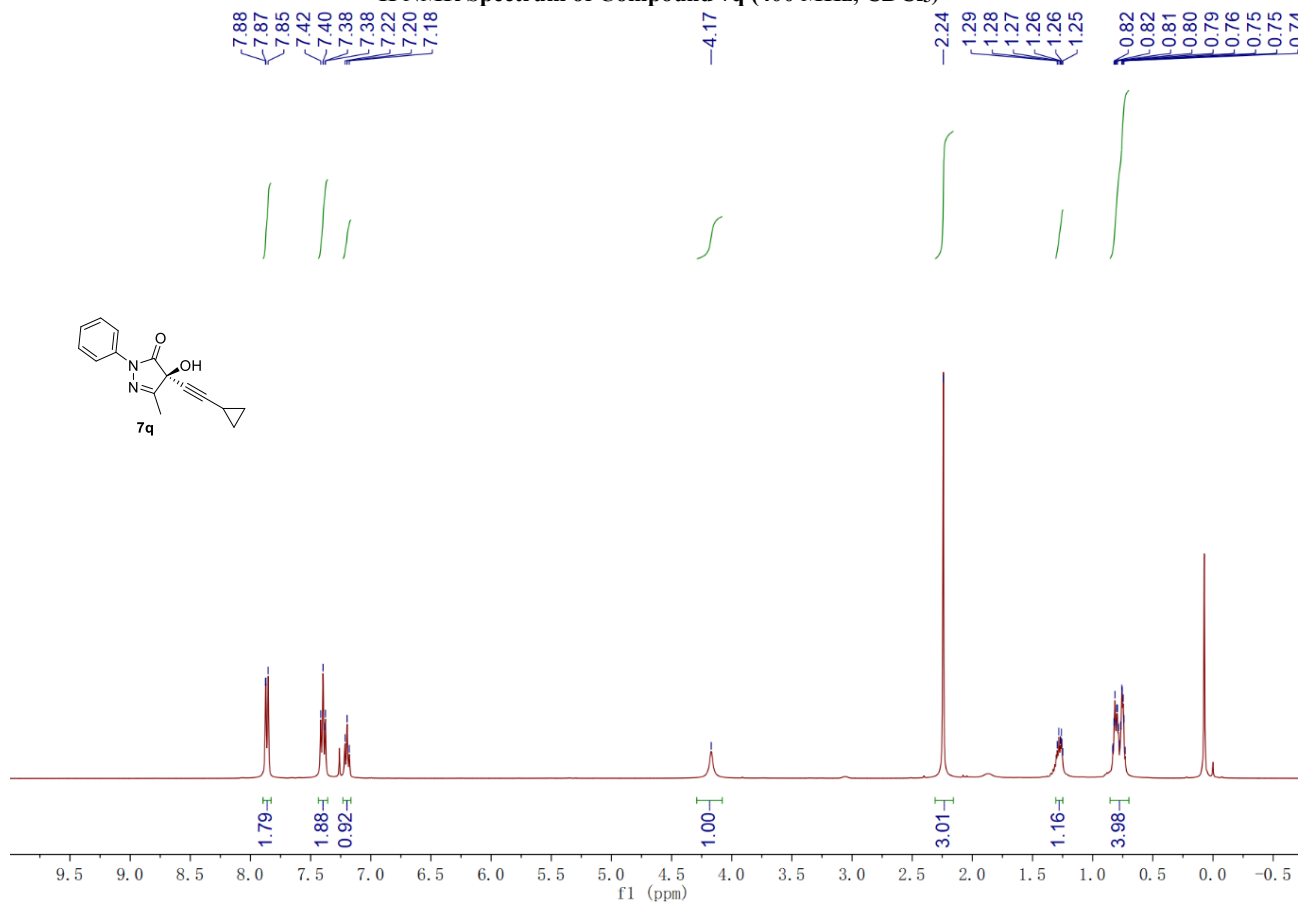

<sup>13</sup>C NMR Spectrum of Compound 7q (100 MHz, CDCl<sub>3</sub>)

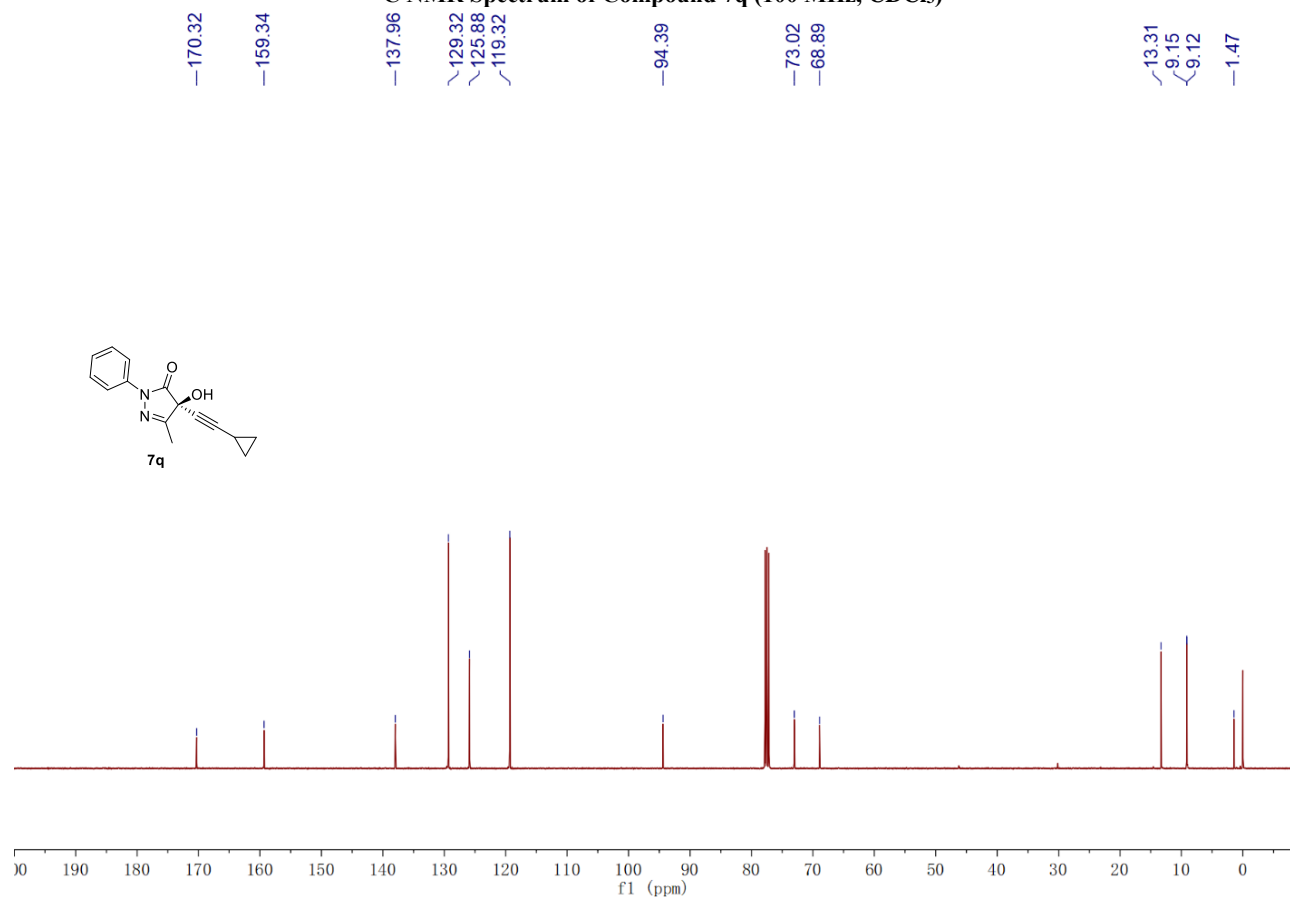

# SUPPORTING INFORMATION

**<sup>1</sup>H NMR Spectrum of Compound 7r (400 MHz, CDCl<sub>3</sub>)**

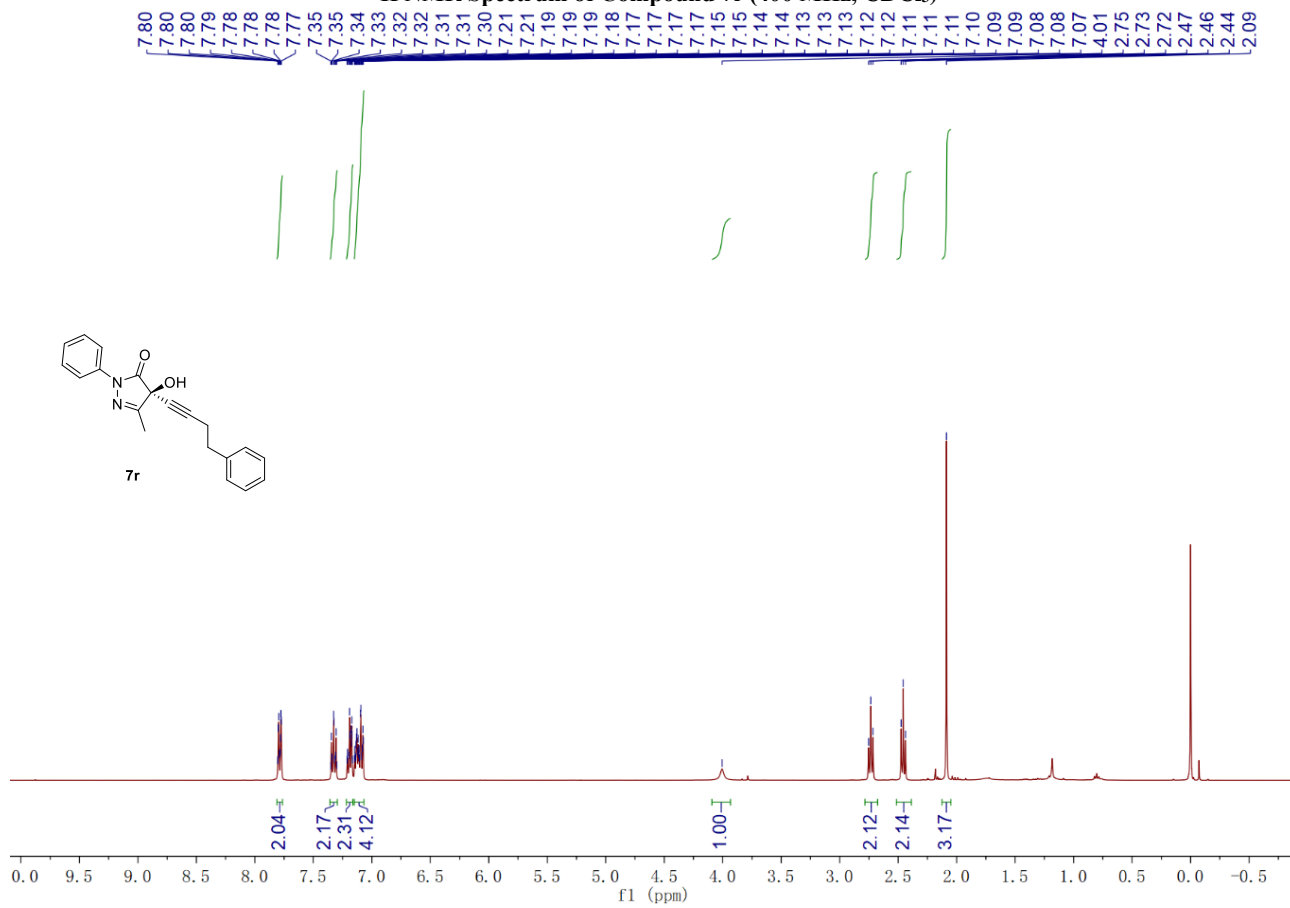

**<sup>13</sup>C NMR Spectrum of Compound 7r (100 MHz, CDCl<sub>3</sub>)**

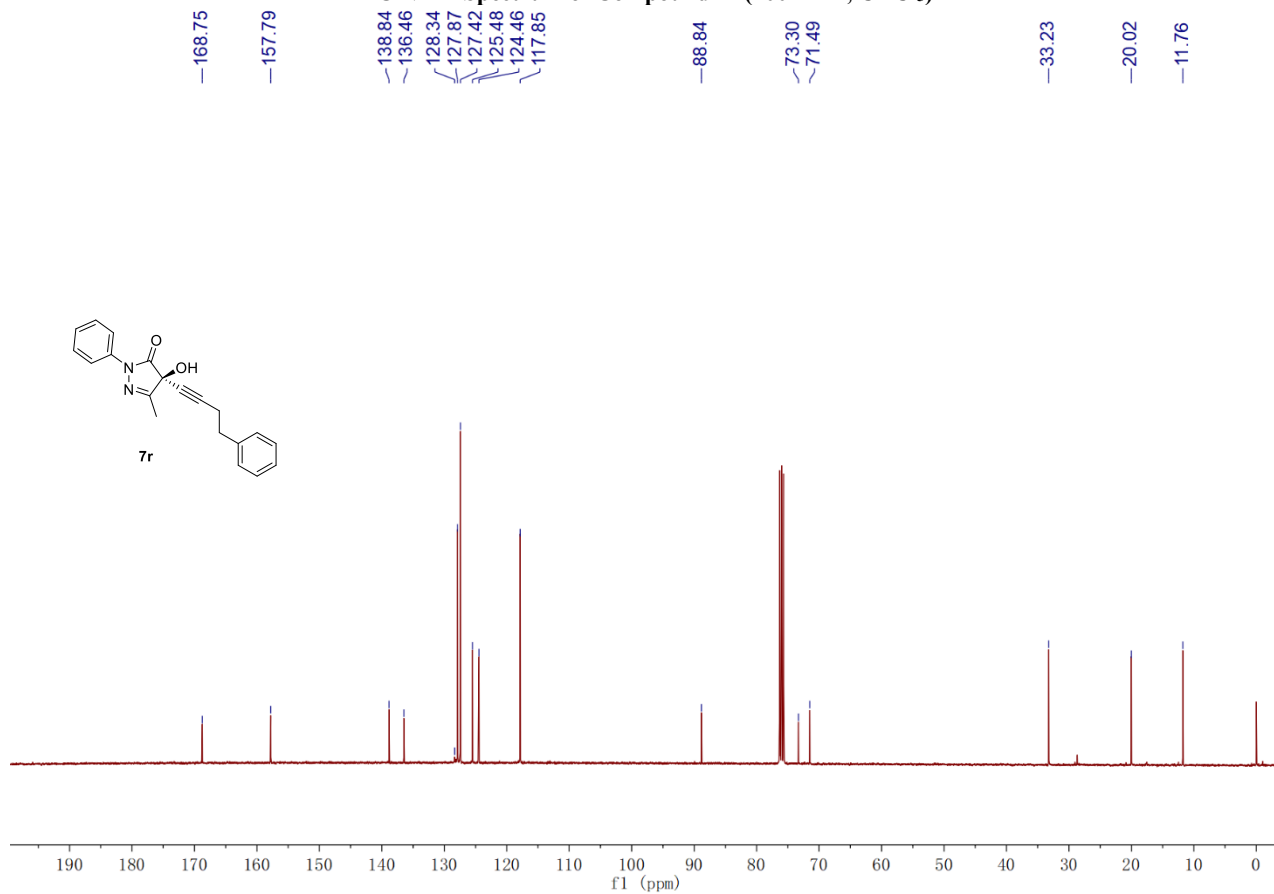

# SUPPORTING INFORMATION

**<sup>1</sup>H NMR Spectrum of Compound 7s (400 MHz, CDCl<sub>3</sub>)**

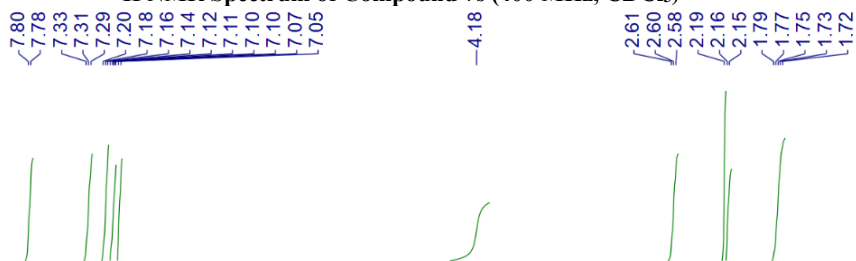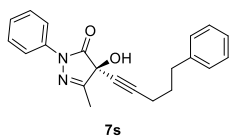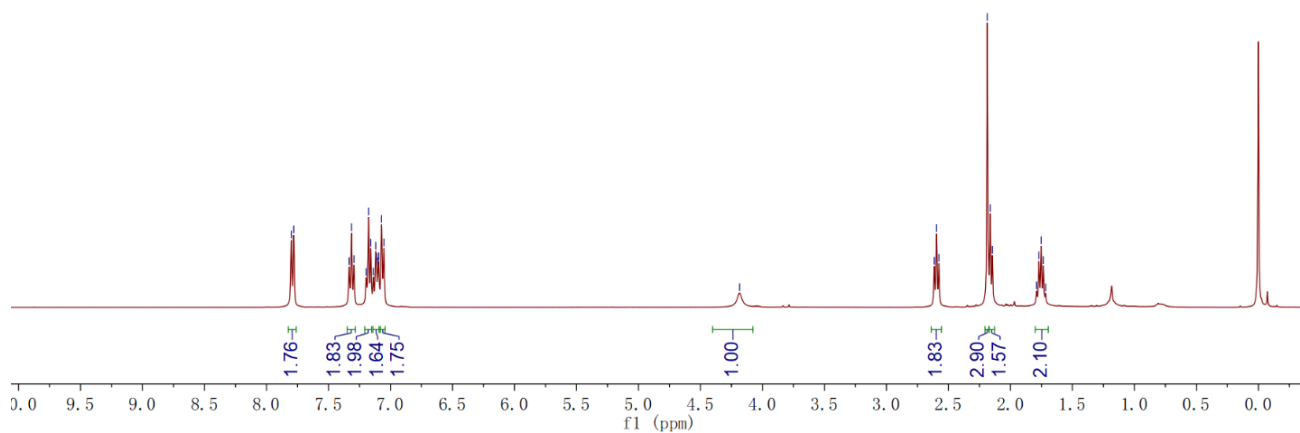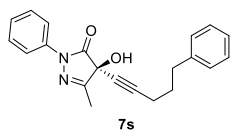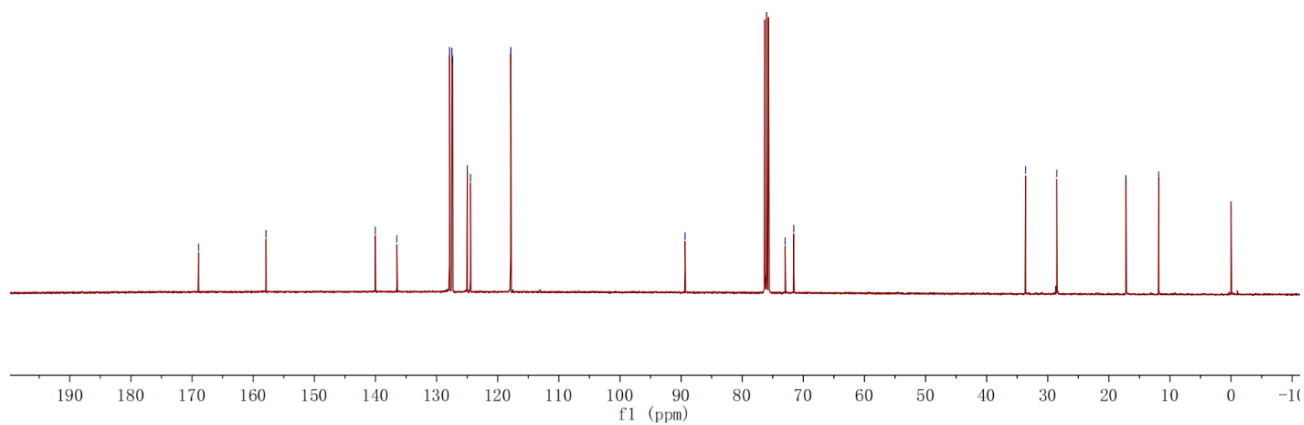

# SUPPORTING INFORMATION

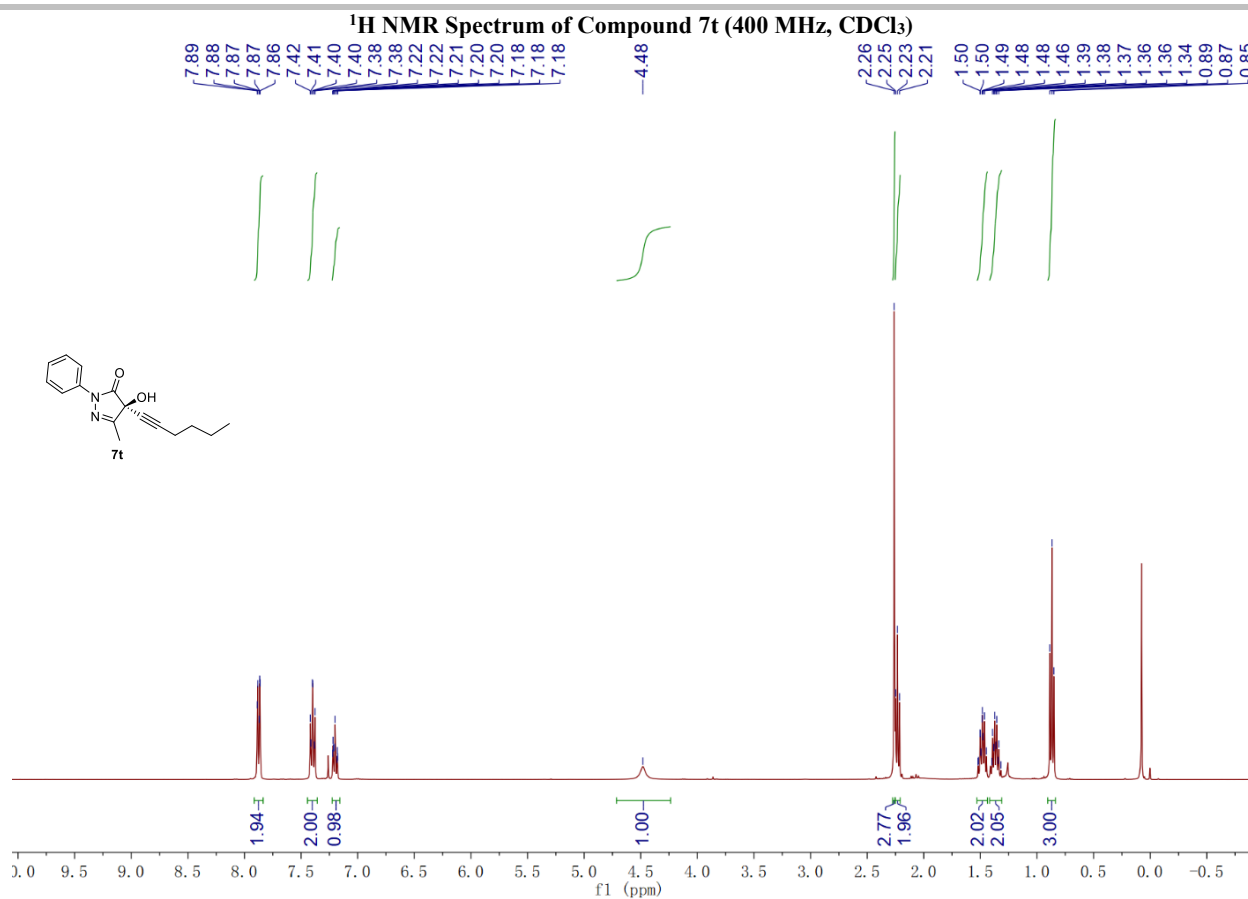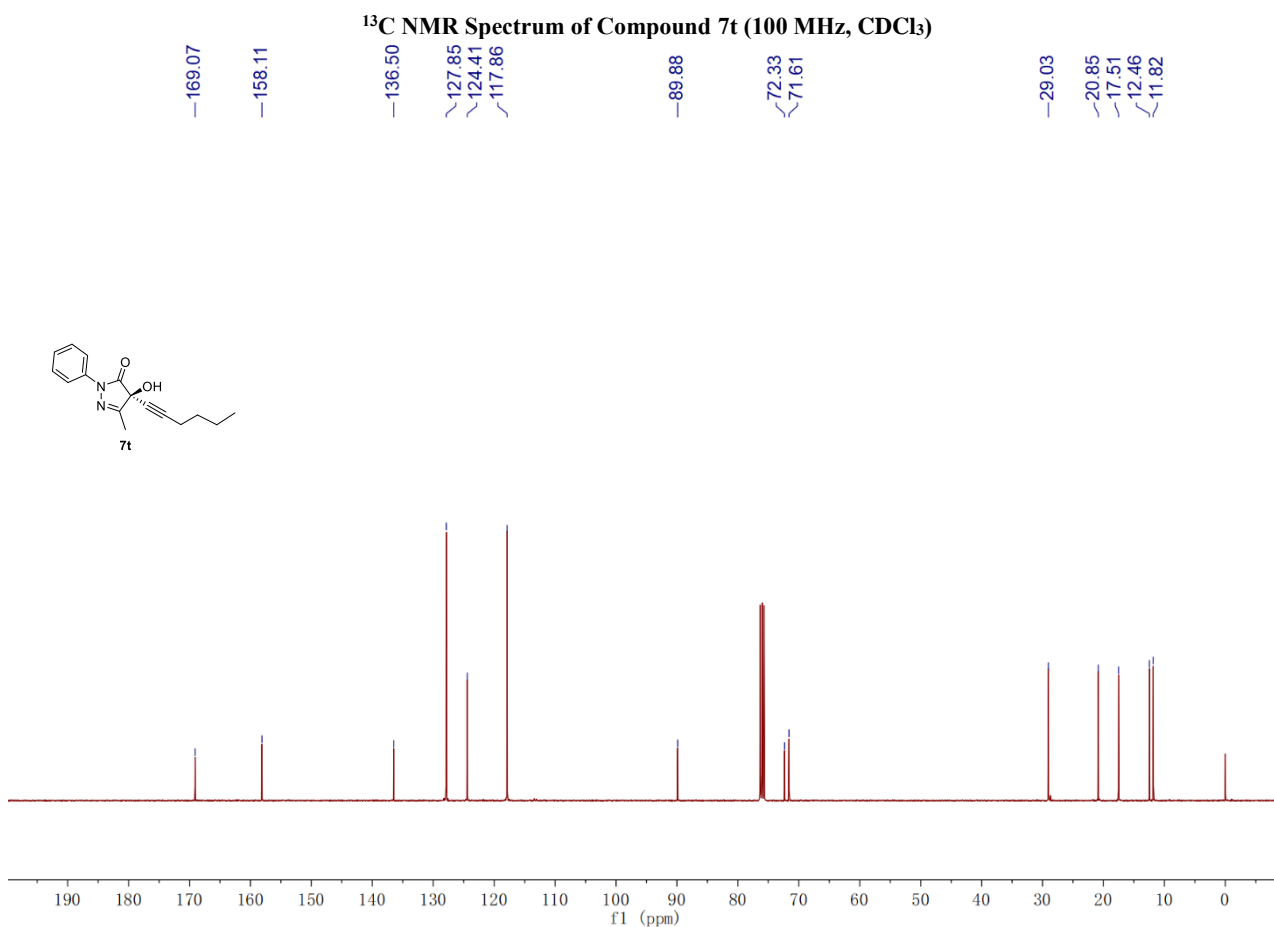

# SUPPORTING INFORMATION

**<sup>1</sup>H NMR Spectrum of Compound 8a (400 MHz, CDCl<sub>3</sub>)**

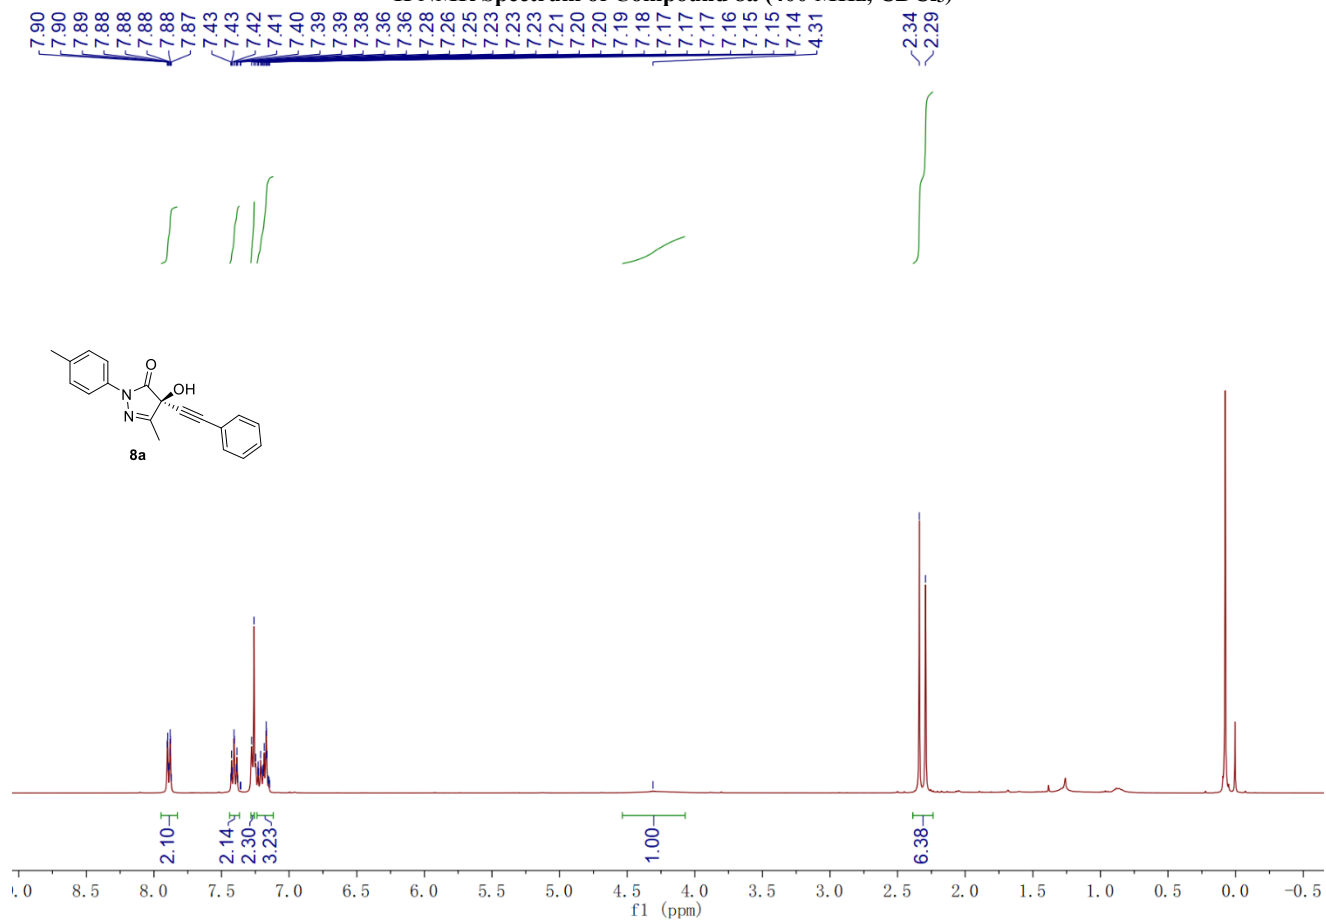

**<sup>13</sup>C NMR Spectrum of Compound 8a (100 MHz, CDCl<sub>3</sub>)**

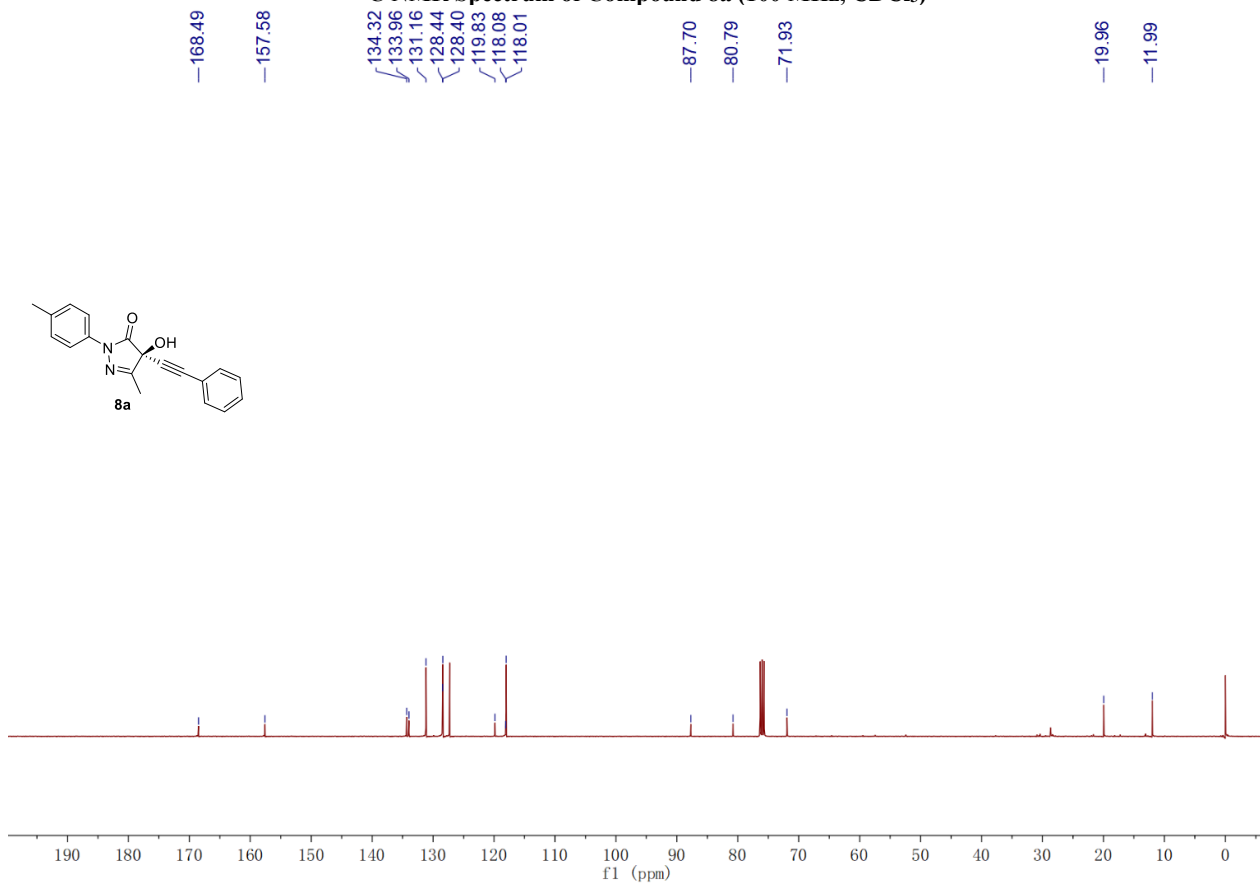

# SUPPORTING INFORMATION

<sup>1</sup>H NMR Spectrum of Compound 8b (400 MHz, CDCl<sub>3</sub>)

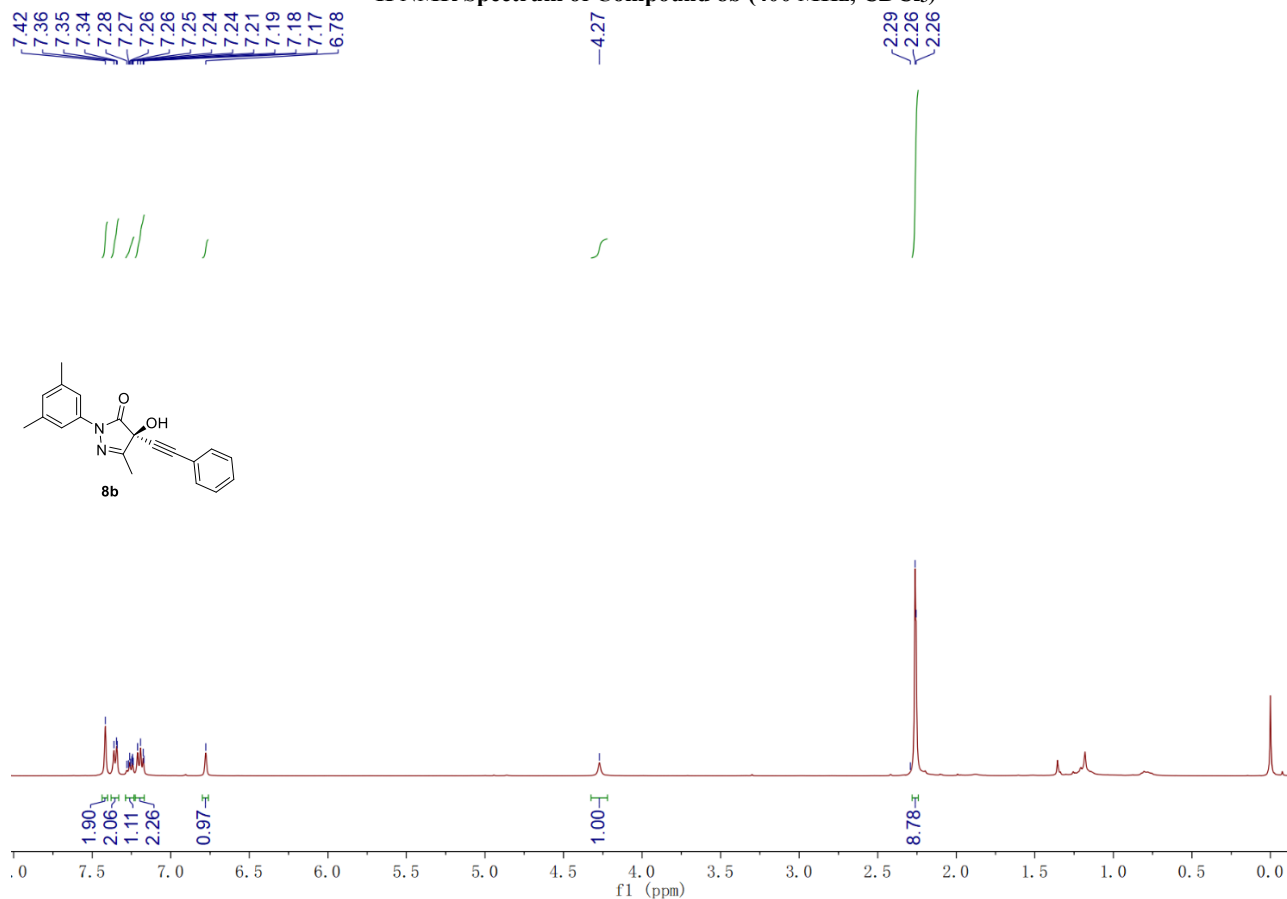

<sup>13</sup>C NMR Spectrum of Compound 8b (100 MHz, CDCl<sub>3</sub>)

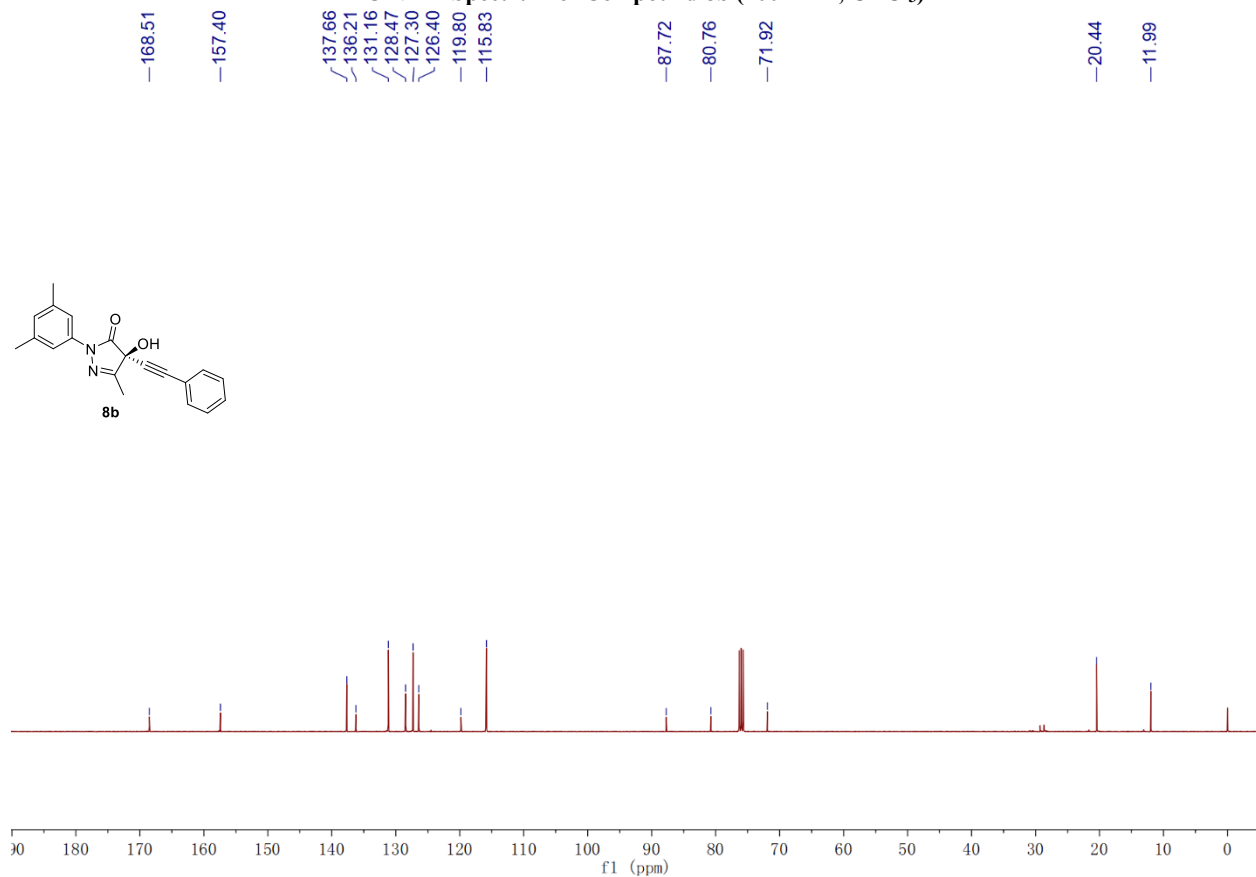

# SUPPORTING INFORMATION

**<sup>1</sup>H NMR Spectrum of Compound 8c (400 MHz, CDCl<sub>3</sub>)**

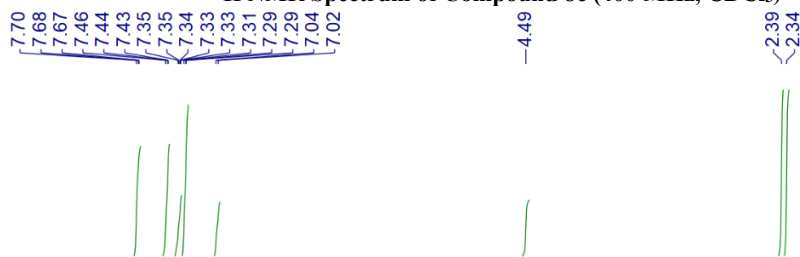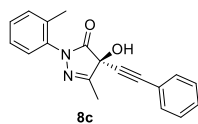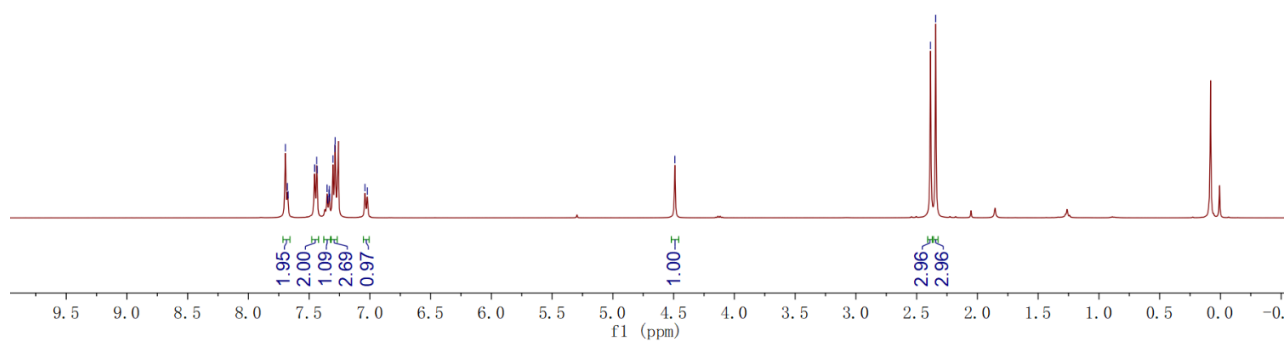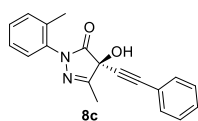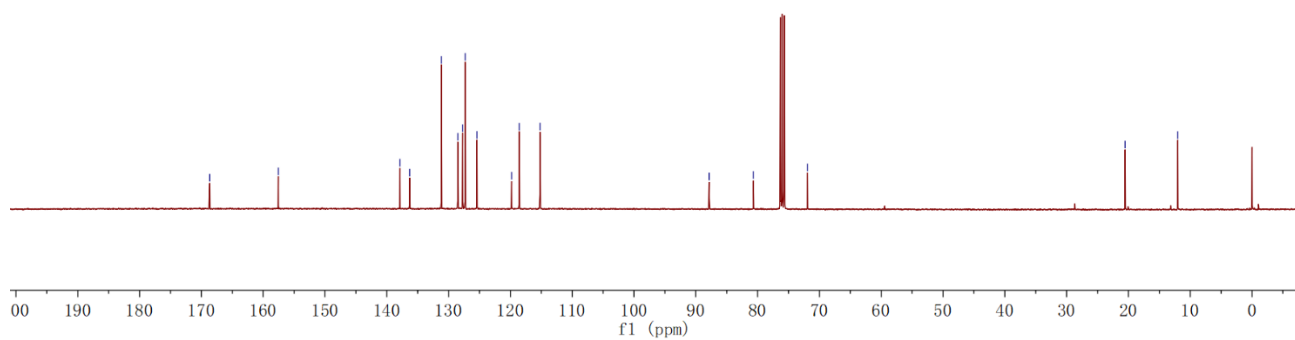

# SUPPORTING INFORMATION

**<sup>1</sup>H NMR Spectrum of Compound 8d (600 MHz, CDCl<sub>3</sub>)**

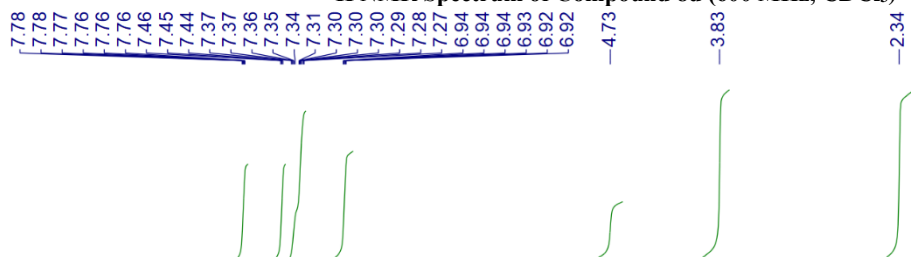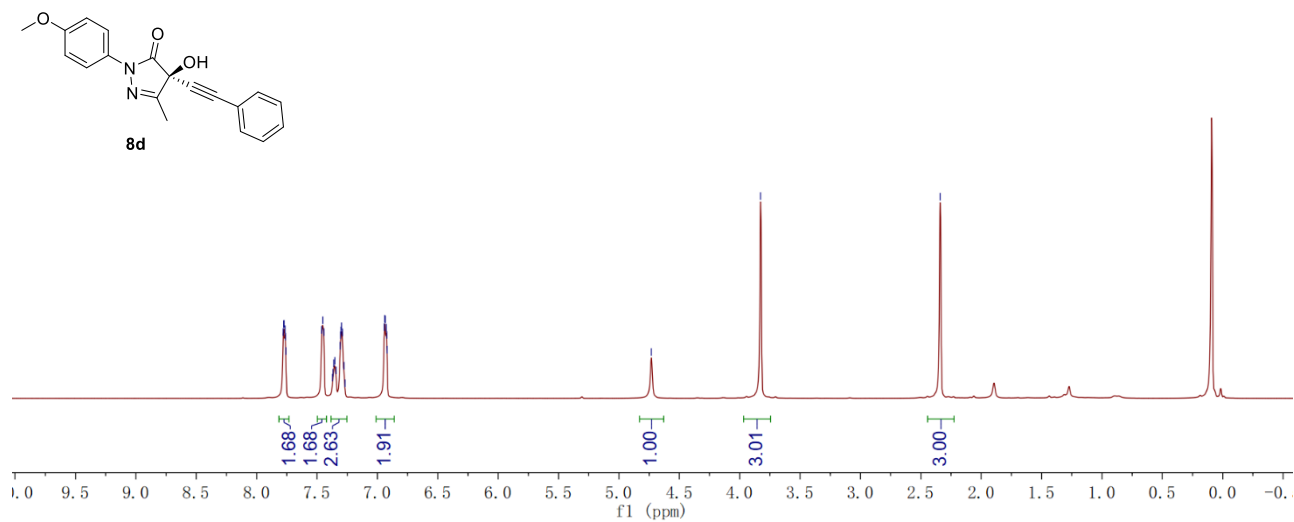

**<sup>13</sup>C NMR Spectrum of Compound 8d (150 MHz, CDCl<sub>3</sub>)**

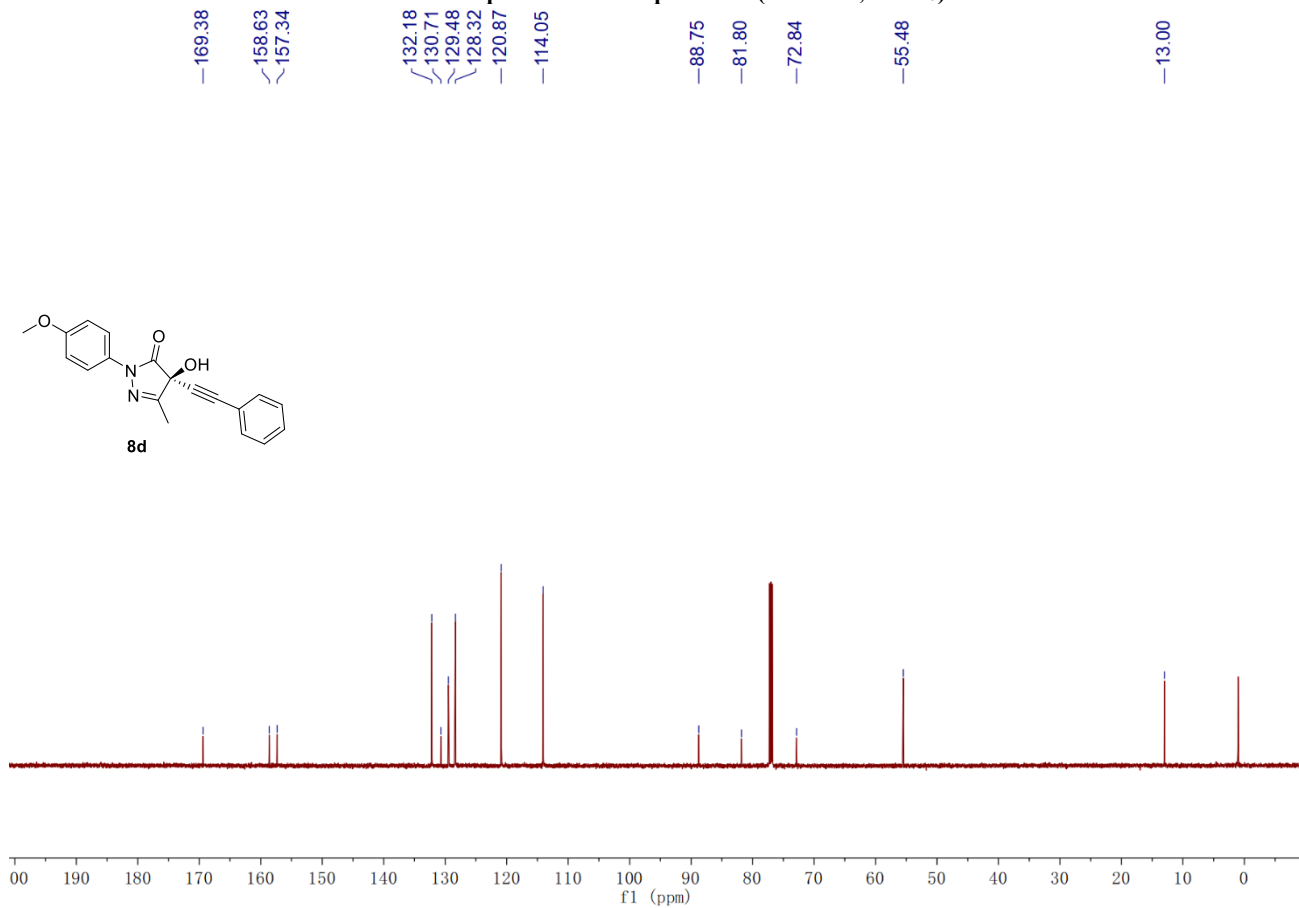



# SUPPORTING INFORMATION

**<sup>1</sup>H NMR Spectrum of Compound 8e (400 MHz, CDCl<sub>3</sub>)**

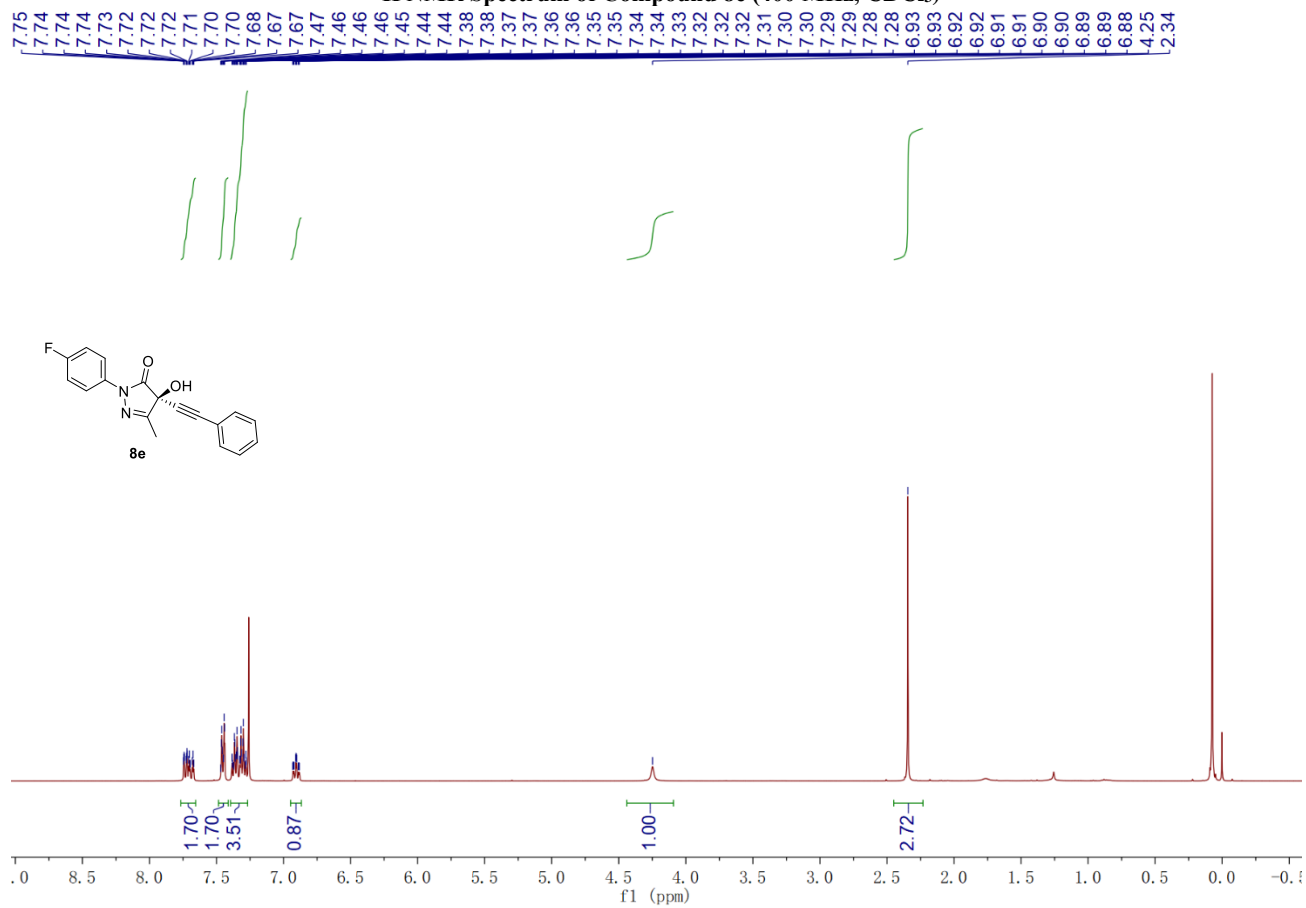

**<sup>13</sup>C NMR Spectrum of Compound 8e (100 MHz, CDCl<sub>3</sub>)**

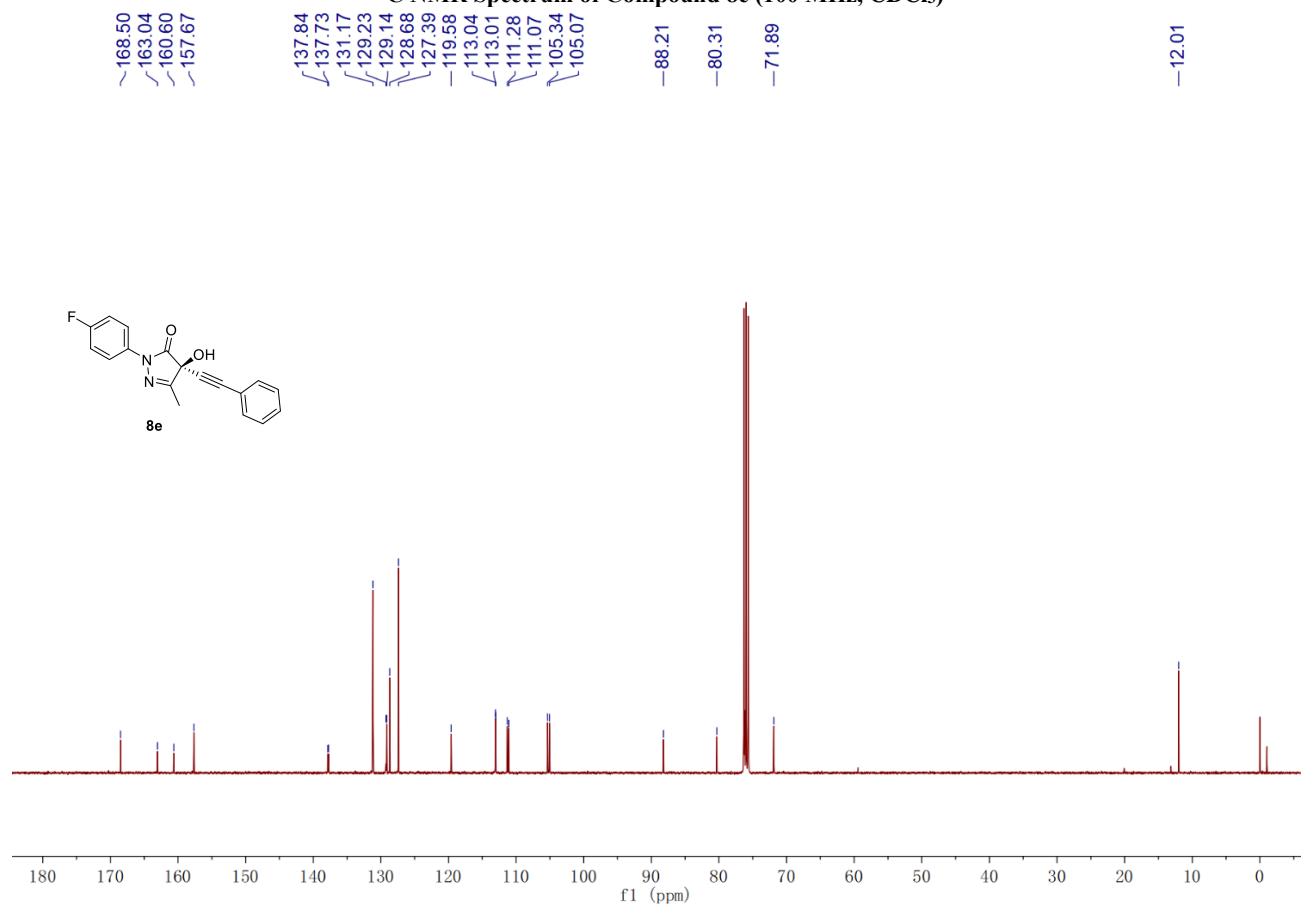

# SUPPORTING INFORMATION

<sup>19</sup>F NMR Spectrum of Compound **8e** (376 MHz, CDCl<sub>3</sub>)

---111.06

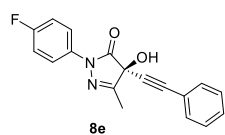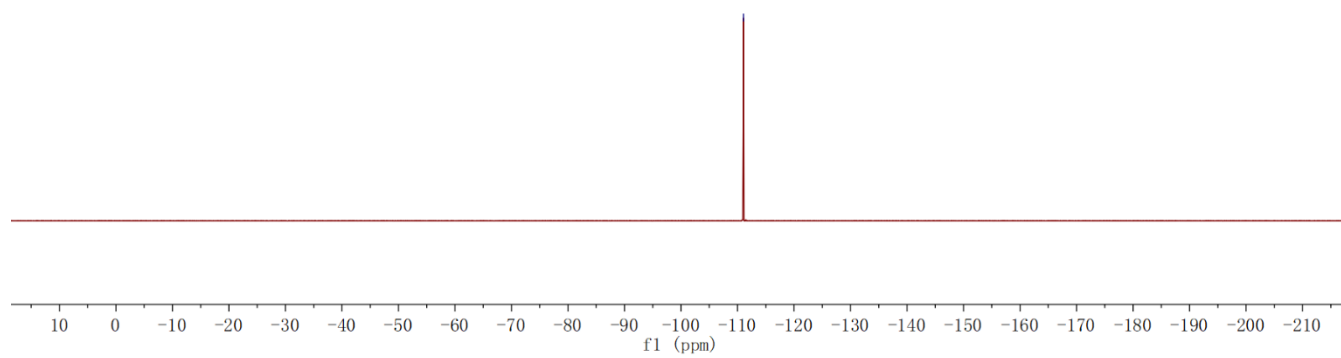

# SUPPORTING INFORMATION

**<sup>1</sup>H NMR Spectrum of Compound 8f (400 MHz, CDCl<sub>3</sub>)**

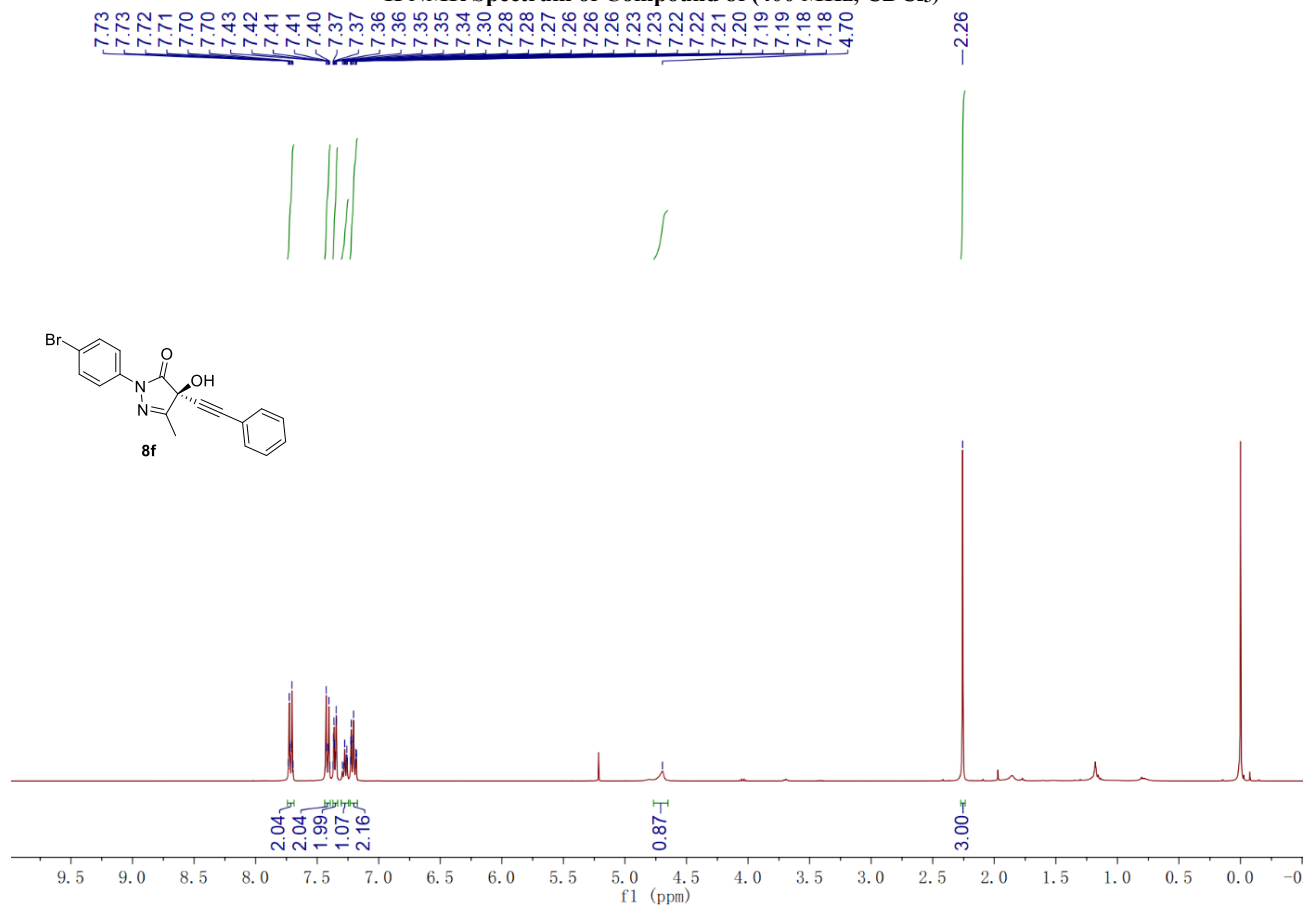

**<sup>13</sup>C NMR Spectrum of Compound 8f (100 MHz, CDCl<sub>3</sub>)**

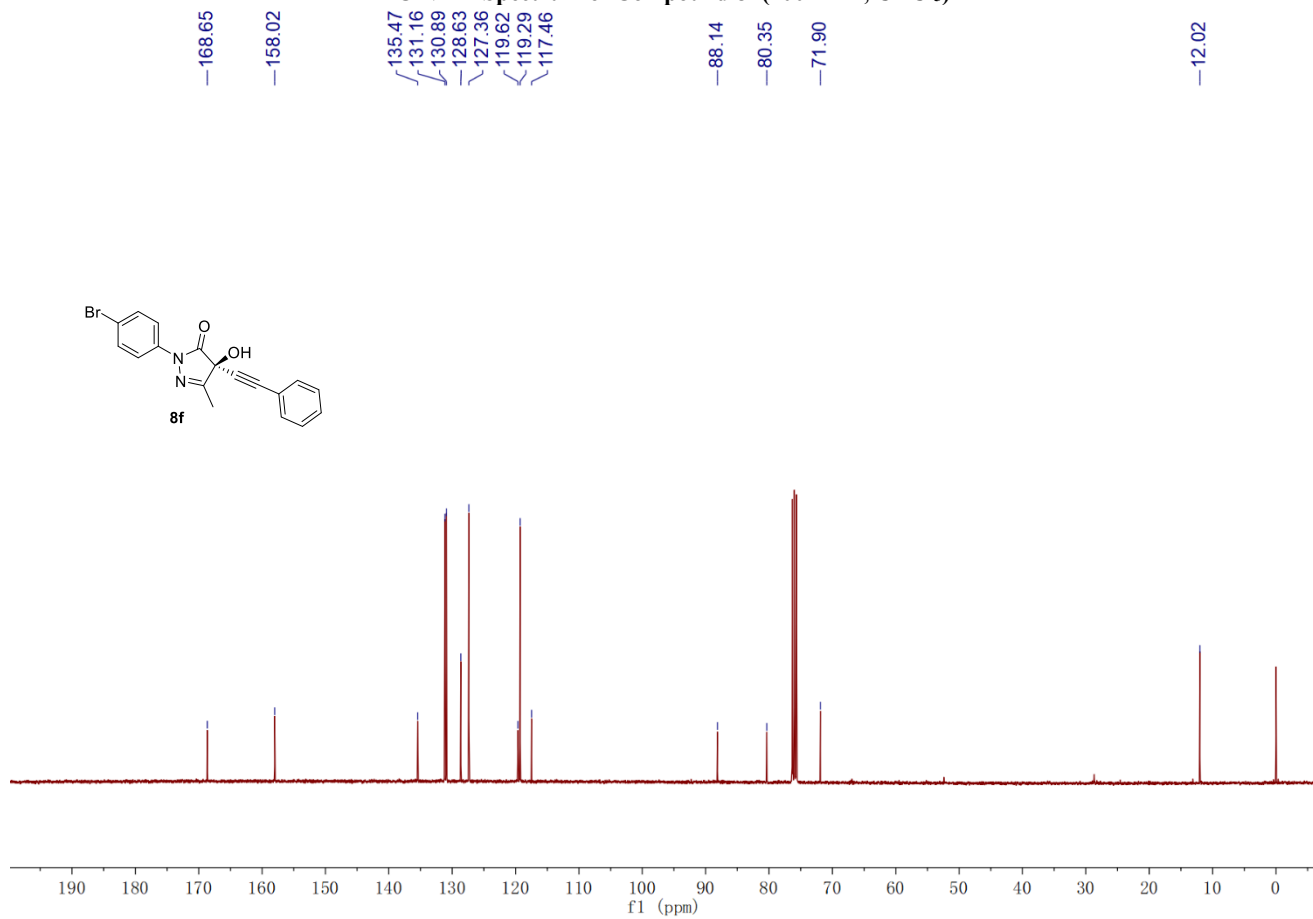

# SUPPORTING INFORMATION

<sup>1</sup>H NMR Spectrum of Compound 8g (400 MHz, CDCl<sub>3</sub>)

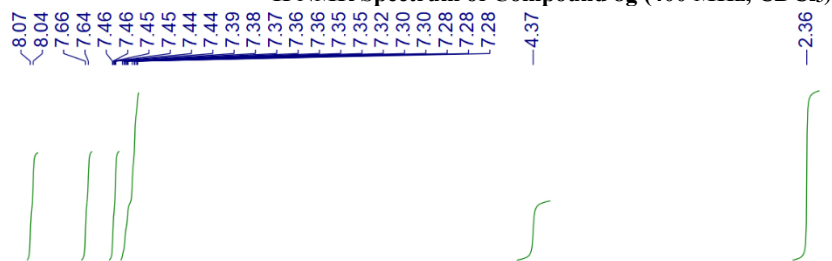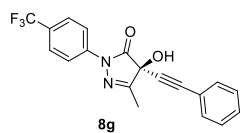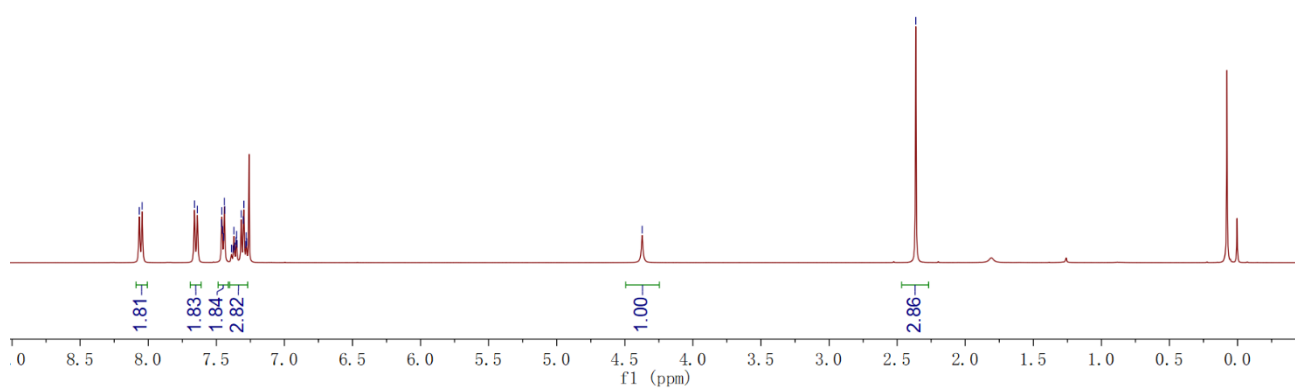

<sup>13</sup>C NMR Spectrum of Compound 8g (100 MHz, CDCl<sub>3</sub>)

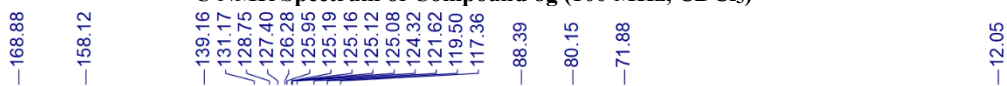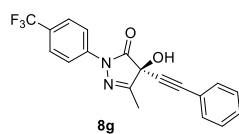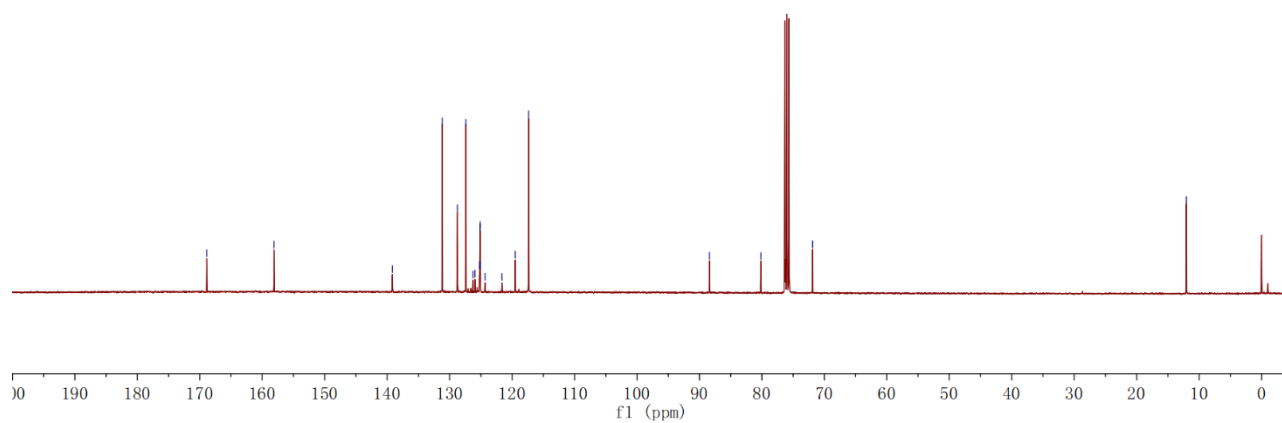

# SUPPORTING INFORMATION

## $^{19}\text{F}$ NMR Spectrum of Compound 8g (376 MHz, $\text{CDCl}_3$ )

62.23

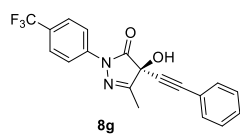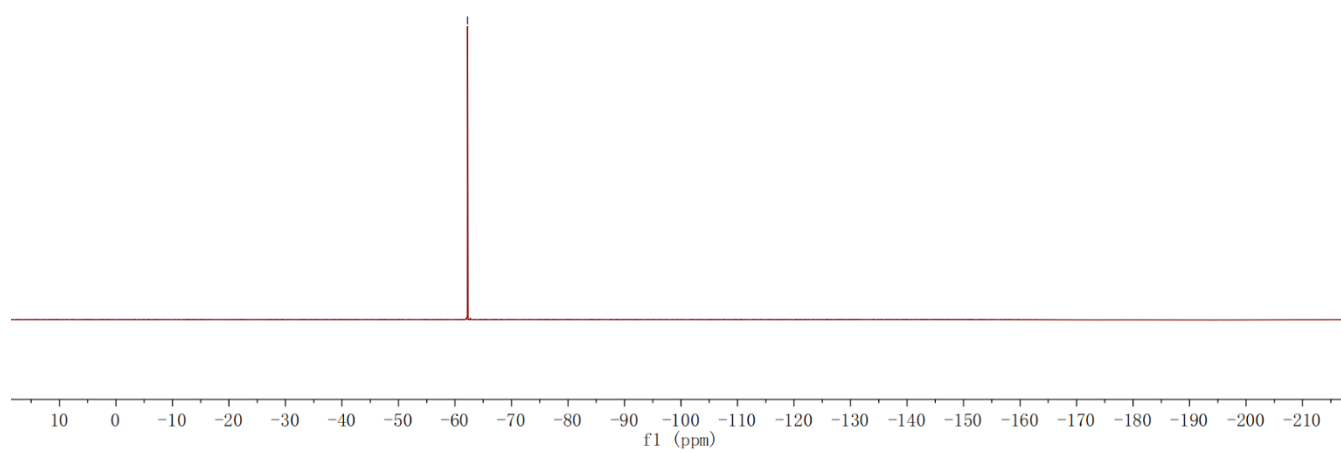

# SUPPORTING INFORMATION

<sup>1</sup>H NMR Spectrum of Compound 8h (400 MHz, CDCl<sub>3</sub>)

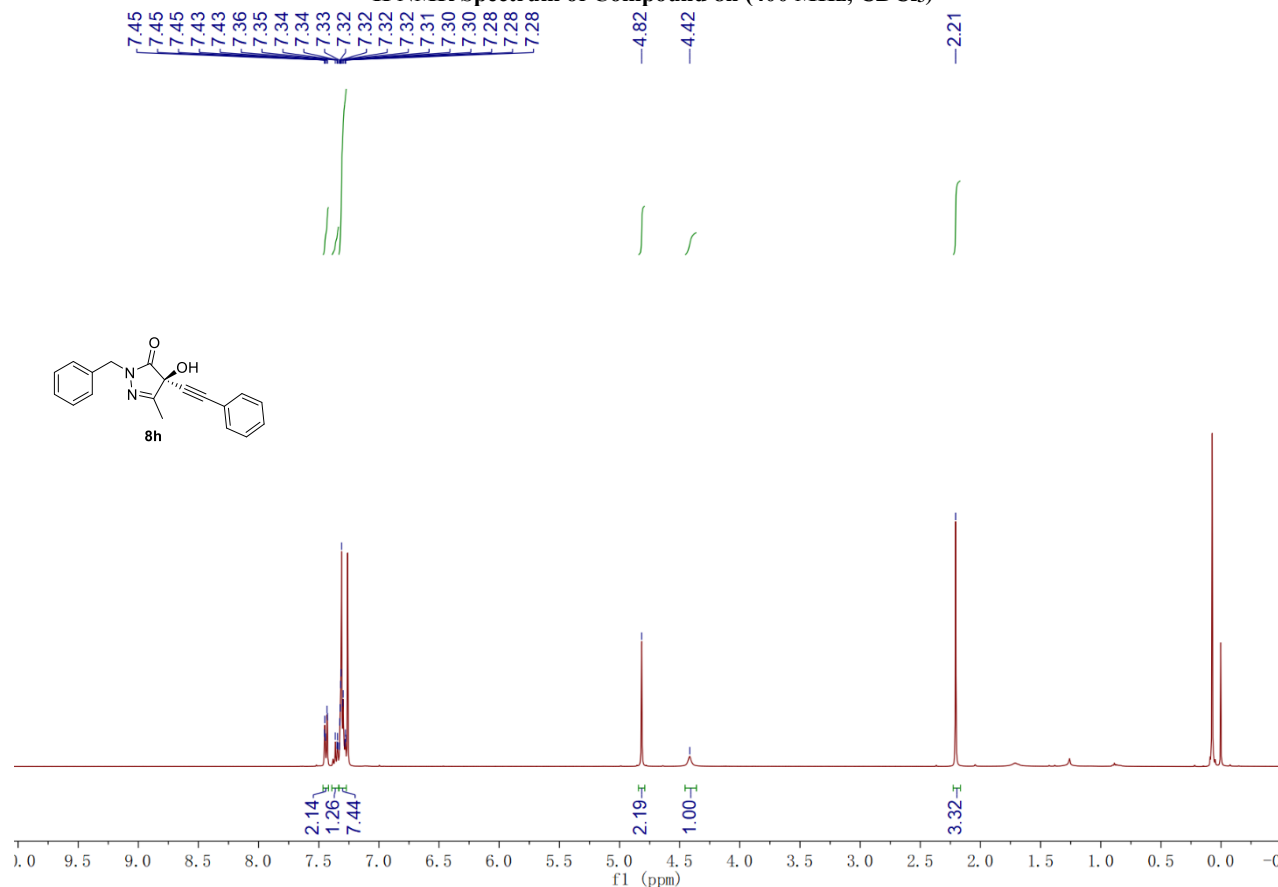

<sup>13</sup>C NMR Spectrum of Compound 8h (100 MHz, CDCl<sub>3</sub>)

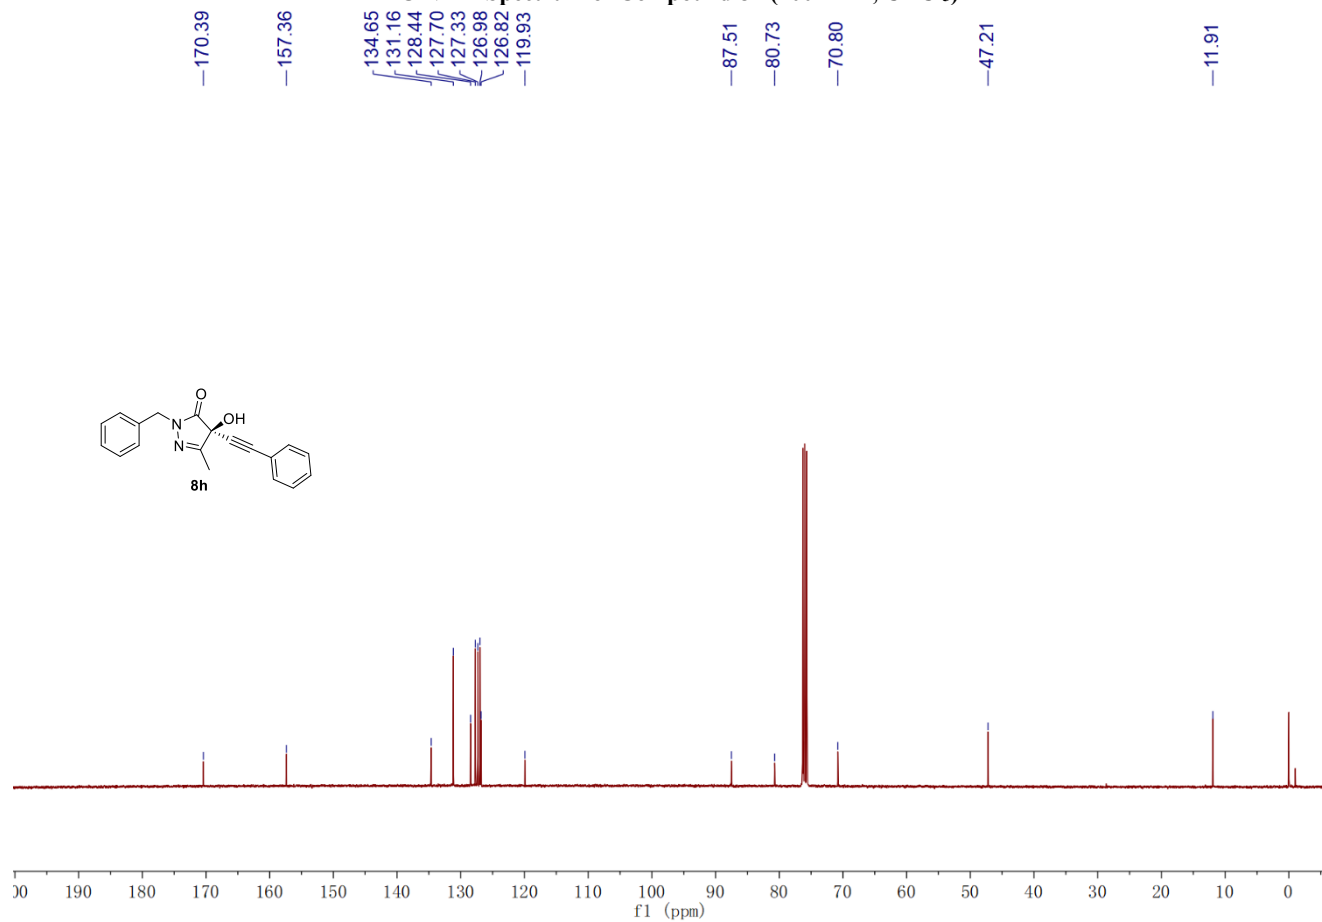

# SUPPORTING INFORMATION

<sup>1</sup>H NMR Spectrum of Compound 8i (400 MHz, CDCl<sub>3</sub>)

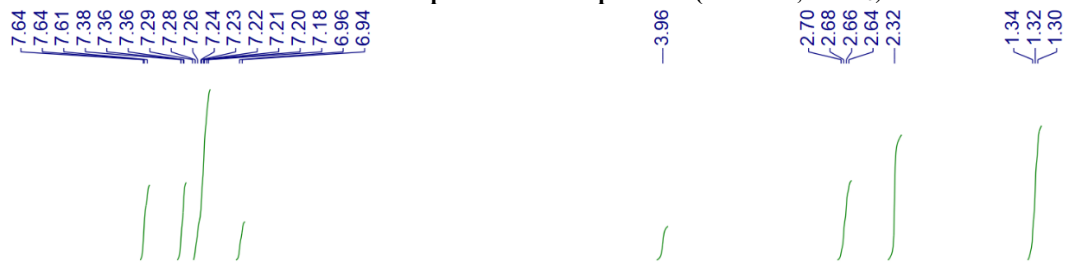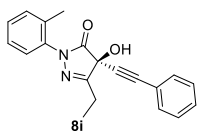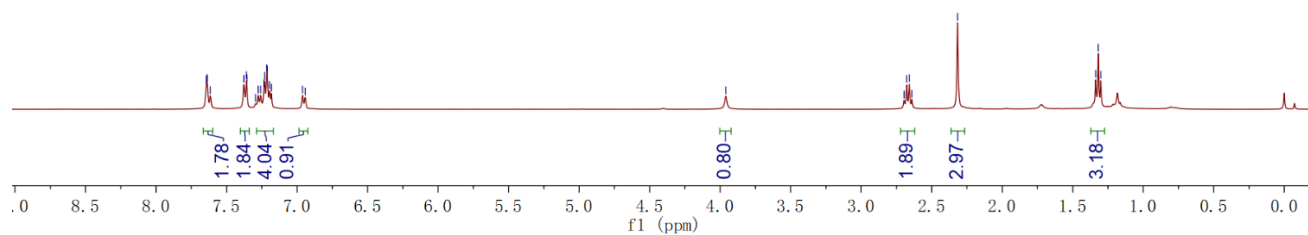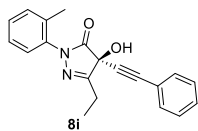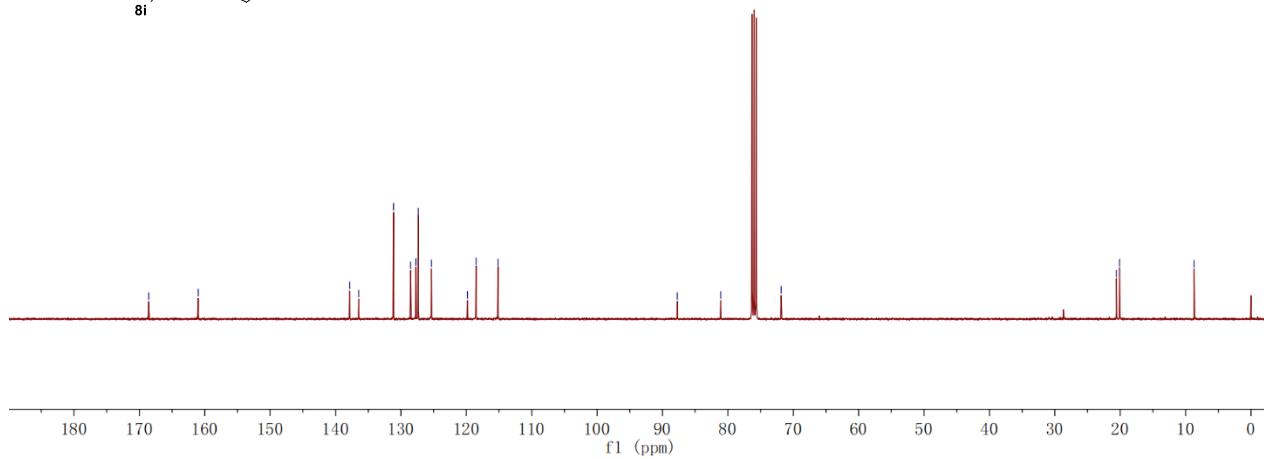

# SUPPORTING INFORMATION

**<sup>1</sup>H NMR Spectrum of Compound 8j (400 MHz, CDCl<sub>3</sub>)**

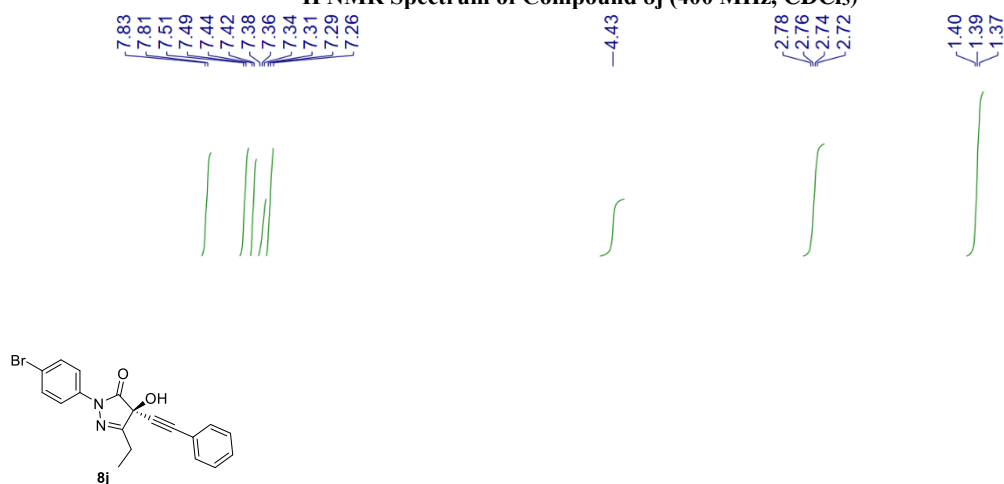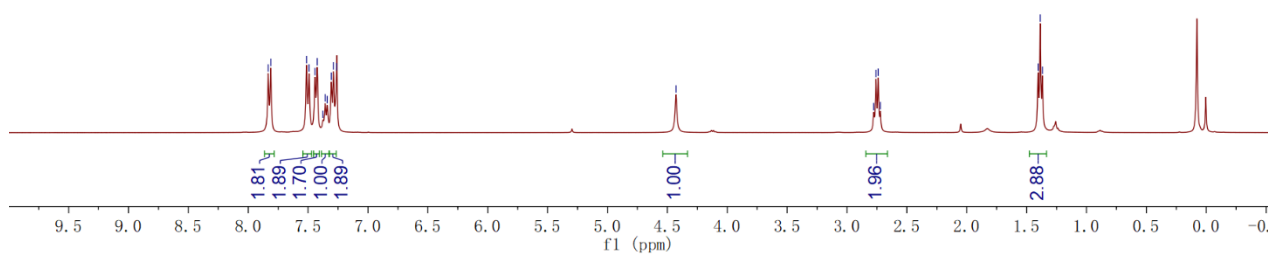

**<sup>13</sup>C NMR Spectrum of Compound 8j (150 MHz, CDCl<sub>3</sub>)**

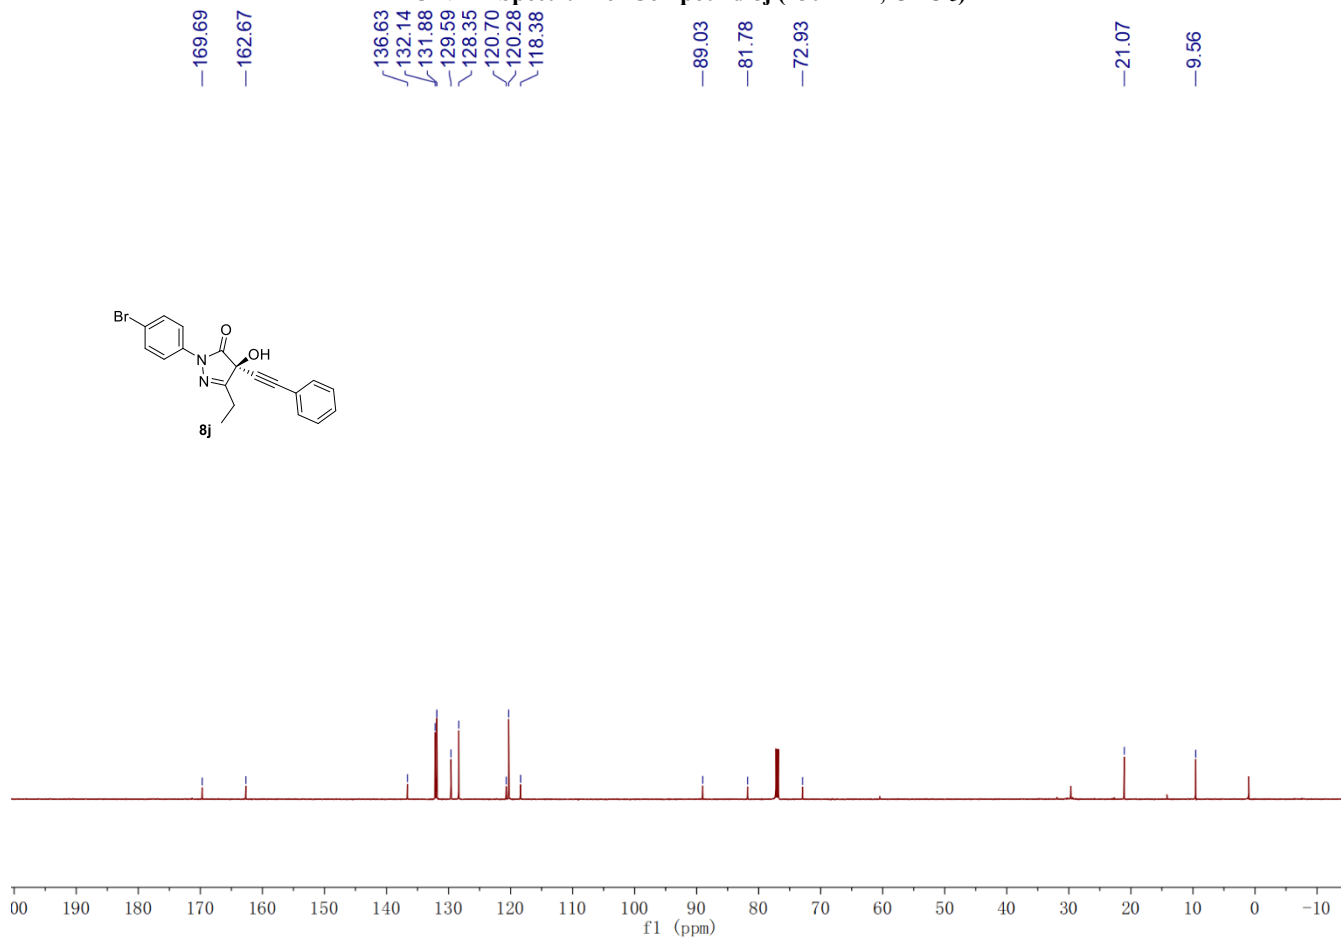



# SUPPORTING INFORMATION

**<sup>1</sup>H NMR Spectrum of Compound 8k (400 MHz, CDCl<sub>3</sub>)**

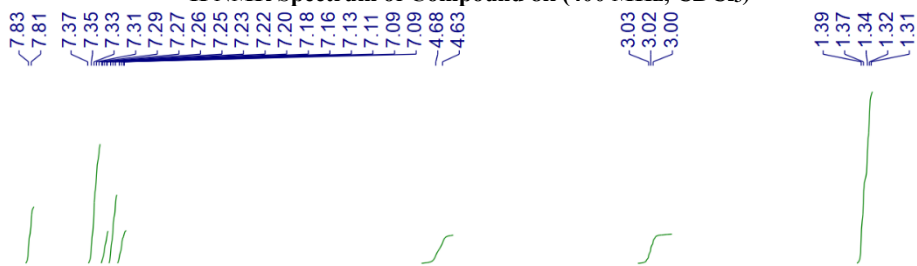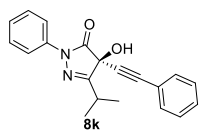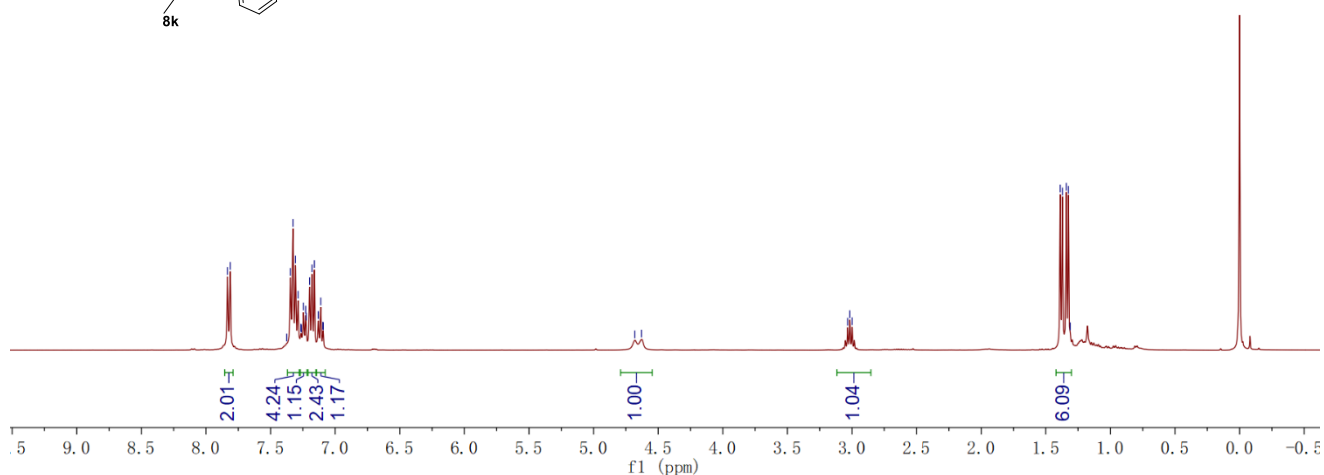

**<sup>13</sup>C NMR Spectrum of Compound 8k (100 MHz, CDCl<sub>3</sub>)**

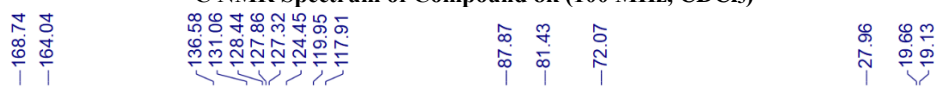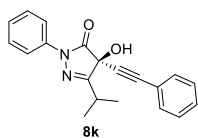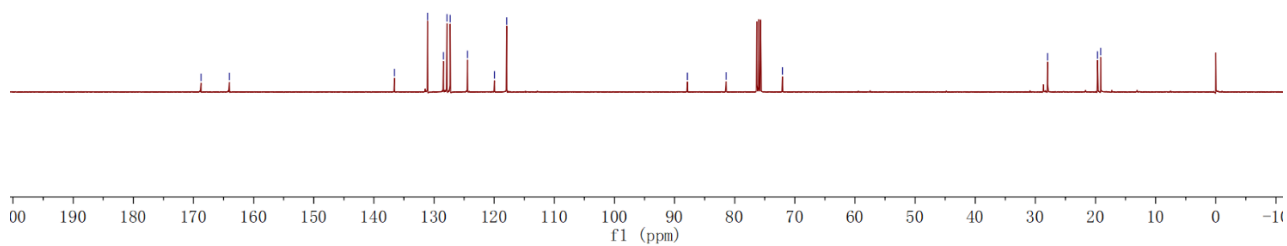

# SUPPORTING INFORMATION

**<sup>1</sup>H NMR Spectrum of Compound 8I (400 MHz, CDCl<sub>3</sub>)**

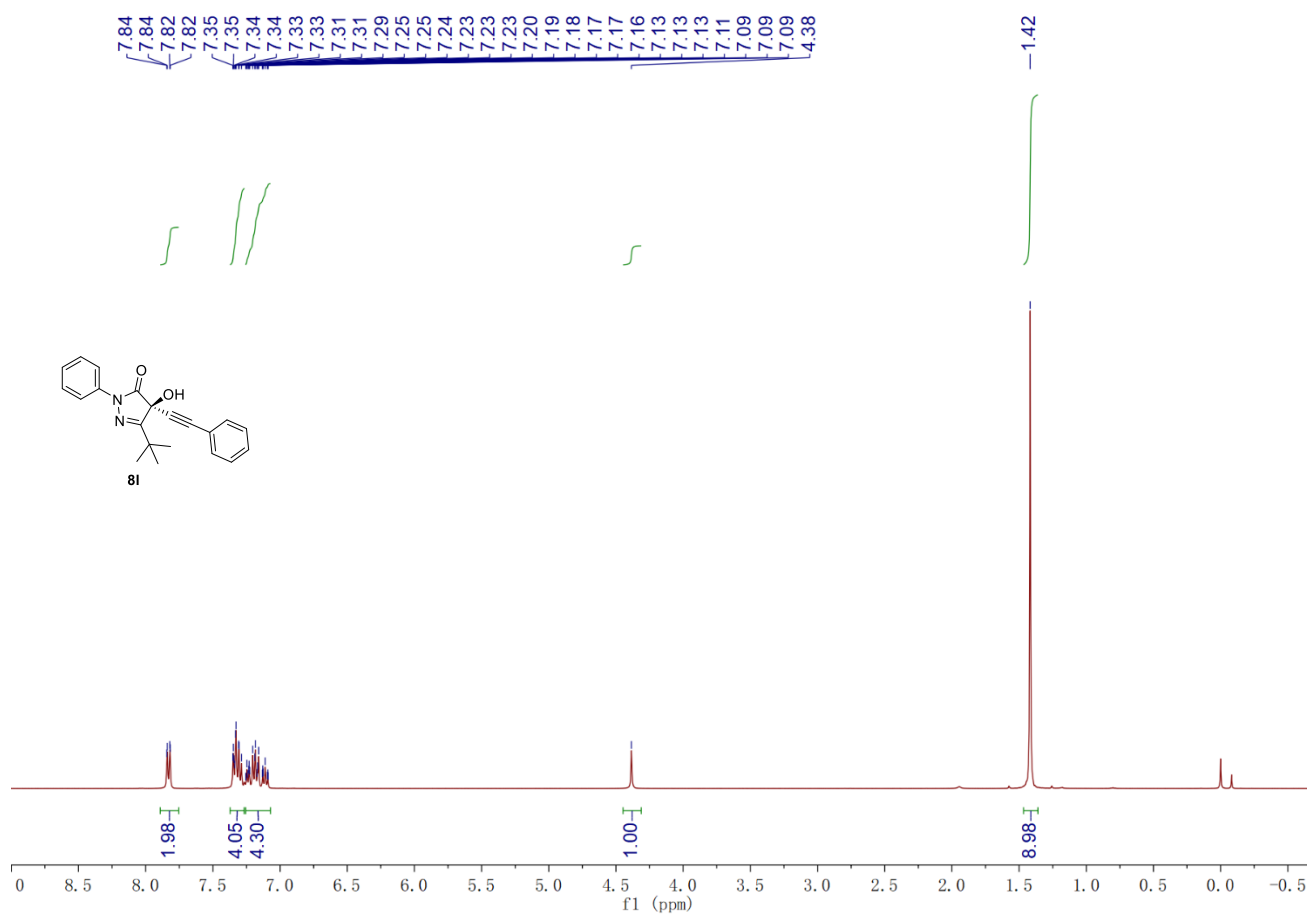

**<sup>13</sup>C NMR Spectrum of Compound 8I (100 MHz, CDCl<sub>3</sub>)**

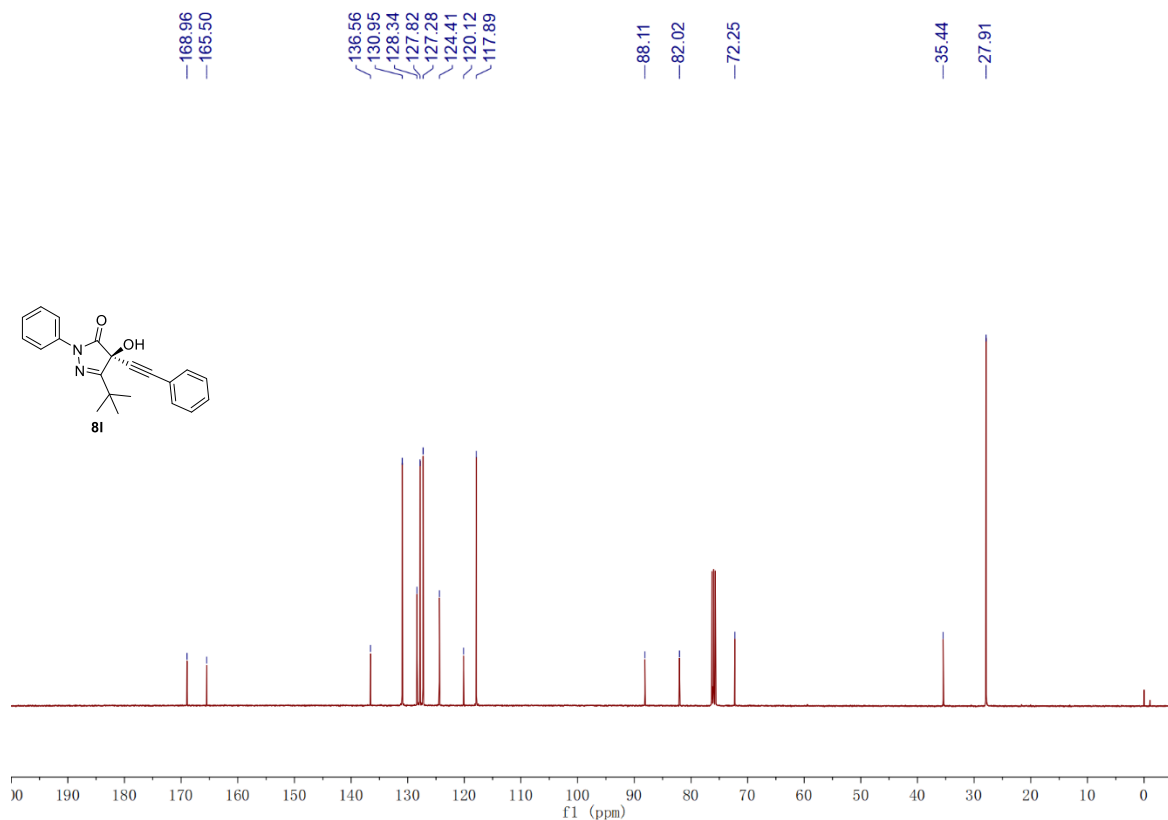

# SUPPORTING INFORMATION

**<sup>1</sup>H NMR Spectrum of Compound 8m (400 MHz, DMSO-*d*<sub>6</sub>)**

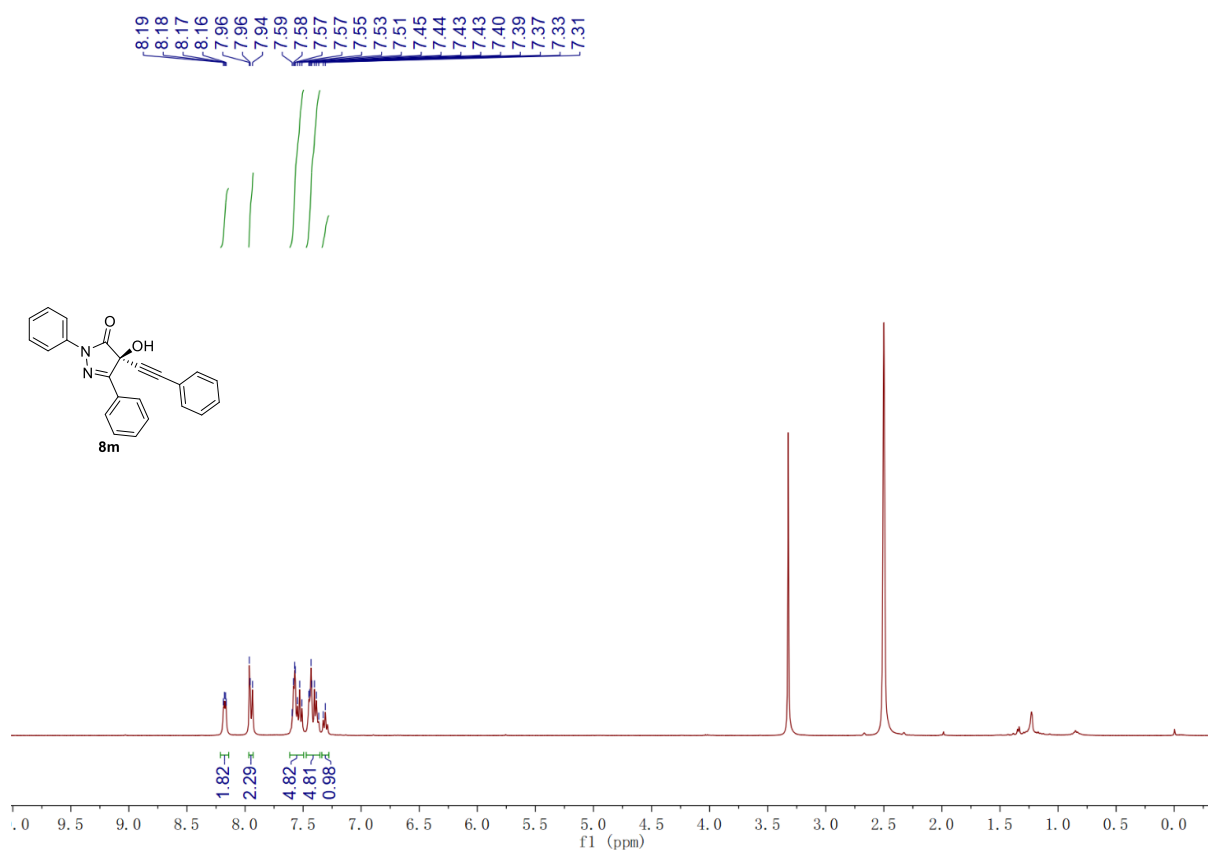

**<sup>13</sup>C NMR Spectrum of Compound 8m (100 MHz, DMSO-*d*<sub>6</sub>)**

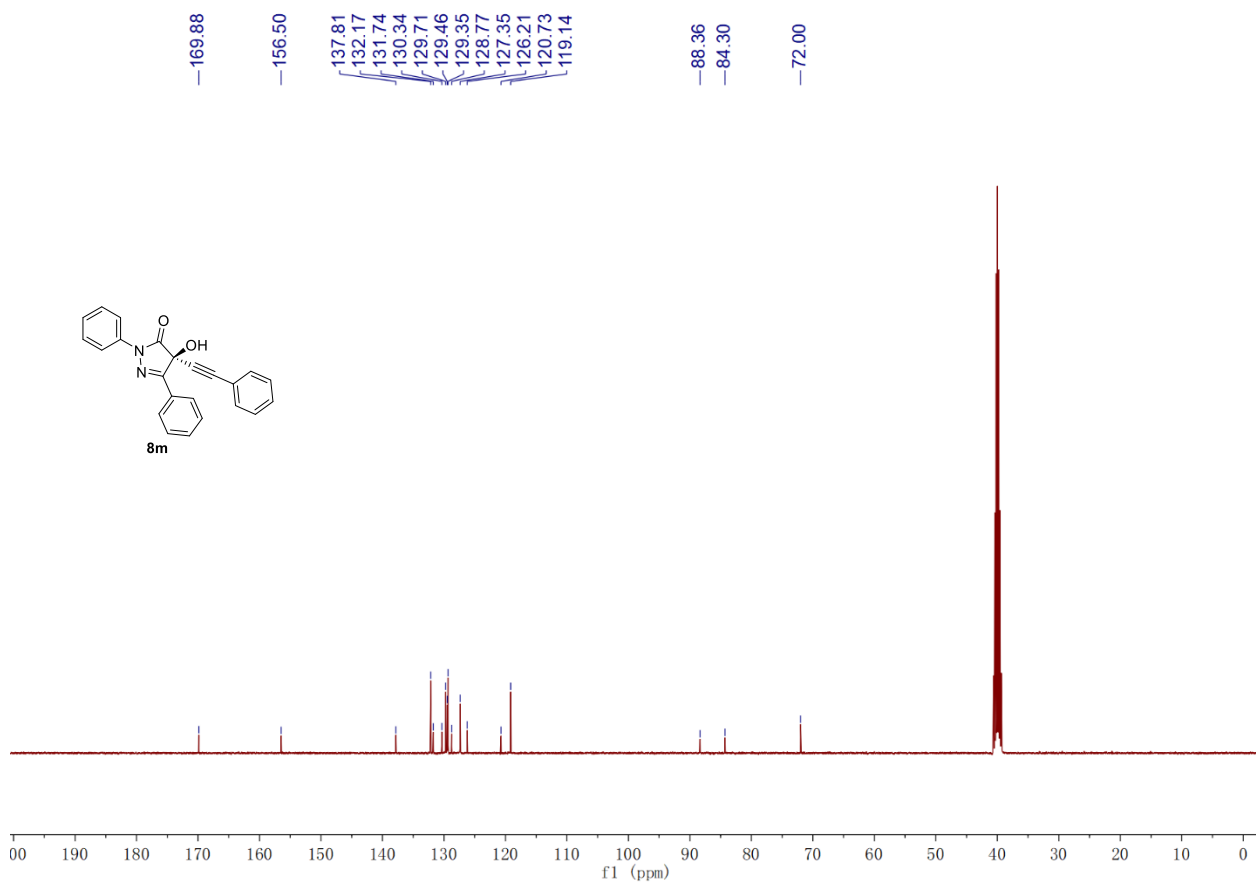

# SUPPORTING INFORMATION

## 5.HPLC Spectra

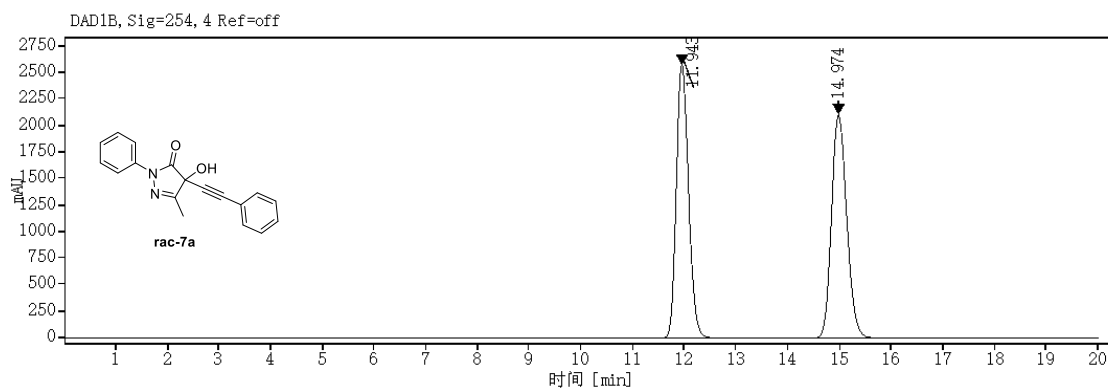

| RetTime [min] | Type | Width [min] | Area [mAU * s] | Height [mAU] | Area% |
|---------------|------|-------------|----------------|--------------|-------|
| 11.943        | BV   | 1.56        | 42403.79       | 2570.19      | 49.64 |
| 14.974        | BB   | 1.74        | 43016.37       | 2101.85      | 50.36 |

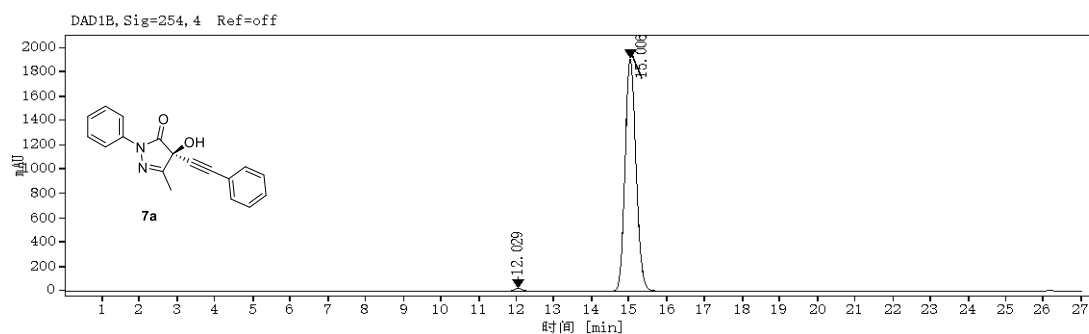

| RetTime [min] | Type | Width [min] | Area [mAU * s] | Height [mAU] | Area% |
|---------------|------|-------------|----------------|--------------|-------|
| 12.029        | MM m | 0.24        | 336.46         | 21.88        | 0.87  |
| 15.006        | MM m | 0.31        | 38531.72       | 1913.11      | 99.13 |

# SUPPORTING INFORMATION

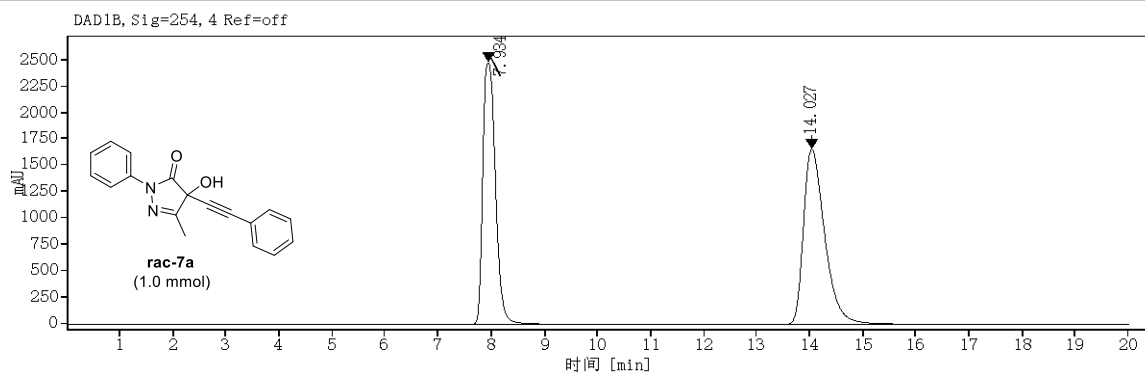

| RetTime [min] | Type | Width [min] | Area [mAU * s] | Height [mAU] | Area% |
|---------------|------|-------------|----------------|--------------|-------|
| 7.934         | VV   | 1.88        | 41002.92       | 2477.82      | 47.07 |
| 14.027        | VM m | 0.43        | 46111.21       | 1656.34      | 52.93 |

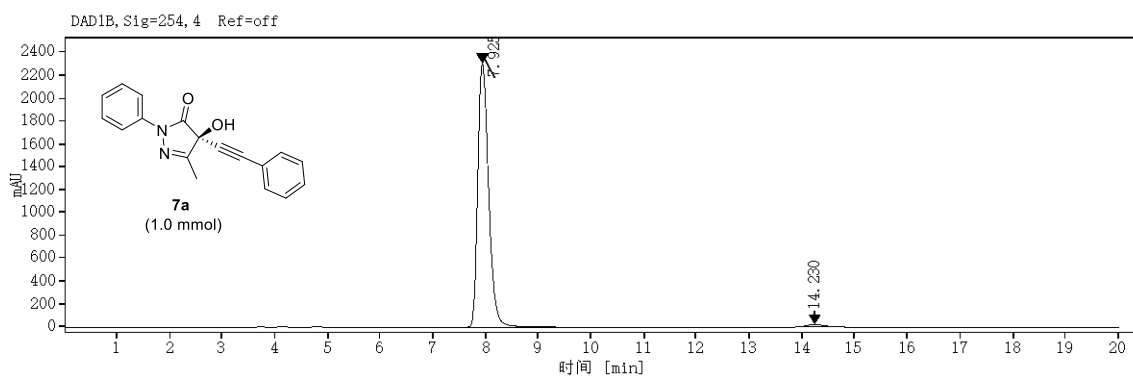

| RetTime [min] | Type | Width [min] | Area [mAU * s] | Height [mAU] | Area% |
|---------------|------|-------------|----------------|--------------|-------|
| 7.925         | BB   | 2.22        | 32991.02       | 2306.71      | 98.45 |
| 14.230        | MM m | 0.39        | 518.14         | 20.92        | 1.55  |

# SUPPORTING INFORMATION

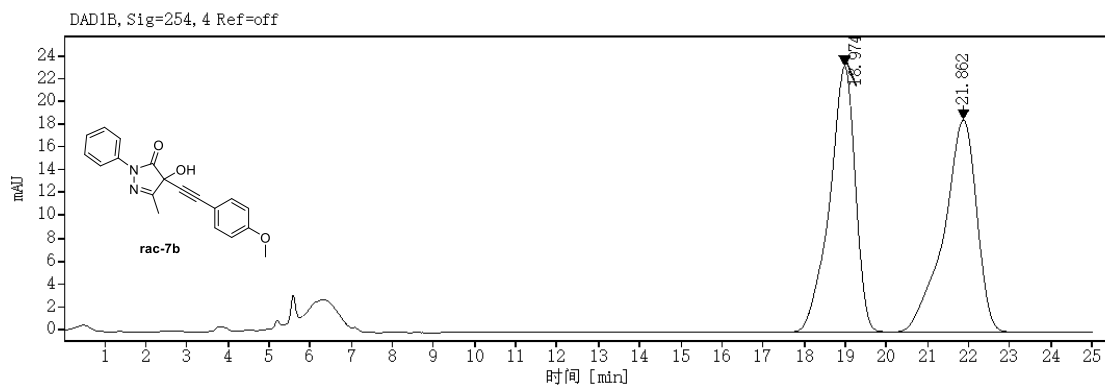

| RetTime [min] | Type | Width [min] | Area [mAU * s] | Height [mAU] | Area% |
|---------------|------|-------------|----------------|--------------|-------|
| 18.974        | BB   | 2.44        | 1008.88        | 23.21        | 49.45 |
| 21.862        | BB   | 3.06        | 1031.14        | 18.55        | 50.55 |

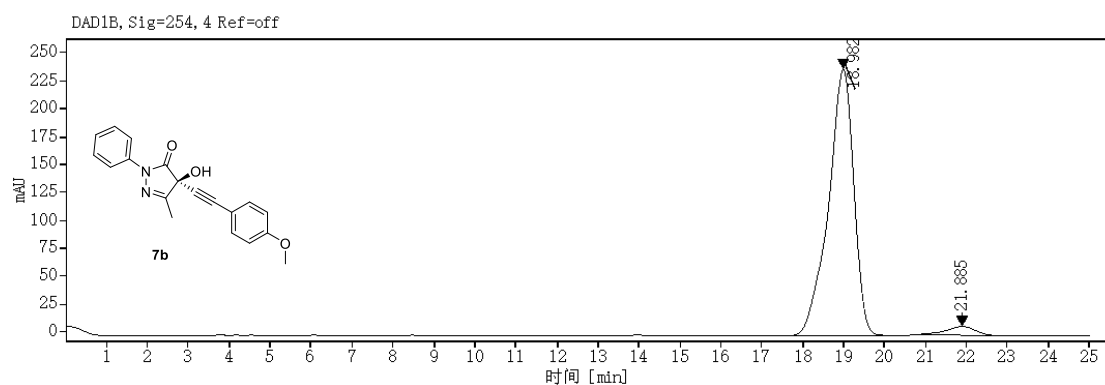

| RetTime [min] | Type | Width [min] | Area [mAU * s] | Height [mAU] | Area% |
|---------------|------|-------------|----------------|--------------|-------|
| 18.982        | MM m | 0.64        | 10232.81       | 238.00       | 96.36 |
| 21.885        | MB m | 0.74        | 386.09         | 7.64         | 3.64  |

# SUPPORTING INFORMATION

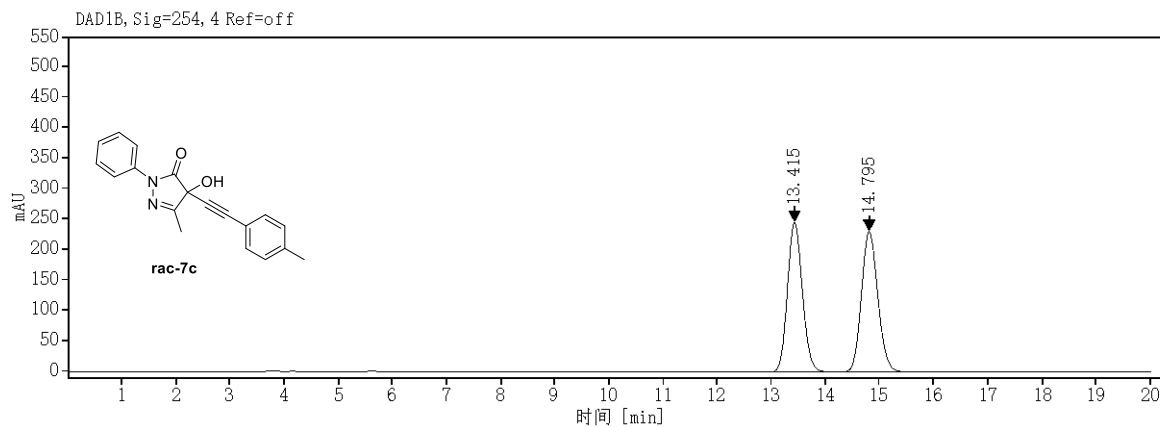

| RetTime [min] | Type | Width [min] | Area [mAU * s] | Height [mAU] | Area% |
|---------------|------|-------------|----------------|--------------|-------|
| 13.415        | BB   | 1.38        | 4719.95        | 246.10       | 49.26 |
| 14.795        | BB   | 1.98        | 4862.32        | 230.86       | 50.74 |

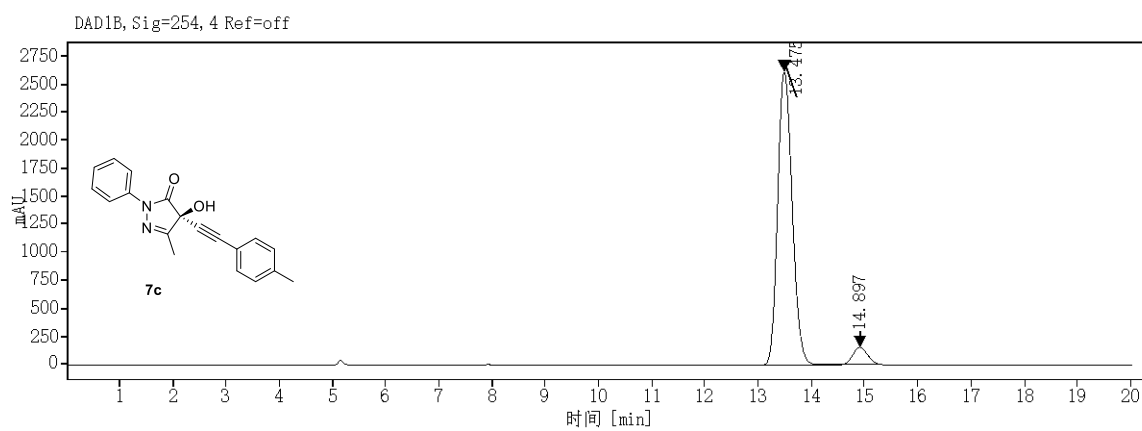

| RetTime [min] | Type | Width [min] | Area [mAU * s] | Height [mAU] | Area% |
|---------------|------|-------------|----------------|--------------|-------|
| 13.475        | MM m | 0.29        | 49310.90       | 2608.40      | 94.77 |
| 14.897        | MM m | 0.29        | 2720.80        | 150.86       | 5.23  |

# SUPPORTING INFORMATION

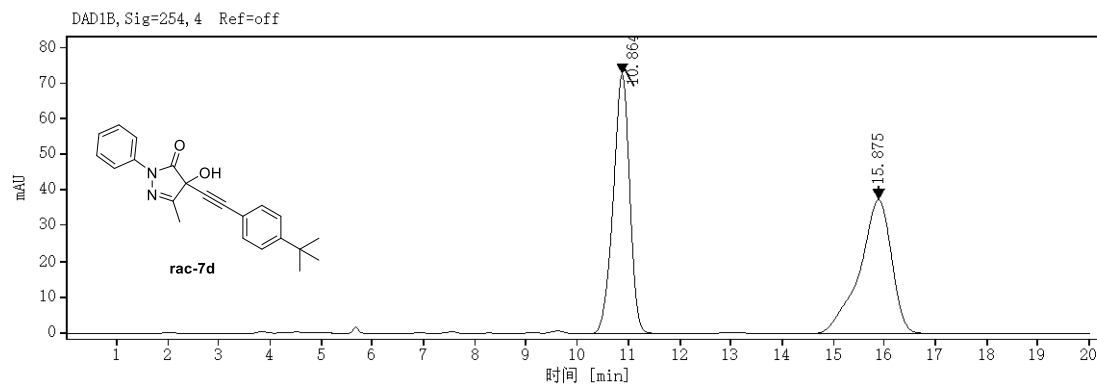

| RetTime [min] | Type | Width [min] | Area [mAU * s] | Height [mAU] | Area% |
|---------------|------|-------------|----------------|--------------|-------|
| 10.864        | BB   | 1.89        | 1625.58        | 72.80        | 49.81 |
| 15.875        | BB   | 3.21        | 1637.78        | 37.53        | 50.19 |

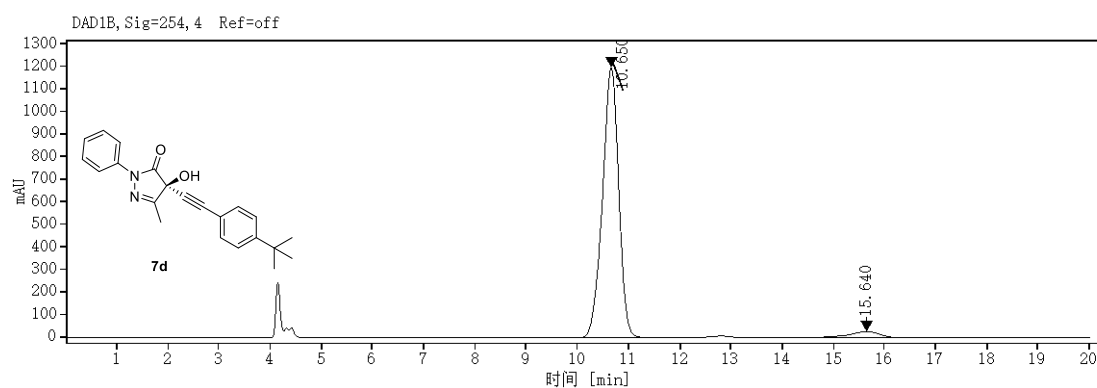

| RetTime [min] | Type | Width [min] | Area [mAU * s] | Height [mAU] | Area% |
|---------------|------|-------------|----------------|--------------|-------|
| 10.650        | MM m | 0.34        | 26479.81       | 1200.28      | 96.28 |
| 15.640        | MM m | 0.59        | 1022.27        | 26.13        | 3.72  |



# SUPPORTING INFORMATION

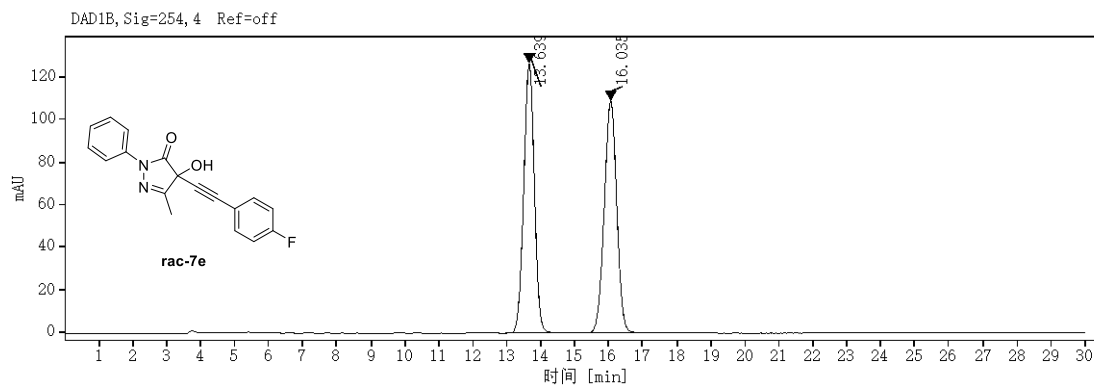

| RetTime [min] | Type | Width [min] | Area [mAU * s] | Height [mAU] | Area% |
|---------------|------|-------------|----------------|--------------|-------|
| 13.639        | BB   | 2.22        | 2750.40        | 126.57       | 49.65 |
| 16.035        | BB   | 2.74        | 2789.26        | 108.97       | 50.35 |

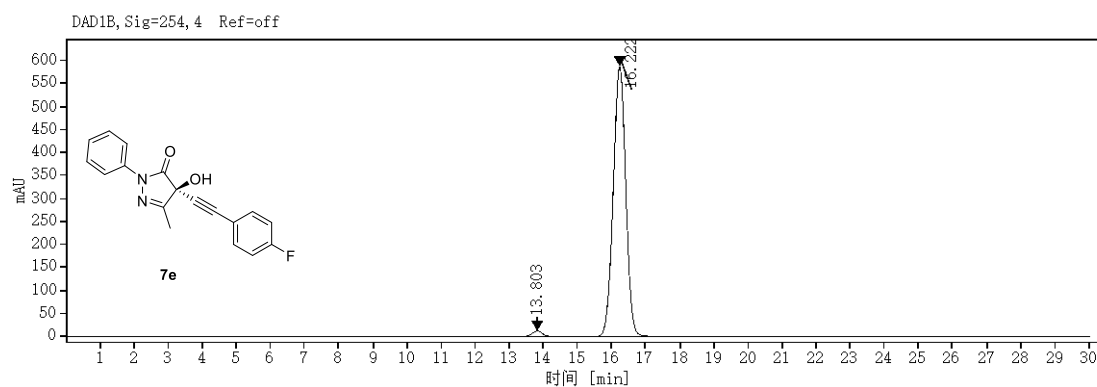

| RetTime [min] | Type | Width [min] | Area [mAU * s] | Height [mAU] | Area% |
|---------------|------|-------------|----------------|--------------|-------|
| 13.803        | BB   | 1.32        | 267.65         | 12.26        | 1.75  |
| 16.222        | BB   | 3.28        | 15032.14       | 588.26       | 98.25 |

# SUPPORTING INFORMATION

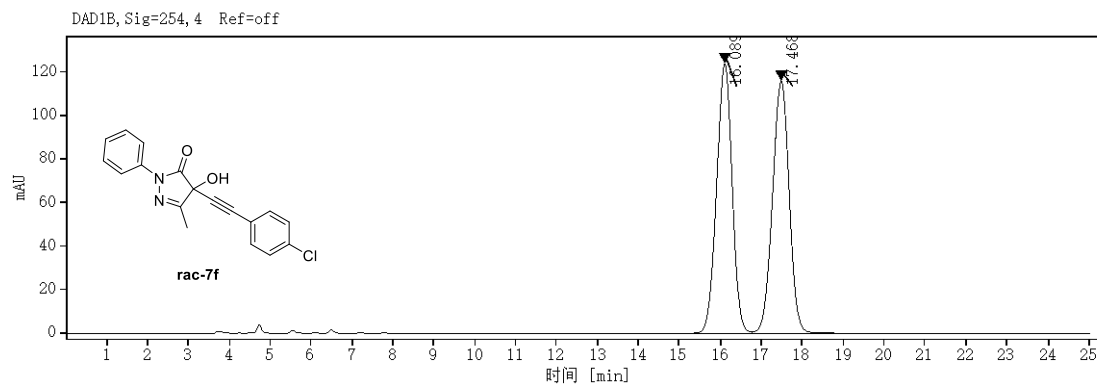

| RetTime [min] | Type | Width [min] | Area [mAU * s] | Height [mAU] | Area% |
|---------------|------|-------------|----------------|--------------|-------|
| 16.089        | BV   | 1.66        | 3286.72        | 124.33       | 50.00 |
| 17.468        | VB   | 2.21        | 3286.59        | 116.22       | 50.00 |

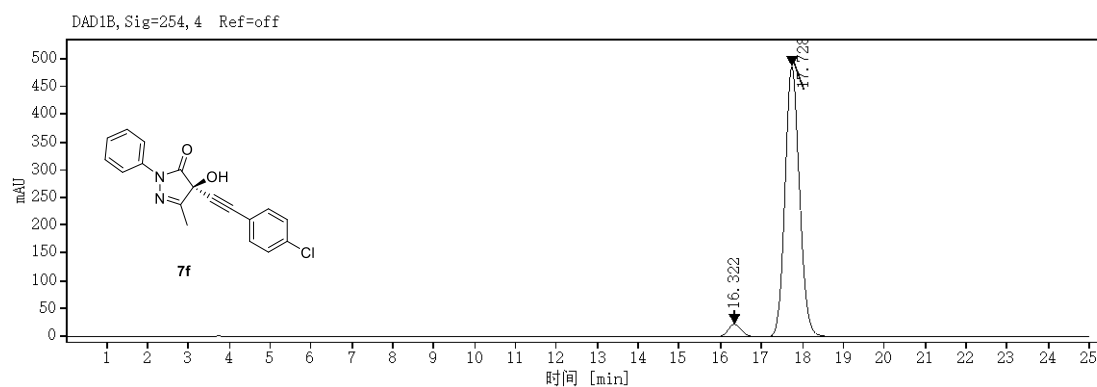

| RetTime [min] | Type | Width [min] | Area [mAU * s] | Height [mAU] | Area% |
|---------------|------|-------------|----------------|--------------|-------|
| 16.322        | MM m | 0.34        | 495.45         | 22.37        | 3.95  |
| 17.728        | BB   | 2.14        | 12037.73       | 487.72       | 96.05 |

# SUPPORTING INFORMATION

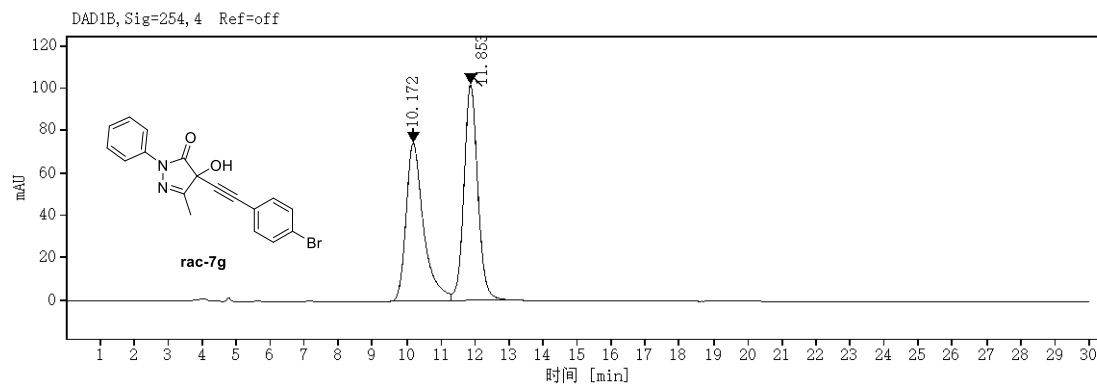

| RetTime [min] | Type | Width [min] | Area [mAU * s] | Height [mAU] | Area% |
|---------------|------|-------------|----------------|--------------|-------|
| 10.172        | BM m | 0.53        | 2658.71        | 74.70        | 48.13 |
| 11.853        | MM m | 0.43        | 2865.06        | 101.96       | 51.87 |

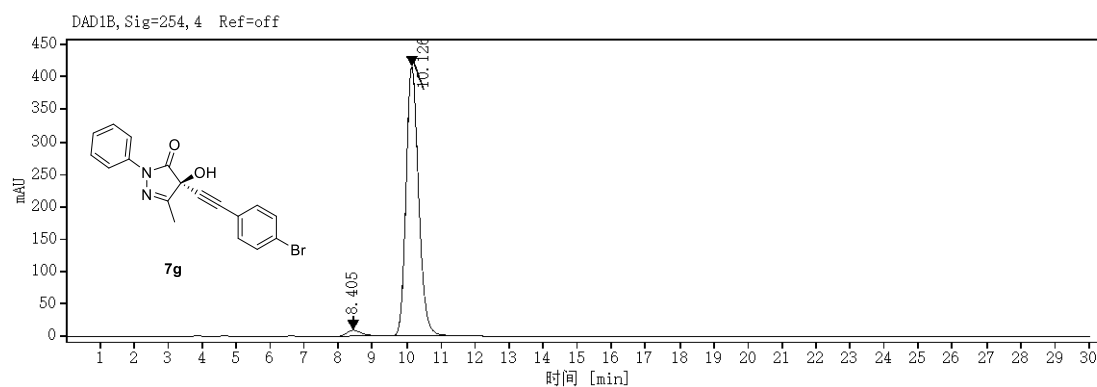

| RetTime [min] | Type | Width [min] | Area [mAU * s] | Height [mAU] | Area% |
|---------------|------|-------------|----------------|--------------|-------|
| 8.405         | BM m | 0.43        | 255.10         | 8.92         | 2.34  |
| 10.126        | BB   | 1.88        | 10656.74       | 417.17       | 97.66 |

# SUPPORTING INFORMATION

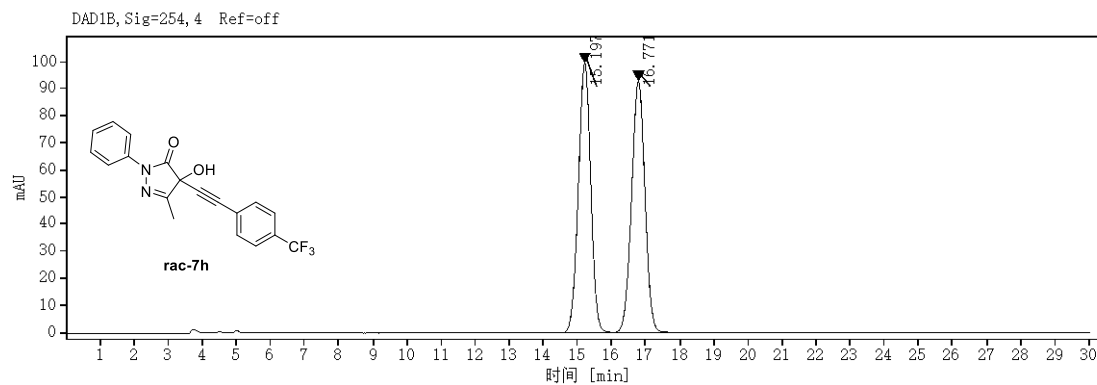

| RetTime [min] | Type | Width [min] | Area [mAU * s] | Height [mAU] | Area% |
|---------------|------|-------------|----------------|--------------|-------|
| 15.197        | BB   | 1.62        | 2511.24        | 99.31        | 49.84 |
| 16.771        | BB   | 2.36        | 2527.34        | 92.60        | 50.16 |

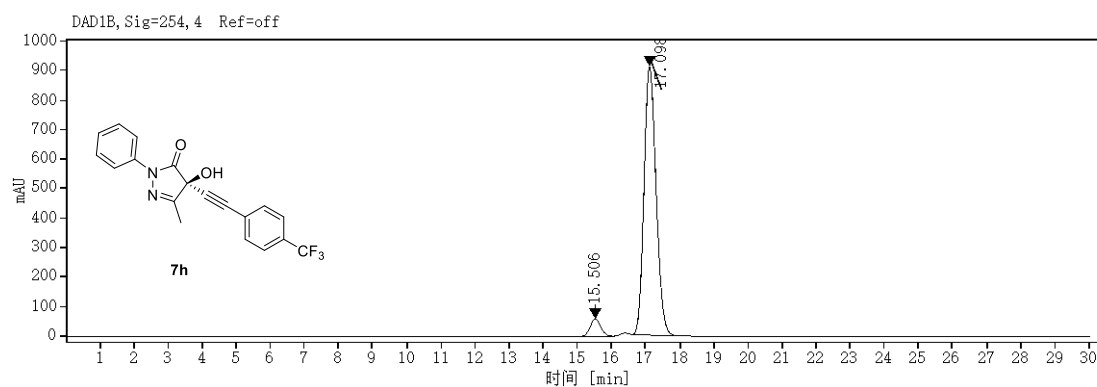

| RetTime [min] | Type | Width [min] | Area [mAU * s] | Height [mAU] | Area% |
|---------------|------|-------------|----------------|--------------|-------|
| 15.506        | MM m | 0.33        | 1249.64        | 58.44        | 5.30  |
| 17.098        | MM m | 0.38        | 22328.24       | 911.21       | 94.70 |

# SUPPORTING INFORMATION

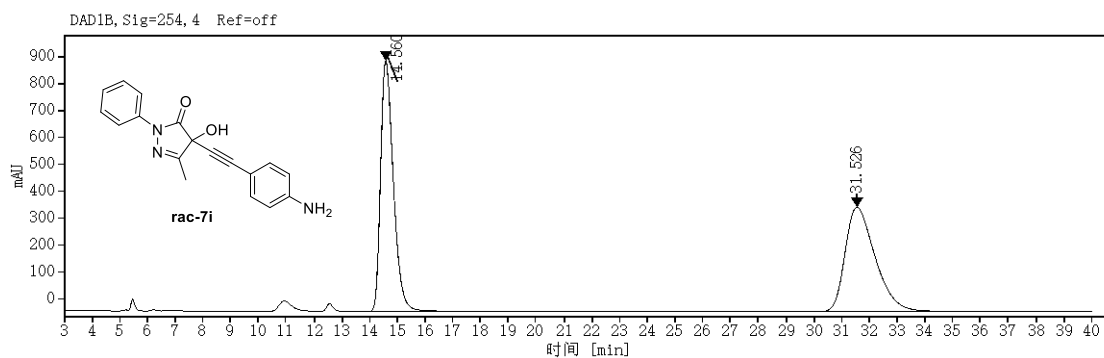

| RetTime [min] | Type | Width [min] | Area [mAU * s] | Height [mAU] | Area% |
|---------------|------|-------------|----------------|--------------|-------|
| 14.560        | BM m | 0.49        | 29735.62       | 933.51       | 50.46 |
| 31.526        | BB   | 4.67        | 29193.64       | 388.35       | 49.54 |

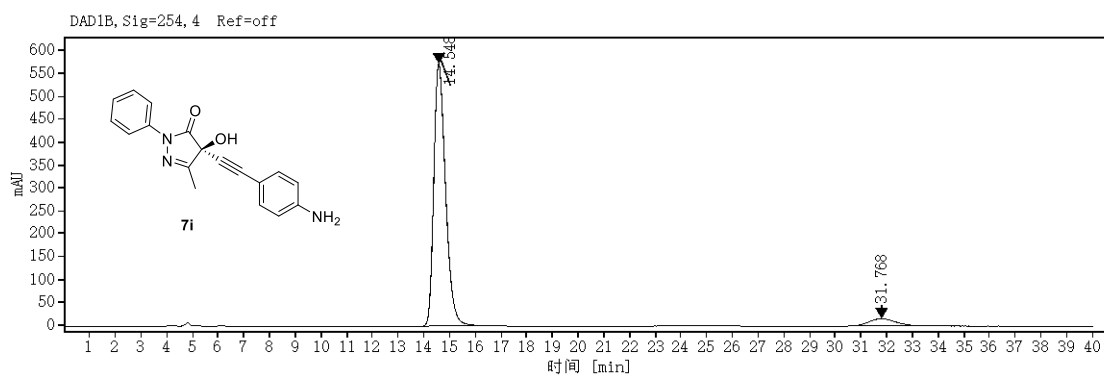

| RetTime [min] | Type | Width [min] | Area [mAU * s] | Height [mAU] | Area% |
|---------------|------|-------------|----------------|--------------|-------|
| 14.548        | BM m | 0.49        | 18086.15       | 571.83       | 94.23 |
| 31.768        | MM m | 0.85        | 1108.25        | 15.50        | 5.77  |

# SUPPORTING INFORMATION

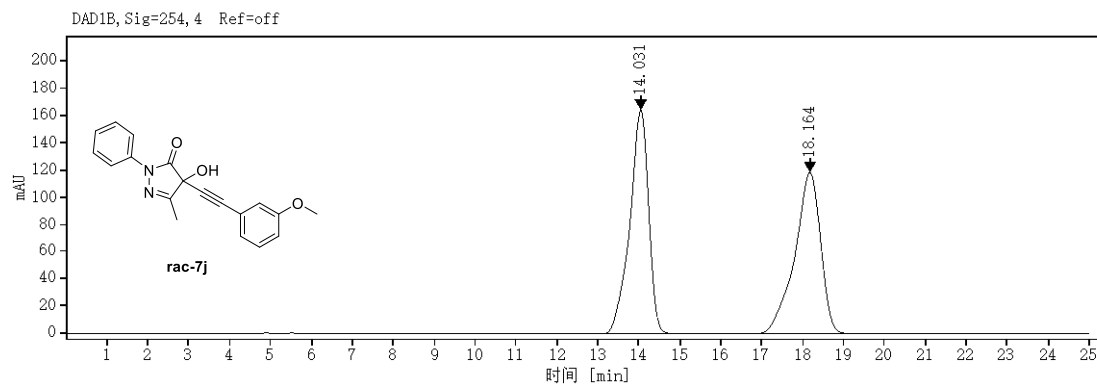

| RetTime [min] | Type | Width [min] | Area [mAU * s] | Height [mAU] | Area% |
|---------------|------|-------------|----------------|--------------|-------|
| 14.031        | BM m | 0.48        | 5251.31        | 164.30       | 50.13 |
| 18.164        | BB   | 3.13        | 5223.68        | 118.57       | 49.87 |

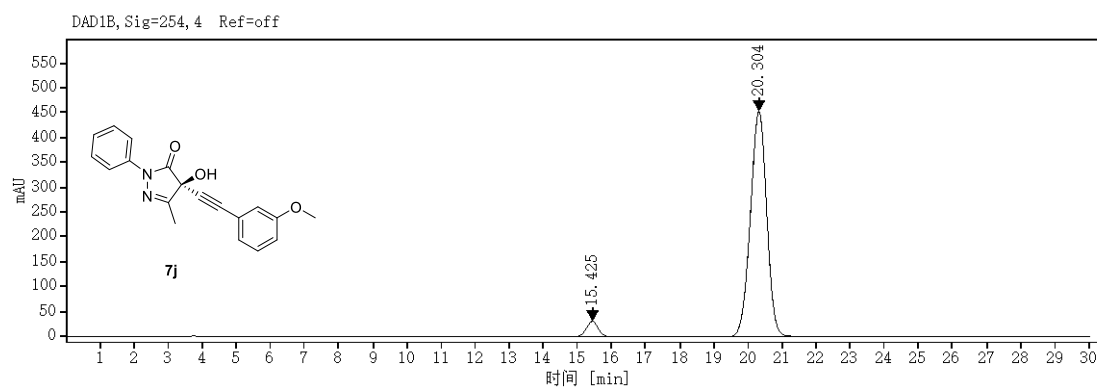

| RetTime [min] | Type | Width [min] | Area [mAU * s] | Height [mAU] | Area% |
|---------------|------|-------------|----------------|--------------|-------|
| 15.425        | BM m | 0.37        | 735.38         | 30.85        | 4.64  |
| 20.304        | BB   | 3.94        | 15115.10       | 453.62       | 95.36 |

# SUPPORTING INFORMATION

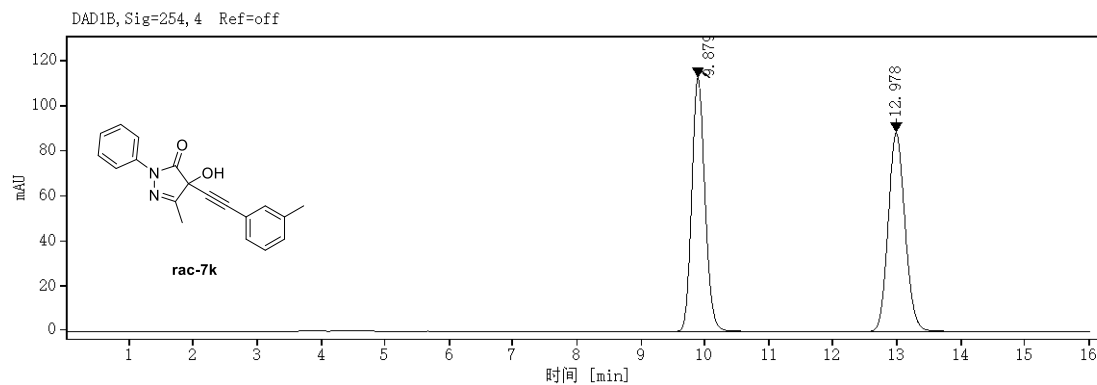

| RetTime [min] | Type | Width [min] | Area [mAU * s] | Height [mAU] | Area% |
|---------------|------|-------------|----------------|--------------|-------|
| 9.879         | BB   | 1.61        | 1614.95        | 112.65       | 49.96 |
| 12.978        | BB   | 1.53        | 1617.45        | 88.29        | 50.04 |

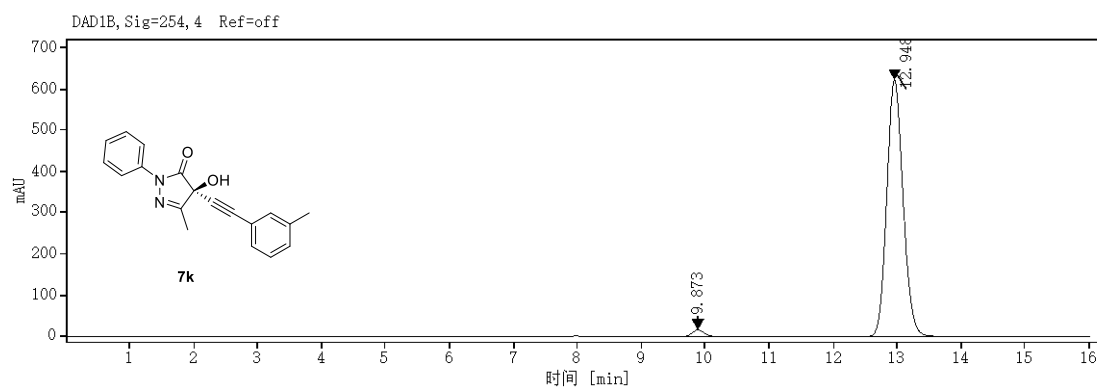

| RetTime [min] | Type | Width [min] | Area [mAU * s] | Height [mAU] | Area% |
|---------------|------|-------------|----------------|--------------|-------|
| 9.873         | MM m | 0.20        | 207.87         | 16.00        | 1.84  |
| 12.948        | BM m | 0.28        | 11067.05       | 623.36       | 98.16 |

# SUPPORTING INFORMATION

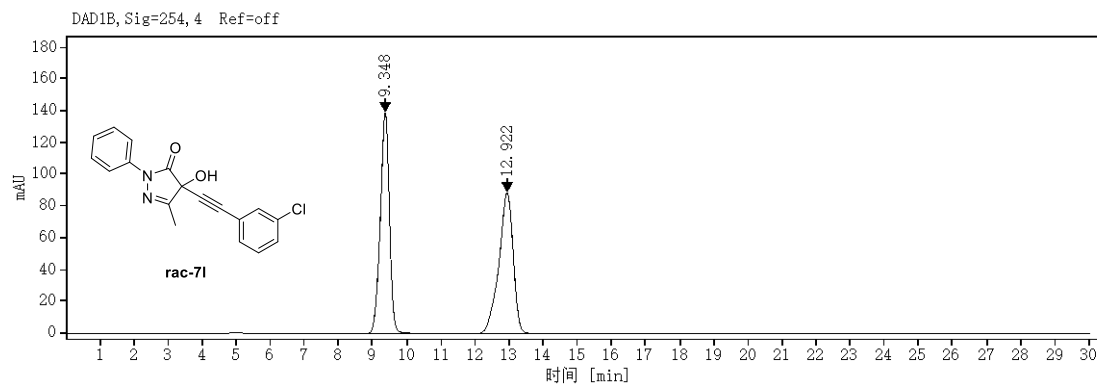

| RetTime [min] | Type | Width [min] | Area [mAU * s] | Height [mAU] | Area% |
|---------------|------|-------------|----------------|--------------|-------|
| 9.348         | BB   | 1.96        | 2595.42        | 139.32       | 50.10 |
| 12.922        | BB   | 2.06        | 2584.91        | 88.77        | 49.90 |

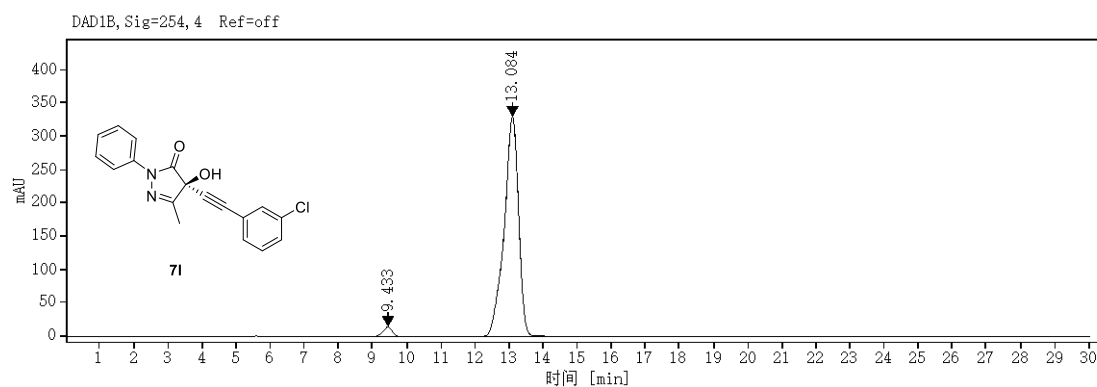

| RetTime [min] | Type | Width [min] | Area [mAU * s] | Height [mAU] | Area% |
|---------------|------|-------------|----------------|--------------|-------|
| 9.433         | MM m | 0.27        | 257.60         | 14.36        | 2.59  |
| 13.084        | BB   | 2.81        | 9688.96        | 329.48       | 97.41 |



# SUPPORTING INFORMATION

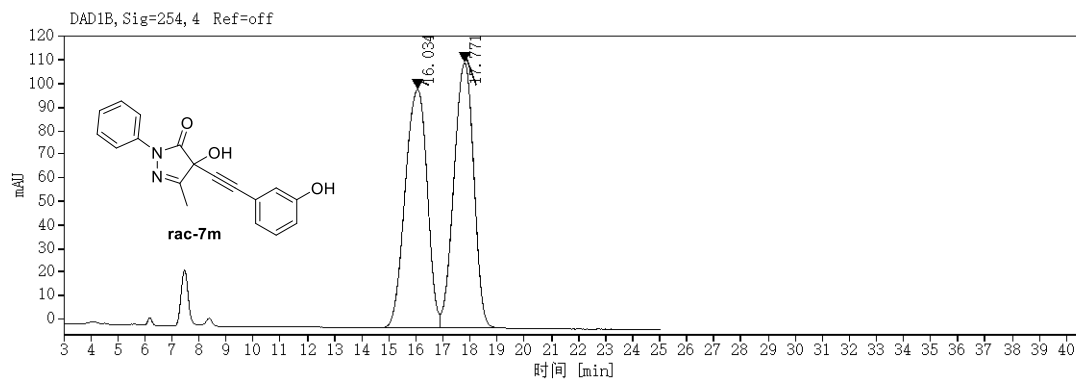

| RetTime [min] | Type | Width [min] | Area [mAU * s] | Height [mAU] | Area% |
|---------------|------|-------------|----------------|--------------|-------|
| 16.034        | BV   | 2.13        | 5722.08        | 101.32       | 49.91 |
| 17.771        | VV   | 2.07        | 5743.11        | 112.82       | 50.09 |

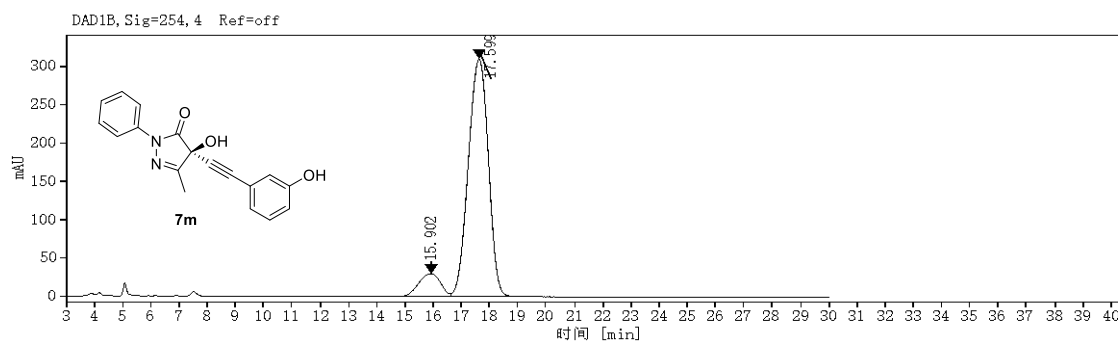

| RetTime [min] | Type | Width [min] | Area [mAU * s] | Height [mAU] | Area% |
|---------------|------|-------------|----------------|--------------|-------|
| 15.902        | BV   | 1.84        | 1609.79        | 29.65        | 9.48  |
| 17.599        | VV   | 2.64        | 15371.07       | 311.72       | 90.52 |

# SUPPORTING INFORMATION

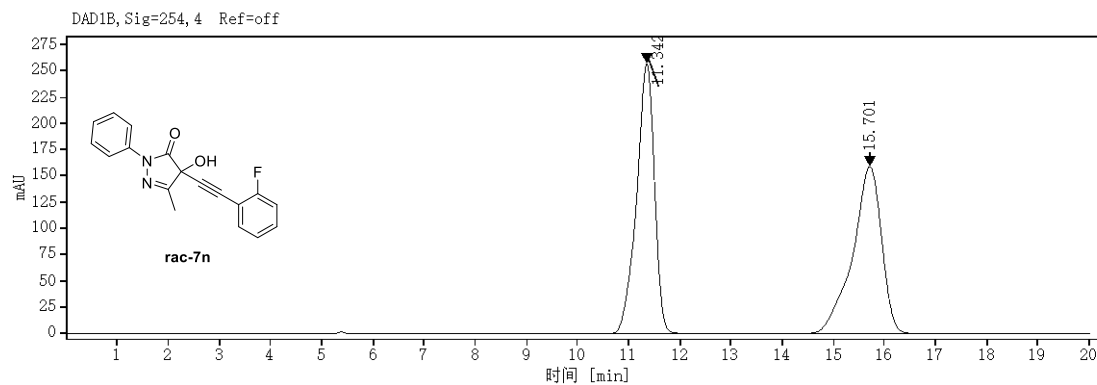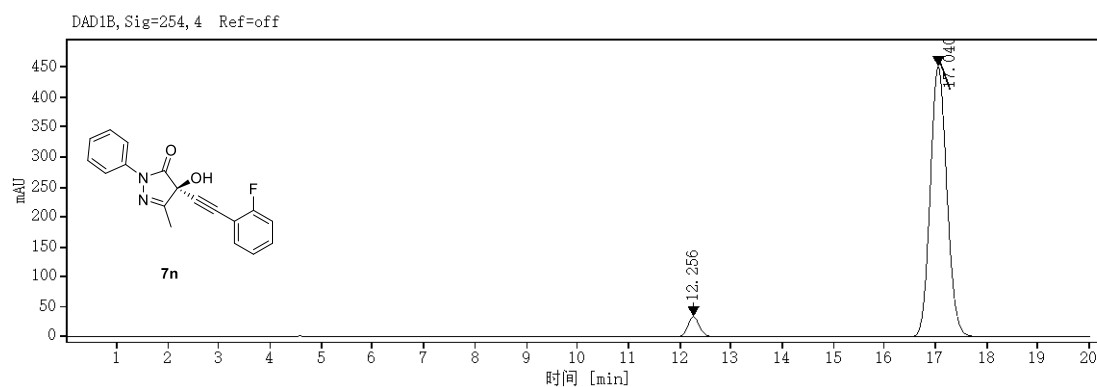

# SUPPORTING INFORMATION

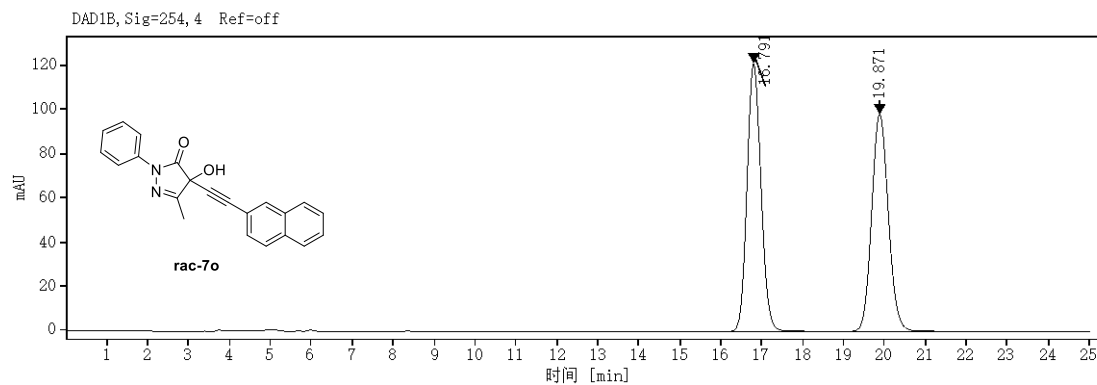

| RetTime [min] | Type | Width [min] | Area [mAU * s] | Height [mAU] | Area% |
|---------------|------|-------------|----------------|--------------|-------|
| 16.791        | BB   | 2.19        | 2871.91        | 121.39       | 50.89 |
| 19.871        | BB   | 2.45        | 2771.54        | 98.18        | 49.11 |

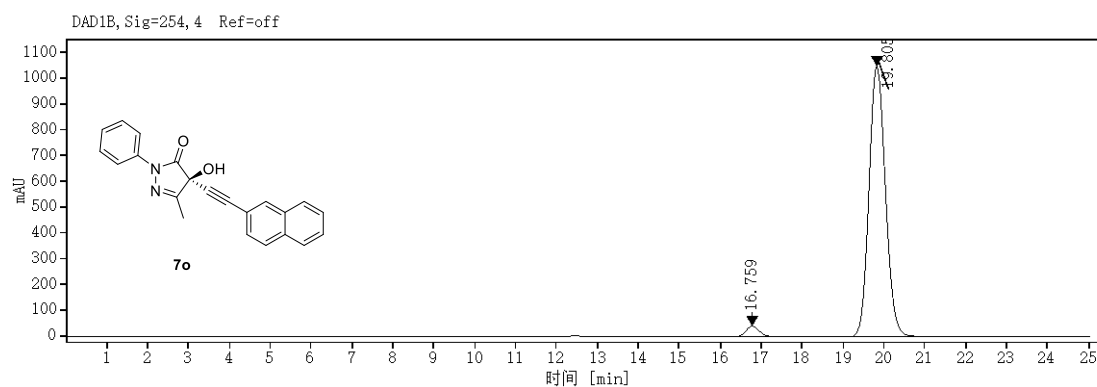

| RetTime [min] | Type | Width [min] | Area [mAU * s] | Height [mAU] | Area% |
|---------------|------|-------------|----------------|--------------|-------|
| 16.759        | MM m | 0.35        | 881.98         | 39.74        | 2.95  |
| 19.805        | BM m | 0.43        | 29036.63       | 1044.82      | 97.05 |

# SUPPORTING INFORMATION

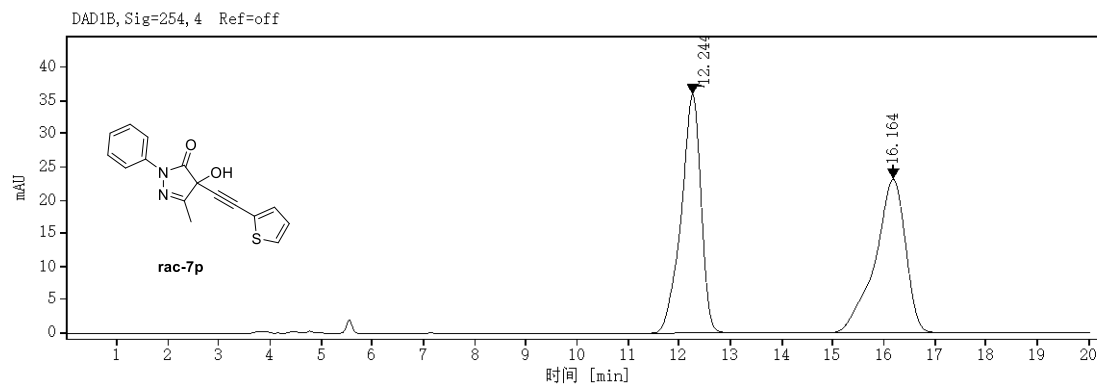

| RetTime [min] | Type | Width [min] | Area [mAU * s] | Height [mAU] | Area% |
|---------------|------|-------------|----------------|--------------|-------|
| 12.244        | BB   | 1.90        | 966.31         | 35.87        | 50.14 |
| 16.164        | BB   | 2.71        | 960.74         | 23.11        | 49.86 |

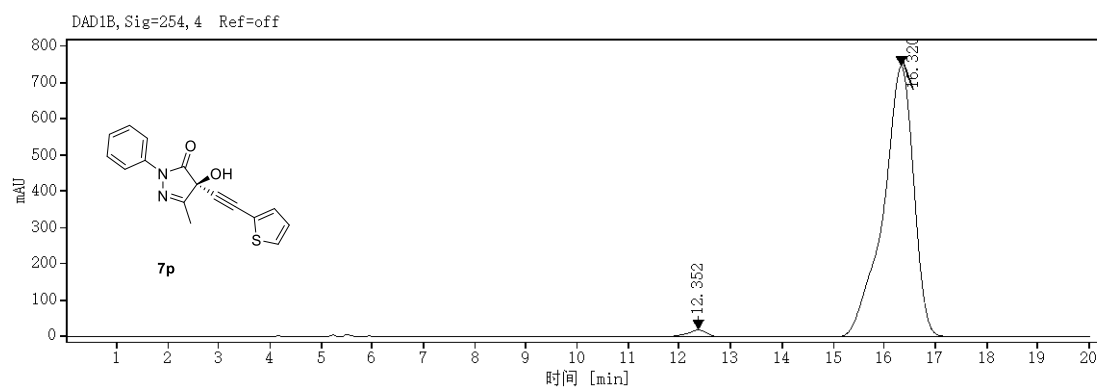

| RetTime [min] | Type | Width [min] | Area [mAU * s] | Height [mAU] | Area% |
|---------------|------|-------------|----------------|--------------|-------|
| 12.352        | MM m | 0.39        | 466.40         | 18.31        | 1.49  |
| 16.320        | BM m | 0.62        | 30882.92       | 745.98       | 98.51 |

# SUPPORTING INFORMATION

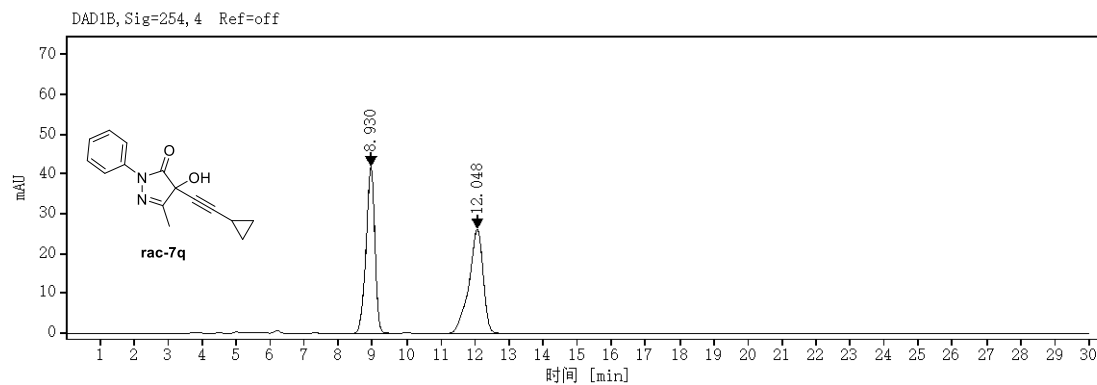

| RetTime [min] | Type | Width [min] | Area [mAU * s] | Height [mAU] | Area% |
|---------------|------|-------------|----------------|--------------|-------|
| 8.930         | BB   | 1.33        | 753.06         | 41.89        | 50.00 |
| 12.048        | BB   | 1.88        | 753.01         | 26.19        | 50.00 |

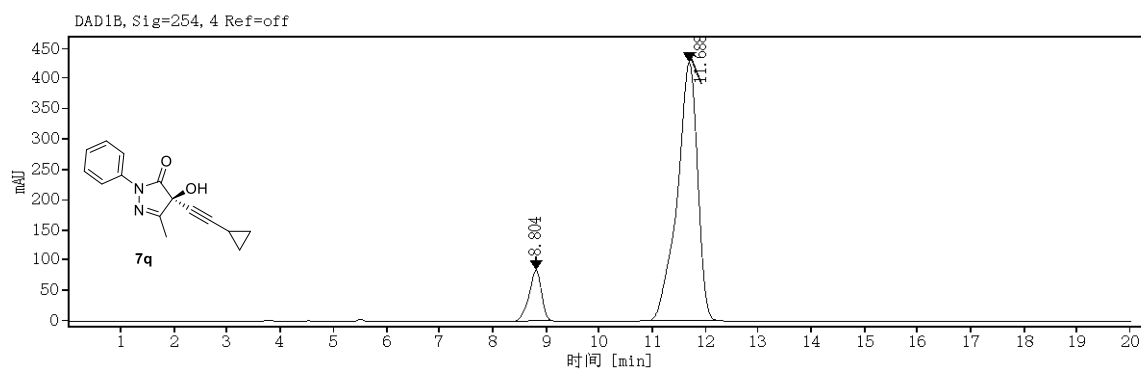

| RetTime [min] | Type | Width [min] | Area [mAU * s] | Height [mAU] | Area% |
|---------------|------|-------------|----------------|--------------|-------|
| 8.804         | MM m | 0.25        | 1348.96        | 83.14        | 10.57 |
| 11.688        | MM m | 0.40        | 11409.81       | 426.56       | 89.43 |

# SUPPORTING INFORMATION

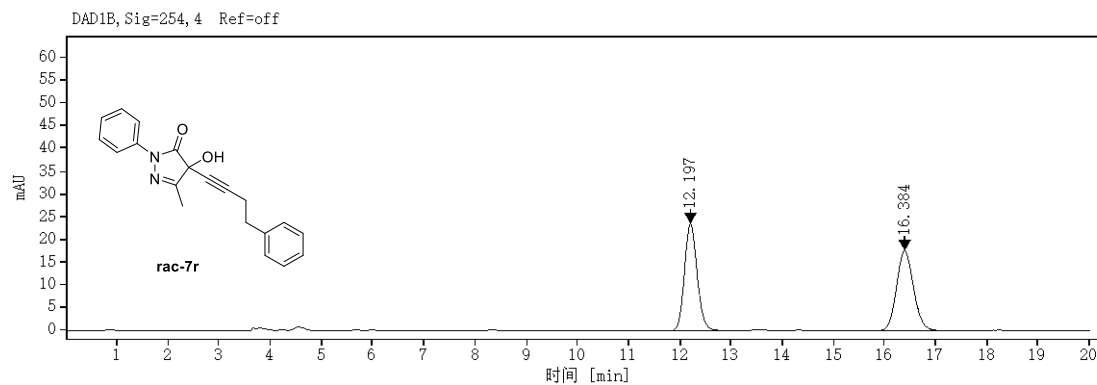

| RetTime [min] | Type | Width [min] | Area [mAU * s] | Height [mAU] | Area% |
|---------------|------|-------------|----------------|--------------|-------|
| 12.197        | BB   | 1.24        | 405.10         | 23.59        | 49.94 |
| 16.384        | BB   | 1.42        | 406.04         | 17.61        | 50.06 |

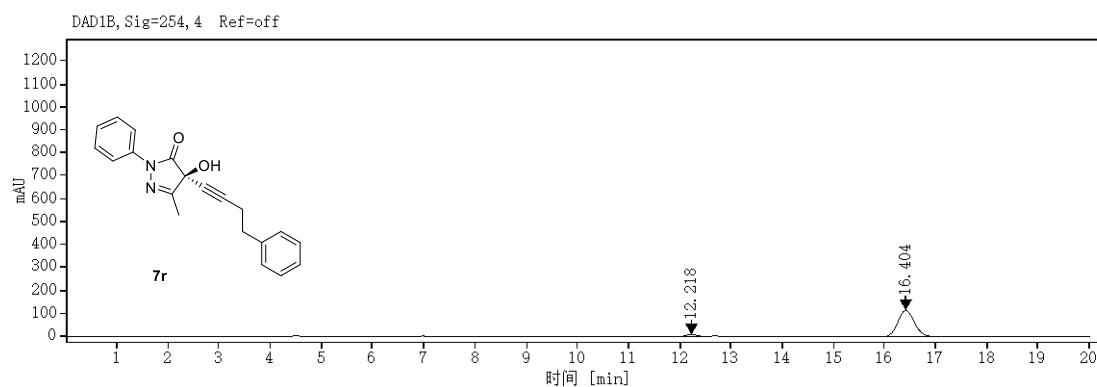

| RetTime [min] | Type | Width [min] | Area [mAU * s] | Height [mAU] | Area% |
|---------------|------|-------------|----------------|--------------|-------|
| 12.218        | MM m | 0.23        | 133.63         | 9.02         | 4.86  |
| 16.404        | BB   | 1.98        | 2613.63        | 115.71       | 95.14 |

# SUPPORTING INFORMATION

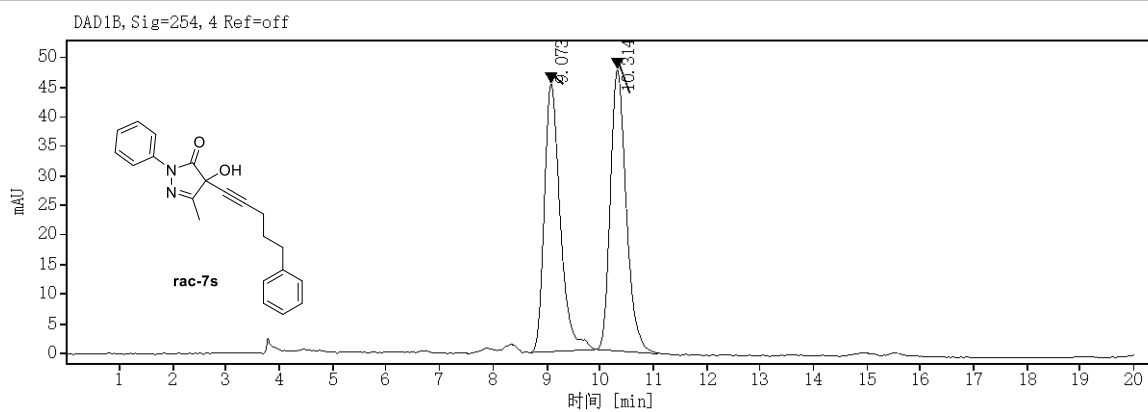

| RetTime [min] | Type | Width [min] | Area [mAU * s] | Height [mAU] | Area% |
|---------------|------|-------------|----------------|--------------|-------|
| 9.073         | BM m | 0.31        | 938.50         | 45.31        | 48.85 |
| 10.314        | BV   | 1.14        | 982.63         | 47.64        | 51.15 |

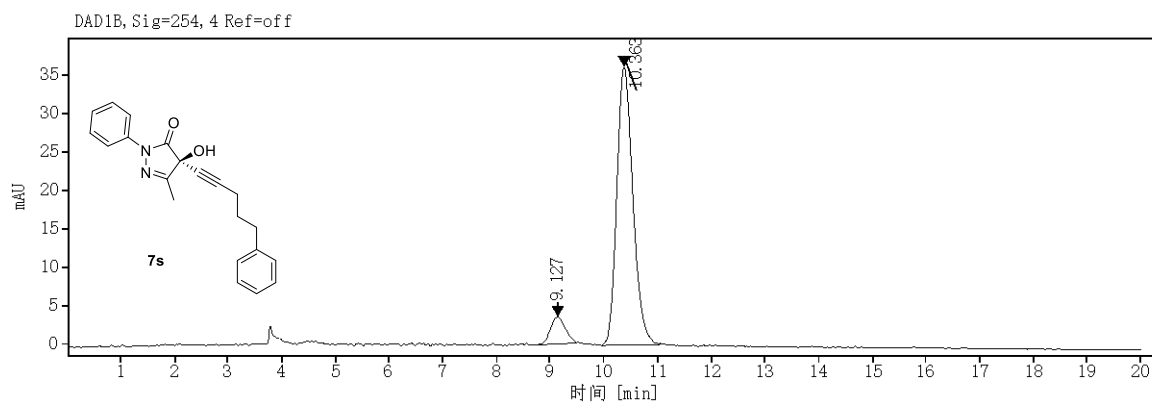

| RetTime [min] | Type | Width [min] | Area [mAU * s] | Height [mAU] | Area% |
|---------------|------|-------------|----------------|--------------|-------|
| 9.127         | BM m | 0.24        | 68.08          | 3.53         | 8.26  |
| 10.363        | BM m | 0.32        | 756.16         | 36.30        | 91.74 |

# SUPPORTING INFORMATION

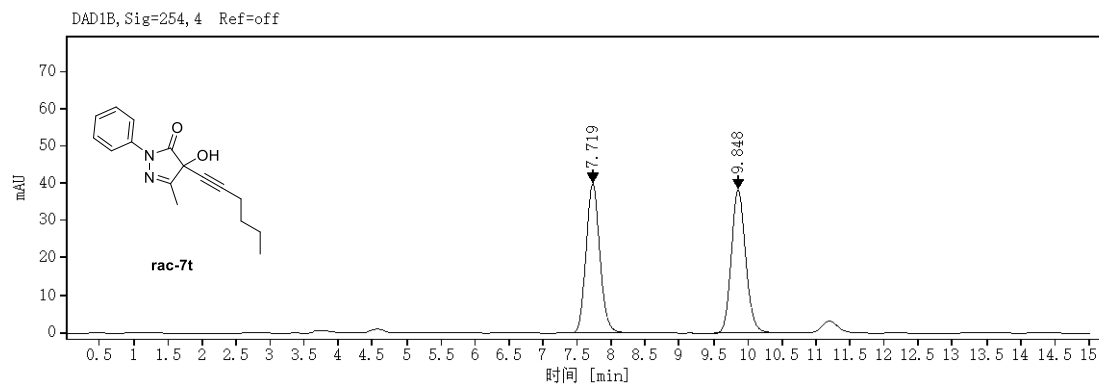

| RetTime [min] | Type | Width [min] | Area [mAU * s] | Height [mAU] | Area% |
|---------------|------|-------------|----------------|--------------|-------|
| 7.719         | BB   | 1.39        | 564.50         | 40.13        | 50.12 |
| 9.848         | BB   | 1.05        | 561.90         | 38.50        | 49.88 |

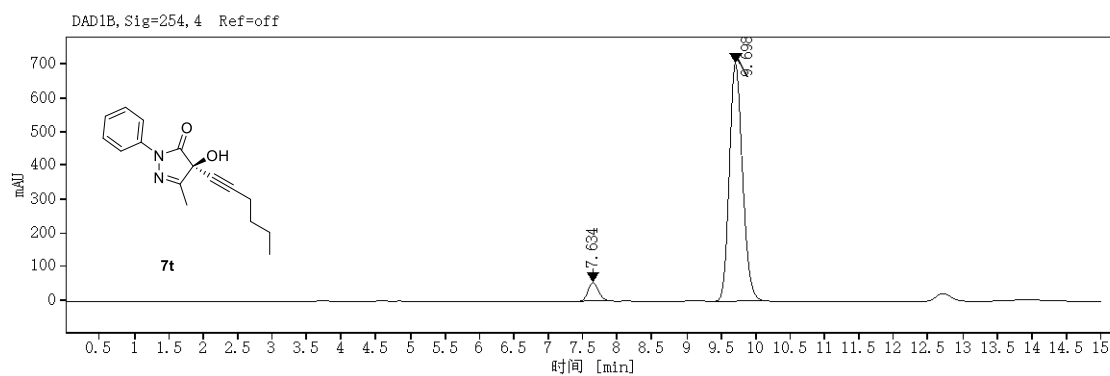

| RetTime [min] | Type | Width [min] | Area [mAU * s] | Height [mAU] | Area% |
|---------------|------|-------------|----------------|--------------|-------|
| 7.634         | MM m | 0.16        | 559.39         | 53.92        | 5.65  |
| 9.698         | VM m | 0.21        | 9342.64        | 702.50       | 94.35 |



# SUPPORTING INFORMATION

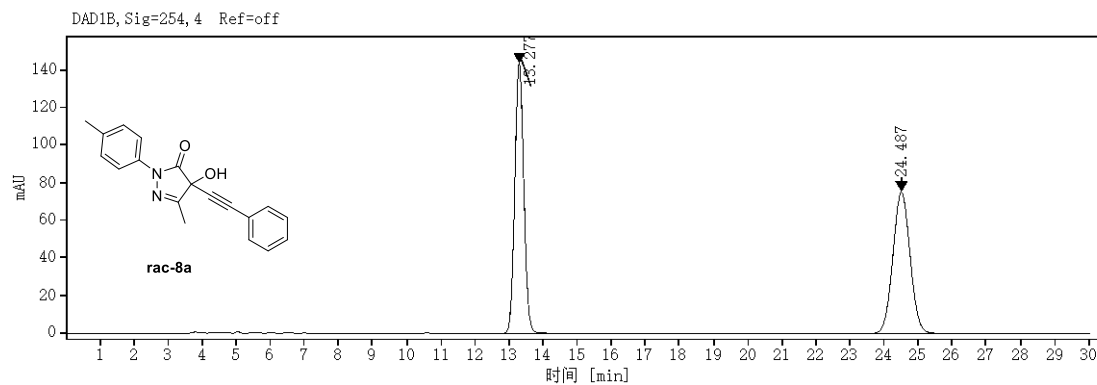

| RetTime [min] | Type | Width [min] | Area [mAU * s] | Height [mAU] | Area% |
|---------------|------|-------------|----------------|--------------|-------|
| 13.277        | BB   | 1.76        | 2629.36        | 143.63       | 49.99 |
| 24.487        | BB   | 2.39        | 2630.89        | 75.19        | 50.01 |

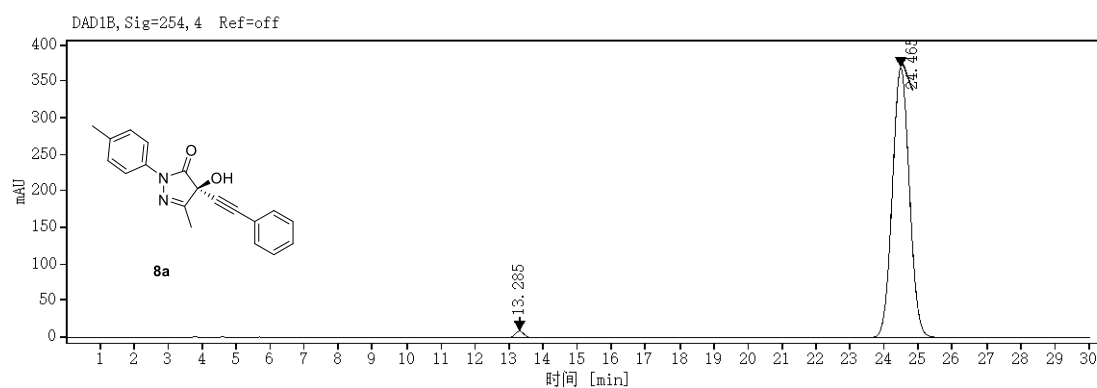

| RetTime [min] | Type | Width [min] | Area [mAU * s] | Height [mAU] | Area% |
|---------------|------|-------------|----------------|--------------|-------|
| 13.285        | MM m | 0.27        | 152.36         | 8.93         | 1.18  |
| 24.465        | MM m | 0.54        | 12795.48       | 369.72       | 98.82 |

# SUPPORTING INFORMATION

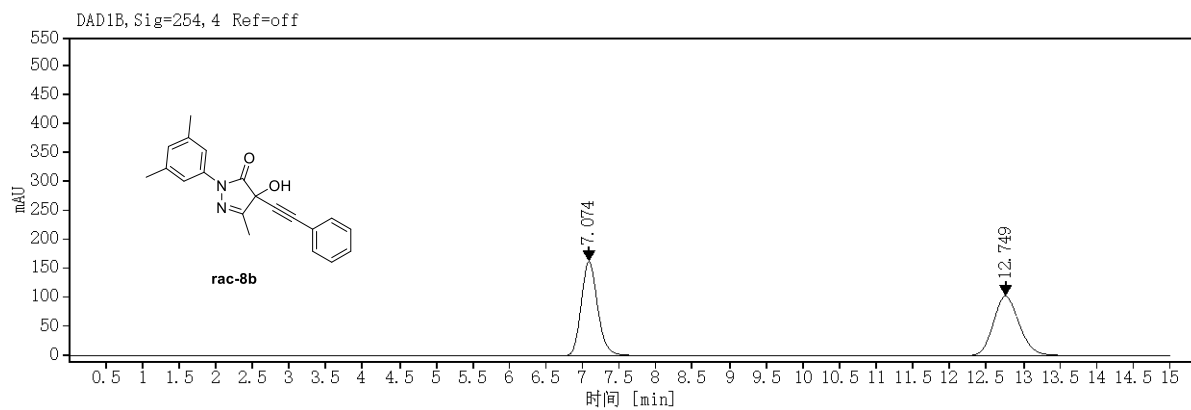

| RetTime [min] | Type | Width [min] | Area [mAU * s] | Height [mAU] | Area% |
|---------------|------|-------------|----------------|--------------|-------|
| 7.074         | VV   | 1.42        | 2565.48        | 163.31       | 49.93 |
| 12.749        | BBA  | 3.11        | 2572.27        | 103.36       | 50.07 |

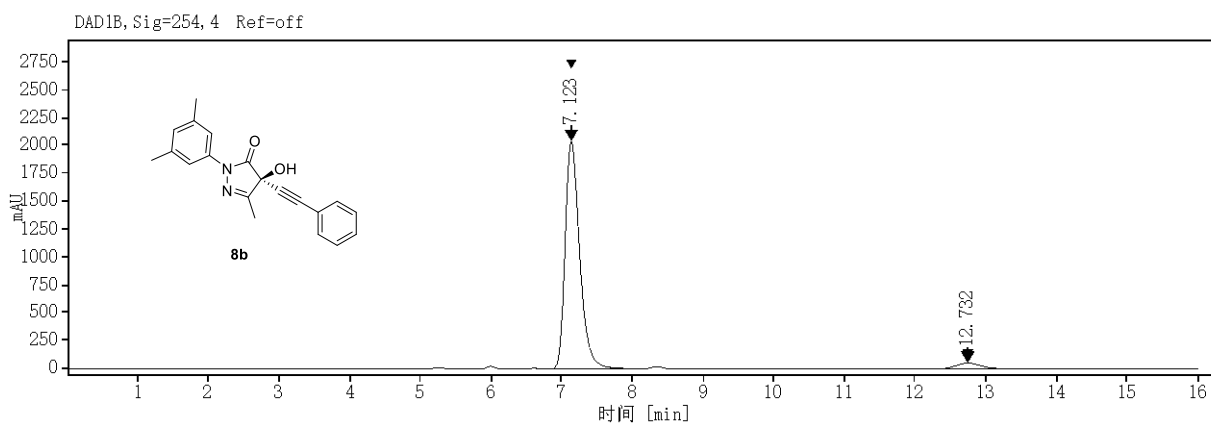

| RetTime [min] | Type | Width [min] | Area [mAU * s] | Height [mAU] | Area% |
|---------------|------|-------------|----------------|--------------|-------|
| 7.123         | BM m | 0.22        | 28979.82       | 2041.62      | 96.09 |
| 12.732        | MM m | 0.37        | 1180.02        | 50.66        | 3.91  |

# SUPPORTING INFORMATION

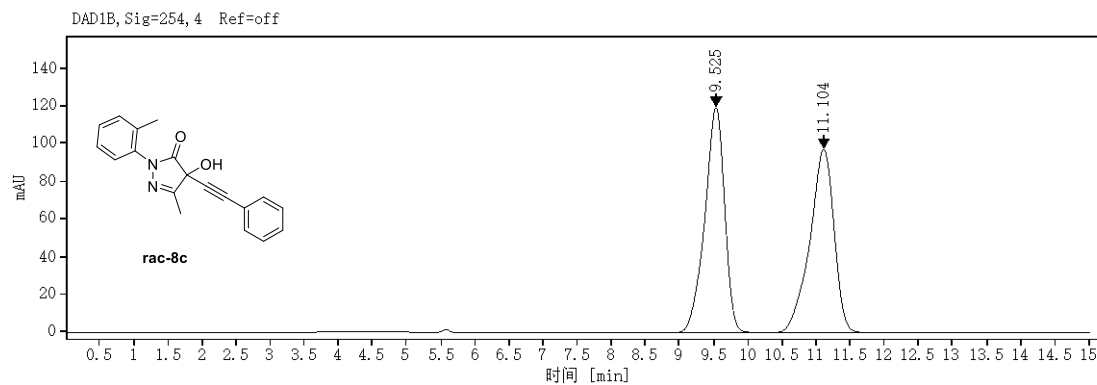

| RetTime [min] | Type | Width [min] | Area [mAU * s] | Height [mAU] | Area% |
|---------------|------|-------------|----------------|--------------|-------|
| 9.525         | BM m | 0.31        | 2407.91        | 119.37       | 50.07 |
| 11.104        | BM m | 0.37        | 2401.14        | 97.29        | 49.93 |

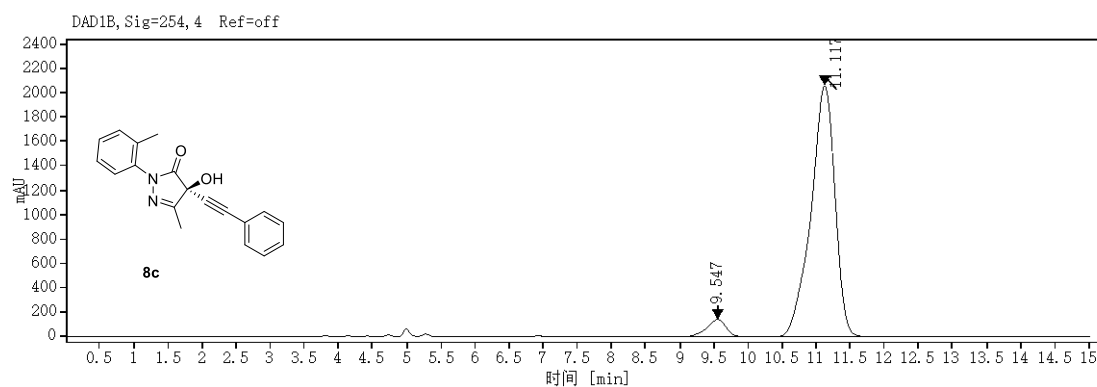

| RetTime [min] | Type | Width [min] | Area [mAU * s] | Height [mAU] | Area% |
|---------------|------|-------------|----------------|--------------|-------|
| 9.547         | MM m | 0.29        | 2712.02        | 140.51       | 5.10  |
| 11.117        | MM m | 0.37        | 50442.47       | 2063.28      | 94.90 |

# SUPPORTING INFORMATION

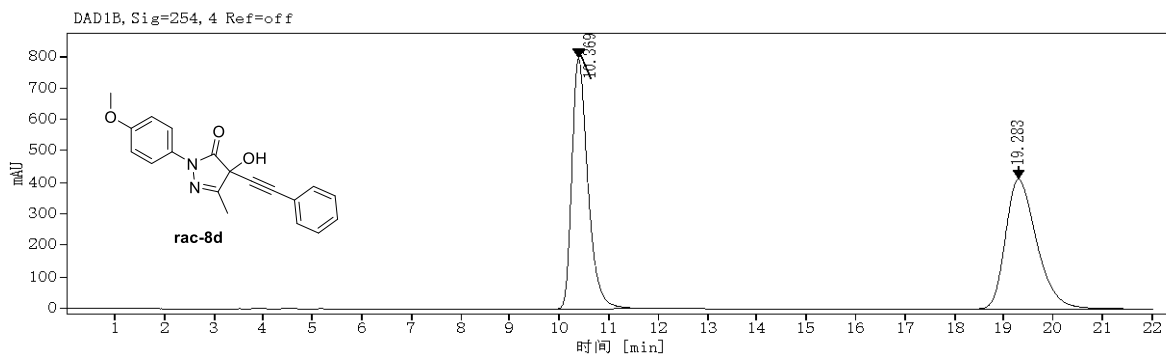

| RetTime [min] | Type | Width [min] | Area [mAU * s] | Height [mAU] | Area% |
|---------------|------|-------------|----------------|--------------|-------|
| 10.369        | BV   | 1.95        | 18010.10       | 797.18       | 49.76 |
| 19.283        | BBA  | 3.81        | 18183.29       | 412.83       | 50.24 |

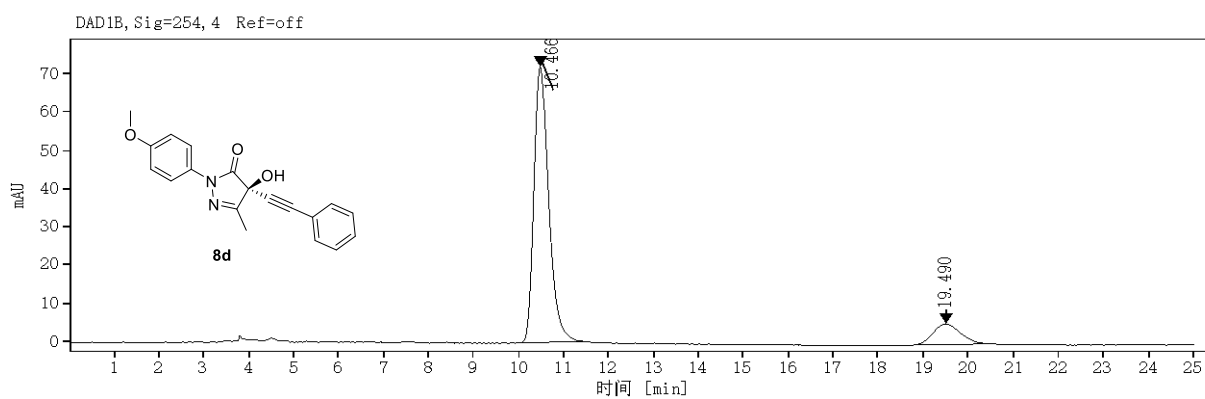

| RetTime [min] | Type | Width [min] | Area [mAU * s] | Height [mAU] | Area% |
|---------------|------|-------------|----------------|--------------|-------|
| 10.466        | BM m | 0.35        | 1646.60        | 72.06        | 87.85 |
| 19.490        | MM m | 0.52        | 227.67         | 5.34         | 12.15 |

# SUPPORTING INFORMATION

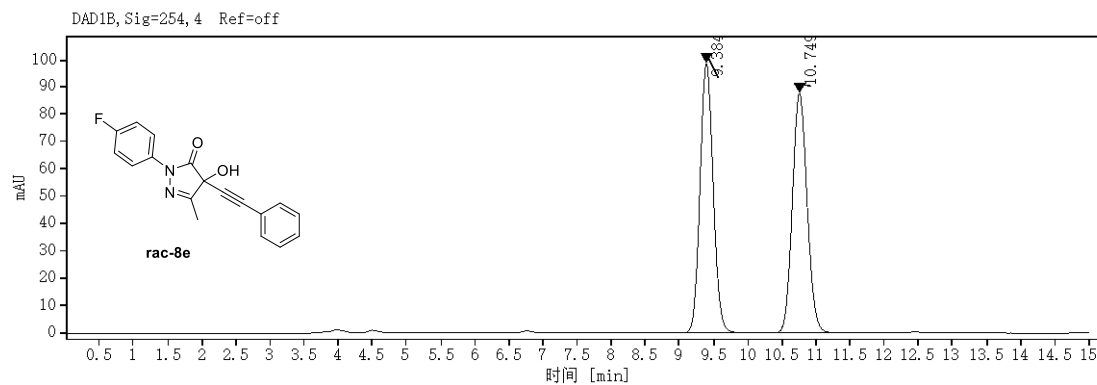

| RetTime [min] | Type | Width [min] | Area [mAU * s] | Height [mAU] | Area% |
|---------------|------|-------------|----------------|--------------|-------|
| 9.384         | BB   | 1.36        | 1327.37        | 98.91        | 50.09 |
| 10.749        | BB   | 1.33        | 1322.66        | 87.99        | 49.91 |

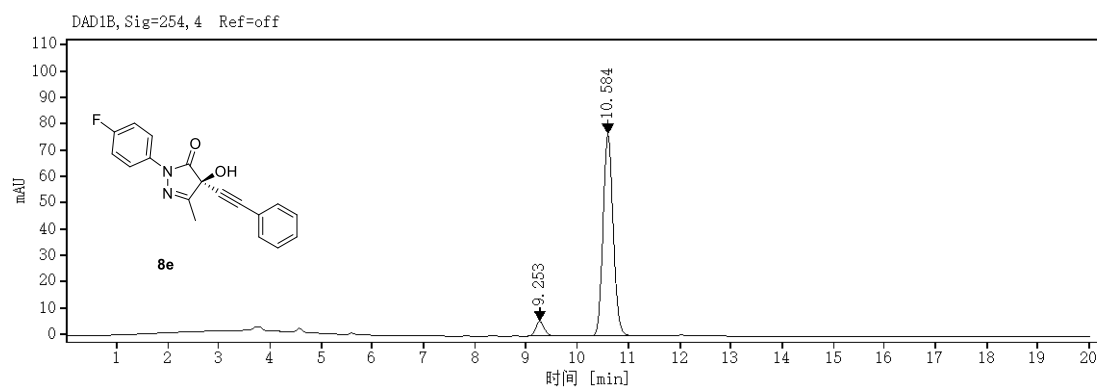

| RetTime [min] | Type | Width [min] | Area [mAU * s] | Height [mAU] | Area% |
|---------------|------|-------------|----------------|--------------|-------|
| 9.253         | MM m | 0.18        | 64.67          | 5.51         | 5.79  |
| 10.584        | BM m | 0.21        | 1052.15        | 76.57        | 94.21 |

# SUPPORTING INFORMATION

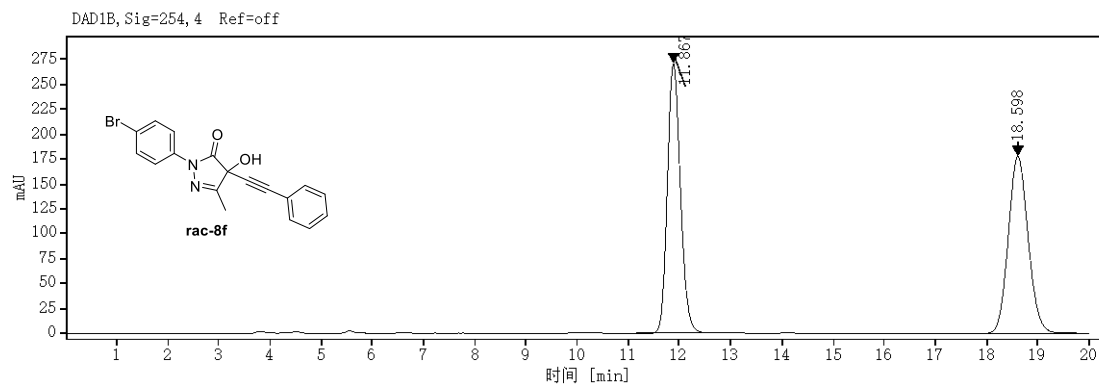

| RetTime [min] | Type | Width [min] | Area [mAU * s] | Height [mAU] | Area% |
|---------------|------|-------------|----------------|--------------|-------|
| 11.867        | BB   | 1.68        | 4793.81        | 271.22       | 50.03 |
| 18.598        | BB   | 1.99        | 4788.37        | 178.10       | 49.97 |

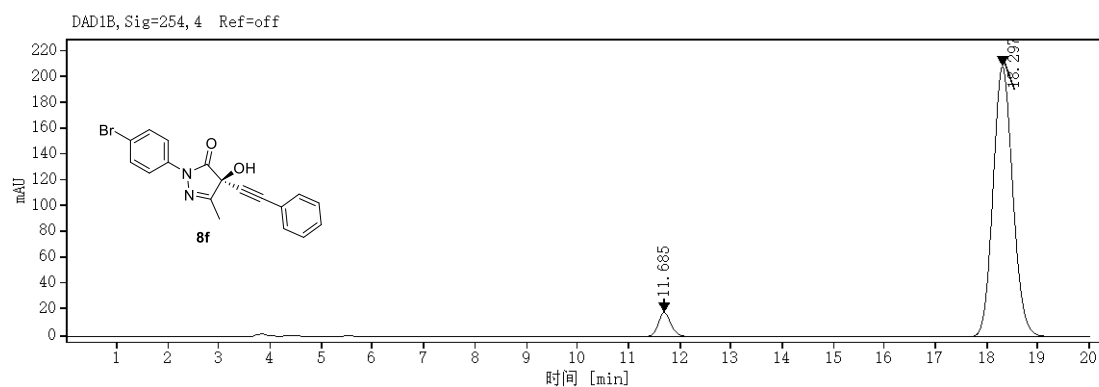

| RetTime [min] | Type | Width [min] | Area [mAU * s] | Height [mAU] | Area% |
|---------------|------|-------------|----------------|--------------|-------|
| 11.685        | BB   | 1.20        | 323.06         | 18.47        | 5.45  |
| 18.297        | BB   | 2.06        | 5605.18        | 209.13       | 94.55 |

# SUPPORTING INFORMATION

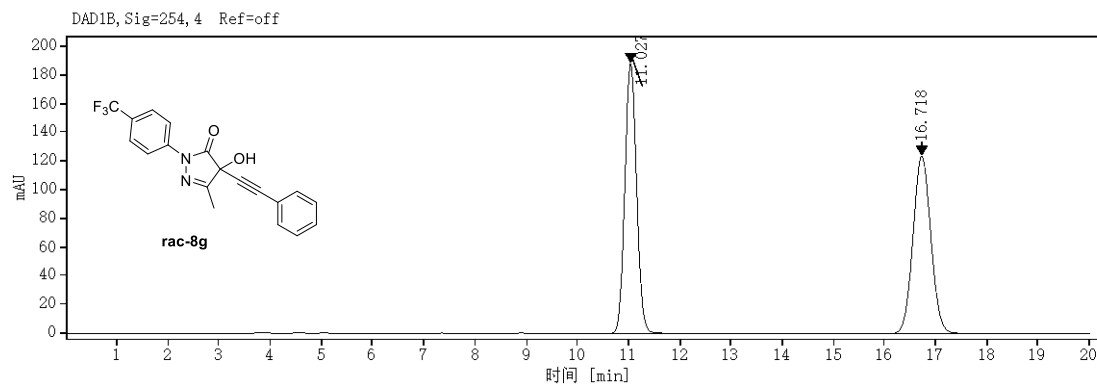

| RetTime [min] | Type | Width [min] | Area [mAU * s] | Height [mAU] | Area% |
|---------------|------|-------------|----------------|--------------|-------|
| 11.027        | BM m | 0.25        | 2984.97        | 188.33       | 49.92 |
| 16.718        | BM m | 0.38        | 2994.40        | 123.65       | 50.08 |

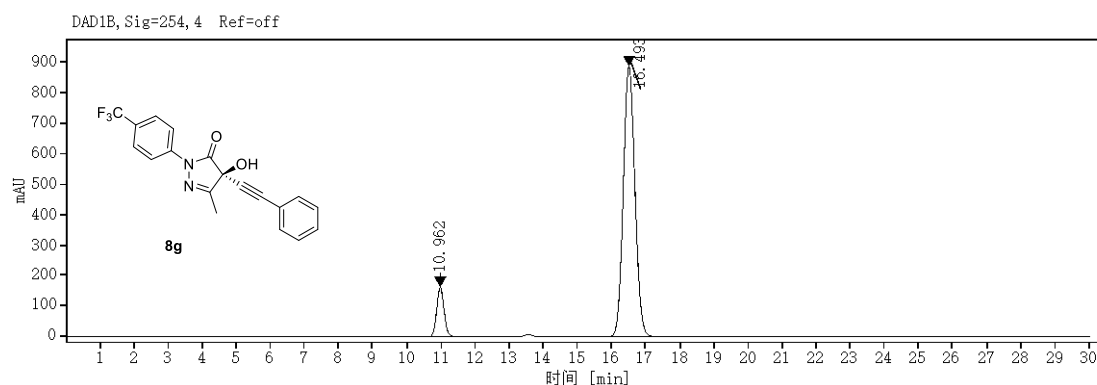

| RetTime [min] | Type | Width [min] | Area [mAU * s] | Height [mAU] | Area% |
|---------------|------|-------------|----------------|--------------|-------|
| 10.962        | MM m | 0.23        | 2453.57        | 163.24       | 10.45 |
| 16.493        | MM m | 0.37        | 21021.56       | 889.82       | 89.55 |

# SUPPORTING INFORMATION

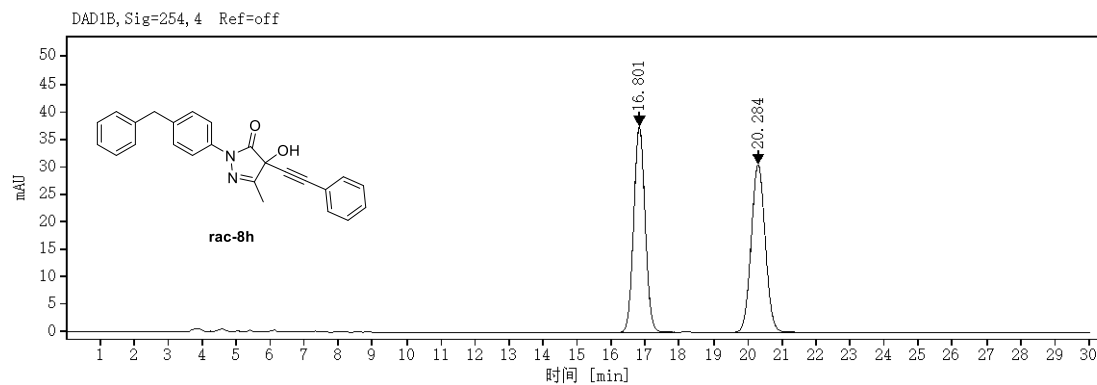

| RetTime [min] | Type | Width [min] | Area [mAU * s] | Height [mAU] | Area% |
|---------------|------|-------------|----------------|--------------|-------|
| 16.801        | BB   | 1.72        | 872.74         | 37.45        | 49.94 |
| 20.284        | BB   | 2.20        | 874.80         | 30.55        | 50.06 |

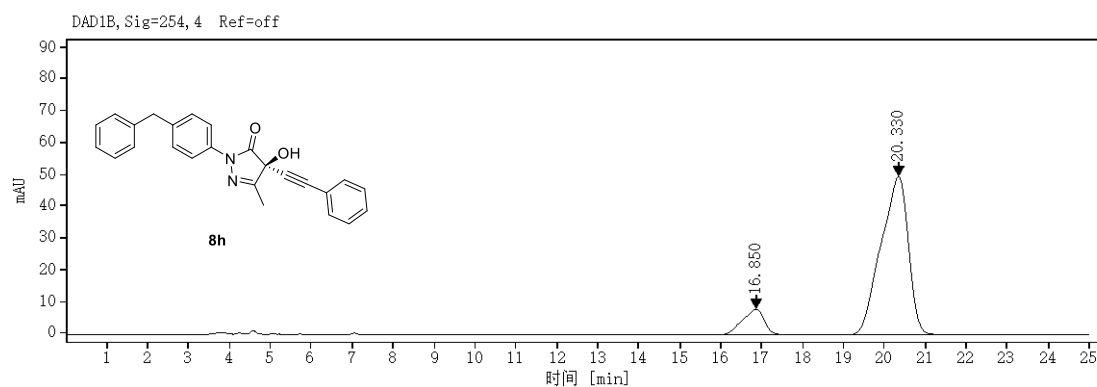

| RetTime [min] | Type | Width [min] | Area [mAU * s] | Height [mAU] | Area% |
|---------------|------|-------------|----------------|--------------|-------|
| 16.850        | MM m | 0.53        | 289.68         | 7.93         | 11.18 |
| 20.330        | MM m | 0.66        | 2302.04        | 49.65        | 88.82 |



# SUPPORTING INFORMATION

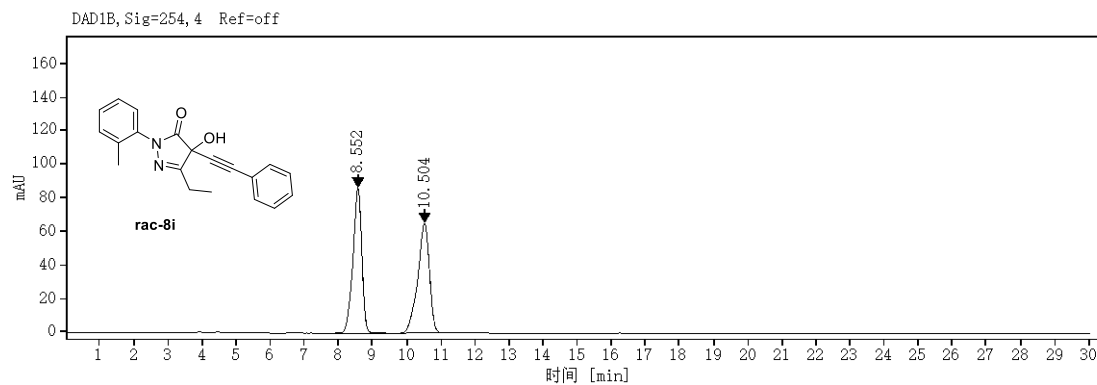

| RetTime [min] | Type | Width [min] | Area [mAU * s] | Height [mAU] | Area% |
|---------------|------|-------------|----------------|--------------|-------|
| 8.552         | BB   | 1.76        | 1566.96        | 86.27        | 50.16 |
| 10.504        | BB   | 1.41        | 1556.76        | 65.21        | 49.84 |

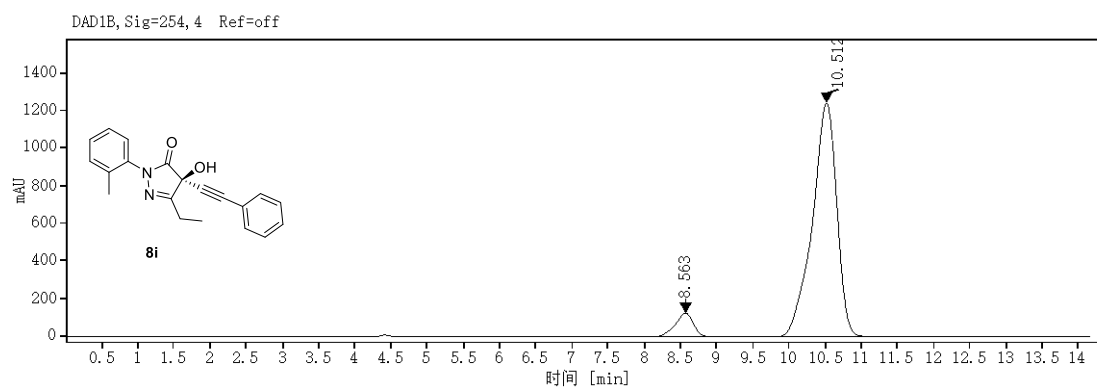

| RetTime [min] | Type | Width [min] | Area [mAU * s] | Height [mAU] | Area% |
|---------------|------|-------------|----------------|--------------|-------|
| 8.563         | MM m | 0.26        | 2180.29        | 124.71       | 6.97  |
| 10.512        | BM m | 0.35        | 29104.44       | 1241.82      | 93.03 |

# SUPPORTING INFORMATION

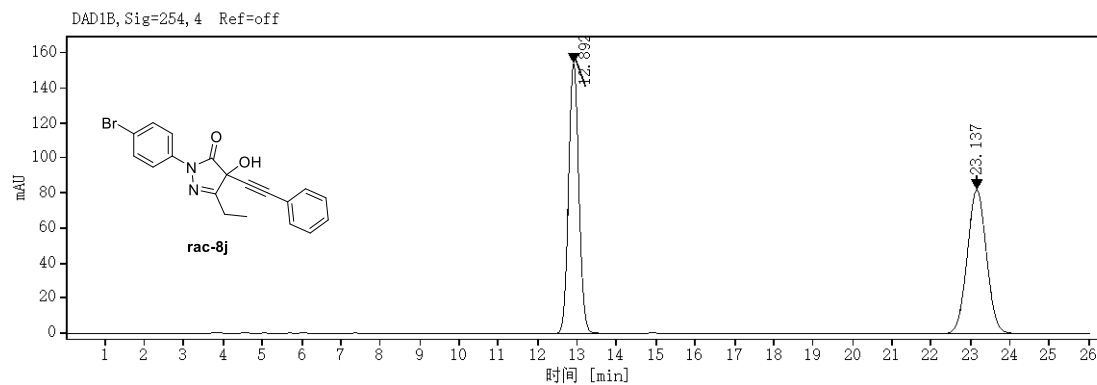

| RetTime [min] | Type | Width [min] | Area [mAU * s] | Height [mAU] | Area% |
|---------------|------|-------------|----------------|--------------|-------|
| 12.892        | BM m | 0.28        | 2780.52        | 154.03       | 50.06 |
| 23.137        | BM m | 0.53        | 2774.33        | 81.92        | 49.94 |

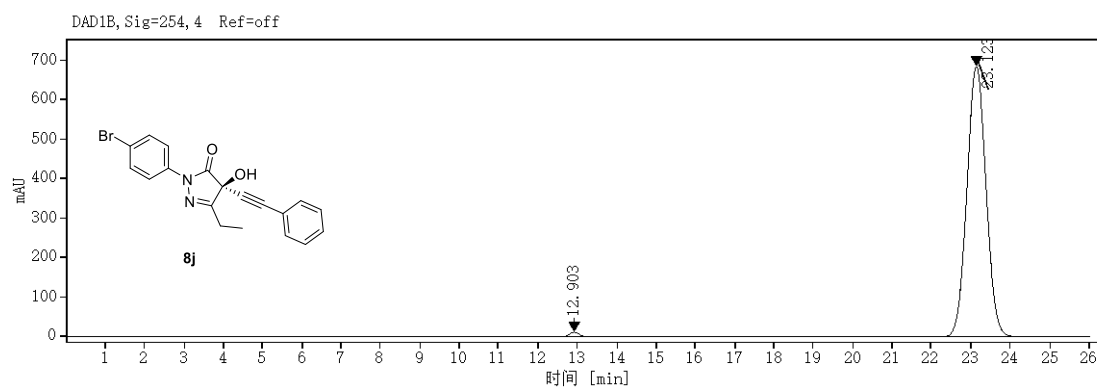

| RetTime [min] | Type | Width [min] | Area [mAU * s] | Height [mAU] | Area% |
|---------------|------|-------------|----------------|--------------|-------|
| 12.903        | BM m | 0.27        | 205.63         | 11.74        | 0.88  |
| 23.123        | BB   | 3.71        | 23205.11       | 686.14       | 99.12 |

# SUPPORTING INFORMATION

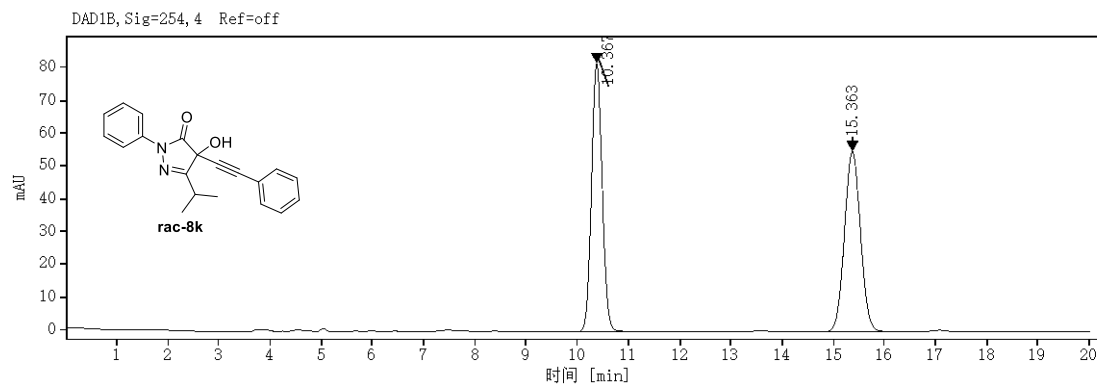

| RetTime [min] | Type | Width [min] | Area [mAU * s] | Height [mAU] | Area% |
|---------------|------|-------------|----------------|--------------|-------|
| 10.367        | BB   | 0.95        | 1177.66        | 81.73        | 49.70 |
| 15.363        | BB   | 1.59        | 1191.77        | 54.90        | 50.30 |

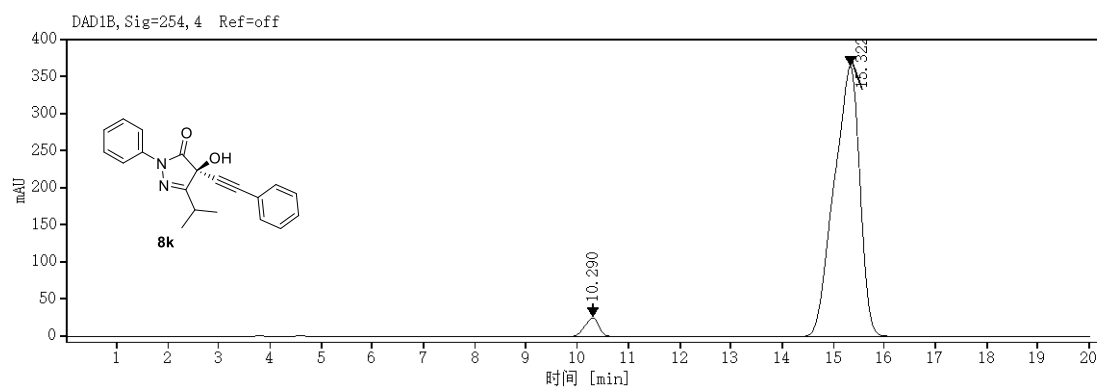

| RetTime [min] | Type | Width [min] | Area [mAU * s] | Height [mAU] | Area% |
|---------------|------|-------------|----------------|--------------|-------|
| 10.290        | BM m | 0.30        | 484.57         | 25.25        | 3.68  |
| 15.322        | BM m | 0.50        | 12684.00       | 363.75       | 96.32 |

# SUPPORTING INFORMATION

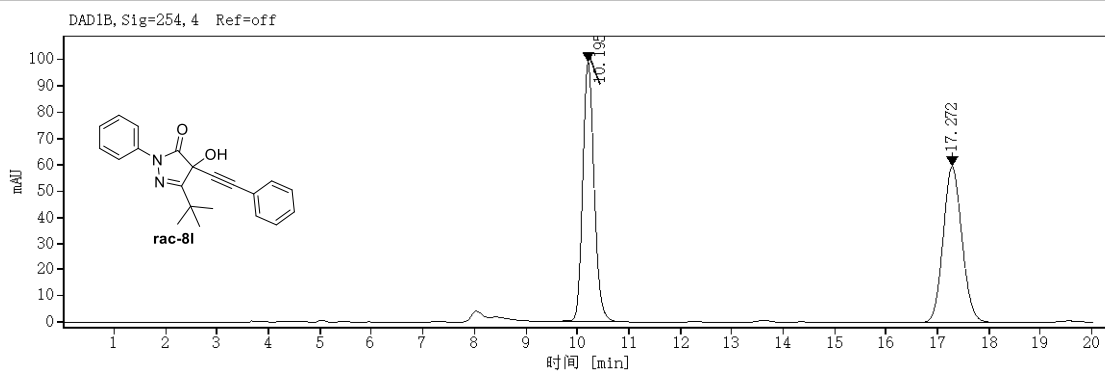

| RetTime [min] | Type | Width [min] | Area [mAU * s] | Height [mAU] | Area% |
|---------------|------|-------------|----------------|--------------|-------|
| 10.195        | MM m | 0.24        | 1519.46        | 98.98        | 50.27 |
| 17.272        | MM m | 0.39        | 1503.26        | 59.46        | 49.73 |

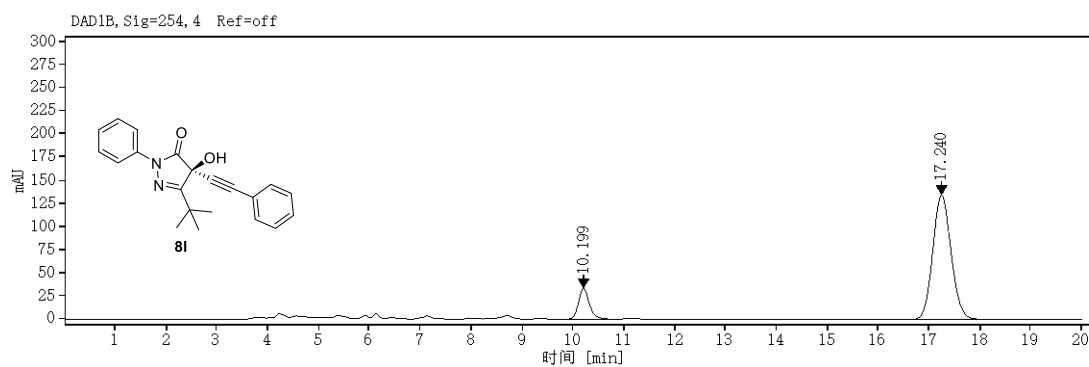

| RetTime [min] | Type | Width [min] | Area [mAU * s] | Height [mAU] | Area% |
|---------------|------|-------------|----------------|--------------|-------|
| 10.199        | BM m | 0.22        | 483.00         | 32.97        | 12.60 |
| 17.240        | BM m | 0.39        | 3350.14        | 134.24       | 87.40 |

# SUPPORTING INFORMATION

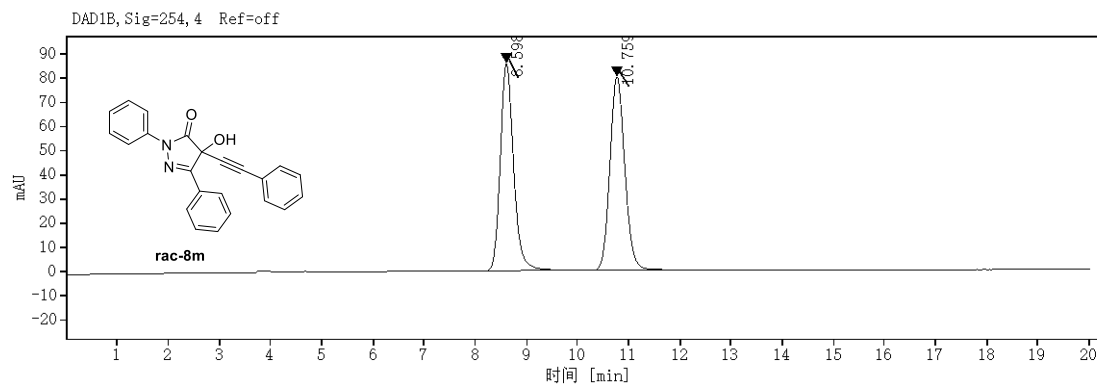

| RetTime [min] | Type | Width [min] | Area [mAU * s] | Height [mAU] | Area% |
|---------------|------|-------------|----------------|--------------|-------|
| 8.598         | BM m | 0.27        | 1542.94        | 85.42        | 48.92 |
| 10.759        | BM m | 0.31        | 1611.16        | 79.67        | 51.08 |

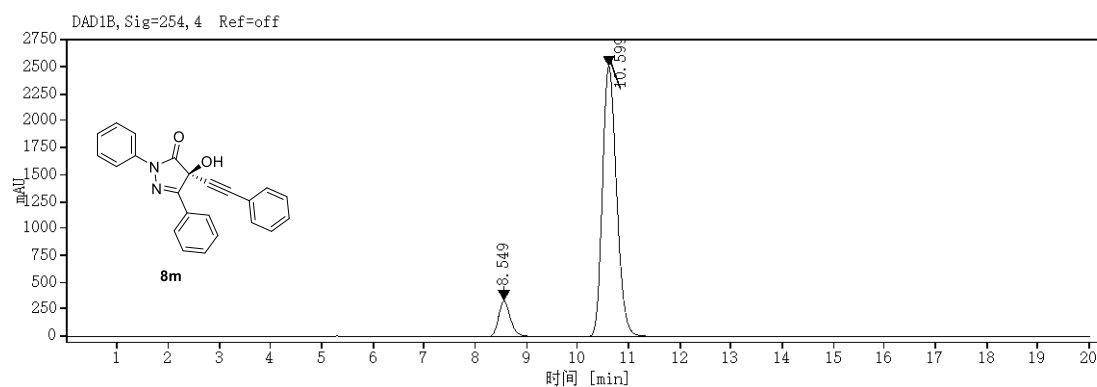

| RetTime [min] | Type | Width [min] | Area [mAU * s] | Height [mAU] | Area% |
|---------------|------|-------------|----------------|--------------|-------|
| 8.549         | MM m | 0.25        | 5300.02        | 331.93       | 9.94  |
| 10.599        | BM m | 0.30        | 48042.88       | 2507.21      | 90.06 |
